# Supplementary material for: What Causes Death in Esophageal Cancer Patients Other Than the Cancer Itself: A Large Population-Based Analysis
Source: PubMed Central journal article supplement (PMC9608205; doi:10.7150/jca.78004), 2022-10-17
Supplement: jcav13p3485s1.pdf [file jcav13p3485s1.pdf]

**Supplementary table 1: Standardized mortality ratio (SMR) for each cause of death following esophageal cancer diagnosis aged younger than 49 years.**

| Cause of Death                               | Less than a year      |                                     | 1-5 years             |                                     | 5-10 years            |                                | More than 10 years    |                              | Total                 |                                     |
|----------------------------------------------|-----------------------|-------------------------------------|-----------------------|-------------------------------------|-----------------------|--------------------------------|-----------------------|------------------------------|-----------------------|-------------------------------------|
|                                              | Observed <sup>1</sup> | SMR (95% CI <sup>2</sup> )          | Observed <sup>1</sup> | SMR (95% CI <sup>2</sup> )          | Observed <sup>1</sup> | SMR (95% CI <sup>2</sup> )     | Observed <sup>1</sup> | SMR (95% CI <sup>2</sup> )   | Observed <sup>1</sup> | SMR (95% CI <sup>2</sup> )          |
| All Causes of Death                          | 1,902                 | 200.77#<br>(191.84-210.00)          | 873                   | 104.41#<br>(97.60-111.58)           | 34                    | 17.64#<br>(12.21-24.65)        | 5                     | 10.06#<br>(3.27-23.48)       | 2,814                 | 138.90#<br>(133.81-144.13)          |
| All Malignant Cancer Causes of Death         | 1,807                 | 1,055.87#<br>(1,007.75-1,105.71)    | 824                   | 549.82#<br>(512.91-588.67)          | 26                    | 78.41#<br>(51.22-114.88)       | 4                     | 46.17#<br>(12.58-118.21)     | 2,661                 | 733.40#<br>(705.80-761.81)          |
| Esophageal Cancer Deaths                     | 1,614                 | 24,276.35#<br>(23,106.31-25,490.29) | 729                   | 12,378.04#<br>(11,495.69-13,310.15) | 20                    | 1,496.17#<br>(913.90-2,310.72) | 3                     | 920.12#<br>(189.75-2,688.98) | 2,366                 | 16,661.16#<br>(15,996.51-17,346.33) |
| Non-cancer Causes of Death                   |                       |                                     |                       |                                     |                       |                                |                       |                              |                       |                                     |
| In situ, benign or unknown behavior neoplasm | 1                     | 31.39<br>(0.79-174.91)              | 3                     | 107.00#<br>(22.07-312.70)           | 0                     | 0.00<br>(0.00-583.96)          | 0                     | 0.00<br>(0.00-2365.55)       | 4                     | 59.02#<br>(16.08-151.13)            |
| Tuberculosis                                 | 0                     | 0.00<br>(0.00-869.69)               | 0                     | 0.00<br>(0.00-1,095.16)             | 0                     | 0.00<br>(0.00-5,658.25)        | 0                     | 0.00<br>(0.00-24,248.05)     | 0                     | 0.00<br>(0.00-438.42)               |
| Syphilis                                     | 0                     | 0.00<br>(0.00-17,197.57)            | 0                     | 0.00<br>(0.00-23,294.4)             | 0                     | 0.00<br>(0.00-119,560)         | 0                     | 0.00<br>(0.00-432,131)       | 0                     | 0.00<br>(0.00-8,948.)               |

|                                    |    |                          |    |                             |   |                         |   |                          |    |                            |
|------------------------------------|----|--------------------------|----|-----------------------------|---|-------------------------|---|--------------------------|----|----------------------------|
|                                    |    |                          |    | 0)                          |   | .57)                    |   | .12)                     |    | 18)                        |
| Septicemia                         | 4  | 39.56#<br>(10.78-101.29) | 1  | 11.40<br>(0.29-63.50)       | 0 | 0.00<br>(0.00-183.00)   | 0 | 0.00<br>(0.00-674.72)    | 5  | 23.31#<br>(7.57-54.40)     |
| Other Infectious Diseases          | 6  | 13.58#<br>(4.98-29.55)   | 1  | 2.96<br>(0.07-16.48)        | 0 | 0.00<br>(0.00-62.26)    | 0 | 0.00<br>(0.00-323.40)    | 7  | 8.23#<br>(3.31-16.96)      |
| Diabetes Mellitus                  | 0  | 0.00<br>(0.00-13.58)     | 0  | 0.00<br>(0.00-15.38)        | 0 | 0.00<br>(0.00-64.99)    | 0 | 0.00<br>(0.00-237.10)    | 0  | 0.00<br>(0.00-6.32)        |
| Alzheimer's                        | 0  | 0.00<br>(0.00-1,834.07)  | 1  | 530.60#<br>(13.43-2,956.30) | 0 | 0.00<br>(0.00-8,102.05) | 0 | 0.00<br>(0.00-31,364.67) | 1  | 223.77#<br>(5.67-1,246.76) |
| Diseases of Heart                  | 24 | 12.89#<br>(8.26-19.18)   | 16 | 9.95#<br>(5.69-16.16)       | 1 | 2.79<br>(0.07-15.52)    | 1 | 11.10<br>(0.28-61.84)    | 42 | 10.72#<br>(7.72-14.49)     |
| Hypertension without Heart Disease | 1  | 16.79<br>(0.42-93.52)    | 0  | 0.00<br>(0.00-73.53)        | 0 | 0.00<br>(0.00-318.05)   | 0 | 0.00<br>(0.00-1,129.20)  | 1  | 8.02<br>(0.20-44.71)       |
| Cerebrovascular Diseases           | 4  | 15.15#<br>(4.13-38.79)   | 2  | 9.02#<br>(1.09-32.58)       | 1 | 20.89<br>(0.53-116.38)  | 0 | 0.00<br>(0.00-291.02)    | 7  | 12.81#<br>(5.15-26.40)     |
| Atherosclerosis                    | 0  | 0.00<br>(0.00-625.31)    | 0  | 0.00<br>(0.00-754.07)       | 0 | 0.00<br>(0.00-3,799.88) | 0 | 0.00<br>(0.00-16,495.59) | 0  | 0.00<br>(0.00-307.77)      |
| Aortic Aneurysm and Dissection     | 0  | 0.00<br>(0.00-83.83)     | 0  | 0.00<br>(0.00-97.46)        | 0 | 0.00<br>(0.00-424.55)   | 0 | 0.00<br>(0.00-1,672.57)  | 0  | 0.00<br>(0.00-39.77)       |

|                                                     |   |                            |   |                         |   |                         |   |                          |   |                          |
|-----------------------------------------------------|---|----------------------------|---|-------------------------|---|-------------------------|---|--------------------------|---|--------------------------|
| Other Diseases of Arteries, Arterioles, Capillaries | 0 | 0.00<br>(0.00-244.34)      | 0 | 0.00<br>(0.00-283.43)   | 0 | 0.00<br>(0.00-1,251.08) | 0 | 0.00<br>(0.00-4,370.12)  | 0 | 0.00<br>(0.00-115.62)    |
| Pneumonia and Influenza                             | 5 | 48.10#<br>(15.62-112.24)   | 3 | 32.83#<br>(6.77-95.95)  | 0 | 0.00<br>(0.00-173.76)   | 0 | 0.00<br>(0.00-666.69)    | 8 | 36.02#<br>(15.55-70.97)  |
| Chronic Obstructive Pulmonary Disease               | 4 | 32.77#<br>(8.93-83.90)     | 0 | 0.00<br>(0.00-34.28)    | 0 | 0.00<br>(0.00-151.46)   | 0 | 0.00<br>(0.00-575.53)    | 4 | 15.36#<br>(4.18-39.32)   |
| Stomach and Duodenal Ulcers                         | 0 | 0.00<br>(0.00-279.64)      | 0 | 0.00<br>(0.00-328.61)   | 0 | 0.00<br>(0.00-1,524.35) | 0 | 0.00<br>(0.00-5,990.67)  | 0 | 0.00<br>(0.00-134.37)    |
| Chronic Liver Disease and Cirrhosis                 | 2 | 4.58<br>(0.55-16.53)       | 1 | 2.52<br>(0.06-14.02)    | 1 | 10.55<br>(0.27-58.80)   | 0 | 0.00<br>(0.00-143.92)    | 4 | 4.19#<br>(1.14-10.73)    |
| Nephritis, Nephrotic Syndrome and Nephrosis         | 2 | 20.96#<br>(2.54-75.72)     | 0 | 0.00<br>(0.00-46.15)    | 0 | 0.00<br>(0.00-209.12)   | 0 | 0.00<br>(0.00-784.80)    | 2 | 10.12#<br>(1.23-36.55)   |
| Complications of Pregnancy, Childbirth, Puerperium  | 1 | 338.99#<br>(8.58-1,888.74) | 0 | 0.00<br>(0.00-1,144.15) | 0 | 0.00<br>(0.00-3,667.62) | 0 | 0.00<br>(0.00-11,879.71) | 1 | 133.50#<br>(3.38-743.84) |

|                                                    |    |                          |    |                          |   |                          |   |                           |    |                         |
|----------------------------------------------------|----|--------------------------|----|--------------------------|---|--------------------------|---|---------------------------|----|-------------------------|
| Congenital Anomalies                               | 0  | 0.00<br>(0.00-89.07)     | 0  | 0.00<br>(0.00-98.09)     | 0 | 0.00<br>(0.00-412.91)    | 0 | 0.00<br>(0.00-1,578.1)    | 0  | 0.00<br>(0.00-40.85)    |
| Certain Conditions Originating in Perinatal Period | 0  | 0.00<br>(0.00-10,089.17) | 0  | 0.00<br>(0.00-11,042.27) | 0 | 0.00<br>(0.00-47,470.08) | 0 | 0.00<br>(0.00-222,709.26) | 0  | 0.00<br>(0.00-4,646.12) |
| Symptoms, Signs and Ill-Defined Conditions         | 5  | 29.23#<br>(9.49-68.21)   | 2  | 13.85#<br>(1.68-50.02)   | 0 | 0.00<br>(0.00-122.92)    | 0 | 0.00<br>(0.00-521.37)     | 7  | 19.85#<br>(7.98-40.90)  |
| Accidents and Adverse Effects                      | 5  | 3.09#<br>(1.00-7.21)     | 5  | 3.32#<br>(1.08-7.76)     | 1 | 2.65<br>(0.07-14.76)     | 0 | 0.00<br>(0.00-37.11)      | 11 | 3.06#<br>(1.53-5.47)    |
| Suicide and Self-Inflicted Injury                  | 3  | 4.38<br>(0.90-12.80)     | 2  | 3.07<br>(0.37-11.09)     | 0 | 0.00<br>(0.00-22.15)     | 0 | 0.00<br>(0.00-86.60)      | 5  | 3.23#<br>(1.05-7.55)    |
| Homicide and Legal Intervention                    | 0  | 0.00<br>(0.00-15.78)     | 0  | 0.00<br>(0.00-19.06)     | 0 | 0.00<br>(0.00-86.35)     | 0 | 0.00<br>(0.00-359.32)     | 0  | 0.00<br>(0.00-7.68)     |
| Other Cause of Death                               | 28 | 24.67#<br>(16.39-35.65)  | 12 | 11.94#<br>(6.17-20.86)   | 4 | 17.07#<br>(4.65-43.71)   | 0 | 0.00<br>(0.00-59.62)      | 44 | 18.06#<br>(13.12-24.25) |

**1** number of cancer patients who died due to each cause of death.

**2** 95% Confidence interval.

# P value less than .05.

**Supplementary table 2: Standardized mortality ratio (SMR) for each cause of death following esophageal cancer diagnosis aged 50-64 years.**

| Cause of Death                               | Less than a year      |                                  | 1-5 years             |                                  | 5-10 years            |                            | More than 10 years    |                            | Total                 |                                  |
|----------------------------------------------|-----------------------|----------------------------------|-----------------------|----------------------------------|-----------------------|----------------------------|-----------------------|----------------------------|-----------------------|----------------------------------|
|                                              | Observed <sup>1</sup> | SMR (95% CI <sup>2</sup> )       | Observed <sup>1</sup> | SMR (95% CI <sup>2</sup> )       | Observed <sup>1</sup> | SMR (95% CI <sup>2</sup> ) | Observed <sup>1</sup> | SMR (95% CI <sup>2</sup> ) | Observed <sup>1</sup> | SMR (95% CI <sup>2</sup> )       |
| All Causes of Death                          | 10,149                | 68.64#<br>(67.32-69.99)          | 5,434                 | 31.95#<br>(31.11-32.81)          | 348                   | 5.76#<br>(5.17-6.39)       | 53                    | 2.94#<br>(2.20-3.85)       | 15,984                | 40.32#<br>(39.70-40.95)          |
| All Malignant Cancer Causes of Death         | 9,393                 | 201.70#<br>(197.64-205.82)       | 4,998                 | 93.11#<br>(90.55-95.73)          | 228                   | 12.04#<br>(10.53-13.71)    | 25                    | 4.55#<br>(2.95-6.72)       | 14,644                | 117.46#<br>(115.57-119.38)       |
| Esophageal Cancer Deaths                     | 8,443                 | 4,130.76#<br>(4,043.12-4,219.83) | 4,482                 | 1,895.07#<br>(1,839.99-1,951.38) | 159                   | 189.22#<br>(160.95-221.03) | 13                    | 52.67#<br>(28.04-90.06)    | 13,097                | 2,382.95#<br>(2,342.31-2,424.11) |
| Non-cancer Causes of Death                   |                       |                                  |                       |                                  |                       |                            |                       |                            |                       |                                  |
| In situ, benign or unknown behavior neoplasm | 18                    | 28.03#<br>(16.61-44.30)          | 10                    | 13.41#<br>(8.43-24.66)           | 2                     | 7.57<br>(0.92-27.33)       | 1                     | 12.96<br>(0.33-72.18)      | 31                    | 17.92#<br>(12.18-25.44)          |
| Tuberculosis                                 | 0                     | 0.00<br>(0.00-66.28)             | 0                     | 0.00<br>(0.00-63.73)             | 0                     | 0.00<br>(0.00-199.54)      | 0                     | 0.00<br>(0.00-728.26)      | 0                     | 0.00<br>(0.00-26.91)             |
| Syphilis                                     | 0                     | 0.00                             | 0                     | 0.00                             | 0                     | 0.00                       | 0                     | 0.00                       | 0                     | 0.00                             |

|                                         |     |                         |     |                        |    |                       |    |                       |     |                         |
|-----------------------------------------|-----|-------------------------|-----|------------------------|----|-----------------------|----|-----------------------|-----|-------------------------|
|                                         |     | (0.00-1,078.99)         |     | (0.00-1,022.06)        |    | (0.00-2,944.72)       |    | (0.00-9,30)           |     | (0.00-425.13)           |
| Septicemia                              | 41  | 20.15#<br>(14.46-27.34) | 25  | 10.62#<br>(6.87-15.68) | 5  | 5.82#<br>(1.89-13.57) | 2  | 7.63<br>(0.92-27.56)  | 73  | 13.25#<br>(10.39-16.66) |
| Other Infectious Diseases               | 39  | 12.20#<br>(8.67-16.67)  | 20  | 5.66#<br>(3.45-8.74)   | 3  | 2.45<br>(0.51-7.17)   | 0  | 0.00<br>(0.00-10.78)  | 62  | 7.47#<br>(5.73-9.58)    |
| Diabetes Mellitus                       | 16  | 2.80#<br>(1.60-4.55)    | 3   | 0.46<br>(0.09-1.34)    | 2  | 0.86<br>(0.10-3.10)   | 0  | 0.00<br>(0.00-5.23)   | 21  | 1.37<br>(0.85-2.10)     |
| Alzheimer's                             | 1   | 3.53<br>(0.09-19.66)    | 0   | 0.00<br>(0.00-10.43)   | 0  | 0.00<br>(0.00-26.65)  | 0  | 0.00<br>(0.00-79.50)  | 1   | 1.22<br>(0.03-6.78)     |
| Diseases of Heart                       | 206 | 5.58#<br>(4.85-6.40)    | 109 | 2.62#<br>(2.15-3.16)   | 42 | 2.92#<br>(2.11-3.95)  | 11 | 2.59#<br>(1.30-4.64)  | 368 | 3.79#<br>(3.41-4.20)    |
| Hypertension without Heart Disease      | 11  | 8.63#<br>(4.31-15.45)   | 5   | 3.41#<br>(1.11-7.95)   | 1  | 1.81<br>(0.05-10.10)  | 1  | 5.60<br>(0.14-31.20)  | 18  | 5.18#<br>(3.07-8.19)    |
| Cerebrovascular Diseases                | 35  | 6.86#<br>(4.78-9.54)    | 19  | 3.35#<br>(2.02-5.23)   | 3  | 1.53<br>(0.31-4.46)   | 1  | 1.72<br>(0.04-9.59)   | 58  | 4.35#<br>(3.31-5.63)    |
| Atherosclerosis                         | 4   | 20.24#<br>(5.52-51.83)  | 1   | 4.62<br>(0.12-25.72)   | 0  | 0.00<br>(0.00-52.07)  | 0  | 0.00<br>(0.00-186.15) | 5   | 9.90#<br>(3.22-23.11)   |
| Aortic Aneurysm and Dissection          | 3   | 4.03<br>(0.83-11.79)    | 1   | 1.21<br>(0.03-6.77)    | 0  | 0.00<br>(0.00-13.50)  | 0  | 0.00<br>(0.00-47.53)  | 4   | 2.09<br>(0.57-5.34)     |
| Other Diseases of Arteries, Arterioles, | 5   | 12.06#<br>(3.92-28.15)  | 1   | 2.10<br>(0.05-11.69)   | 1  | 5.83<br>(0.15-32.47)  | 0  | 0.00<br>(0.00-69.22)  | 7   | 6.27#<br>(2.52-12.92)   |

|                                                    |    |                            |    |                         |    |                         |   |                          |    |                          |
|----------------------------------------------------|----|----------------------------|----|-------------------------|----|-------------------------|---|--------------------------|----|--------------------------|
| Capillaries                                        |    |                            |    |                         |    |                         |   |                          |    |                          |
| Pneumonia and Influenza                            | 27 | 14.77#<br>(9.73-21.49)     | 18 | 8.49#<br>(5.03-13.42)   | 3  | 3.89<br>(0.80-11.38)    | 1 | 4.22<br>(0.11-23.51)     | 49 | 9.89#<br>(7.31-13.07)    |
| Chronic Obstructive Pulmonary Disease              | 47 | 7.93#<br>(5.83-10.55)      | 32 | 4.51#<br>(3.08-6.37)    | 10 | 3.80#<br>(1.82-6.99)    | 3 | 3.67<br>(0.76-10.72)     | 92 | 5.59#<br>(4.50-6.85)     |
| Stomach and Duodenal Ulcers                        | 1  | 4.53<br>(0.11-25.23)       | 2  | 8.02<br>(0.97-28.98)    | 1  | 11.52<br>(0.29-64.19)   | 0 | 0.00<br>(0.00-139.60)    | 4  | 6.86#<br>(1.87-17.56)    |
| Chronic Liver Disease and Cirrhosis                | 39 | 7.54#<br>(5.36-10.30)      | 20 | 3.27#<br>(2.00-5.05)    | 3  | 1.33<br>(0.27-3.88)     | 2 | 2.87<br>(0.35-10.36)     | 64 | 4.49#<br>(3.46-5.73)     |
| Nephritis, Nephrotic Syndrome and Nephrosis        | 19 | 8.92#<br>(5.37-13.93)      | 8  | 3.32#<br>(1.43-6.55)    | 2  | 2.32<br>(0.28-8.38)     | 0 | 0.00<br>(0.00-14.29)     | 29 | 5.13#<br>(3.43-7.36)     |
| Complications of Pregnancy, Childbirth, Puerperium | 1  | 371.69#<br>(9.41-2,070.92) | 0  | 0.00<br>(0.00-1,149.53) | 0  | 0.00<br>(0.00-3,483.91) | 0 | 0.00<br>(0.00-14,844.09) | 1  | 138.76#<br>(3.51-773.11) |
| Congenital Anomalies                               | 3  | 8.30#<br>(1.71-24.25)      | 0  | 0.00<br>(0.00-8.60)     | 0  | 0.00<br>(0.00-23.50)    | 0 | 0.00<br>(0.00-75.74)     | 3  | 3.01<br>(0.62-8.80)      |
| Certain Conditions                                 | 0  | 0.00                       | 0  | 0.00                    | 0  | 0.00                    | 0 | 0.00                     | 0  | 0.00                     |

|                                            |     |                         |     |                       |    |                      |   |                      |     |                        |
|--------------------------------------------|-----|-------------------------|-----|-----------------------|----|----------------------|---|----------------------|-----|------------------------|
| Originating in Perinatal Period            |     | (0.00-2,347.01)         |     | (0.00-1,931.93)       |    | (0.00-5,193.54)      |   | (0.00-15,872.51)     |     | (0.00-833.86)          |
| Symptoms, Signs and Ill-Defined Conditions | 20  | 14.73#<br>(9.00-22.75)  | 14  | 9.12#<br>(4.98-15.29) | 1  | 1.87<br>(0.05-10.42) | 1 | 6.34<br>(0.16-35.32) | 36  | 10.04#<br>(7.03-13.90) |
| Accidents and Adverse Effects              | 18  | 2.24#<br>(1.33-3.54)    | 21  | 2.23#<br>(1.38-3.41)  | 10 | 2.90#<br>(1.39-5.33) | 0 | 0.00<br>(0.00-3.43)  | 49  | 2.23#<br>(1.65-2.95)   |
| Suicide and Self-Inflicted Injury          | 15  | 4.33#<br>(2.42-7.14)    | 11  | 2.65#<br>(1.32-4.74)  | 3  | 1.97<br>(0.41-5.75)  | 0 | 0.00<br>(0.00-8.14)  | 29  | 3.02#<br>(2.02-4.34)   |
| Homicide and Legal Intervention            | 0   | 0.00<br>(0.00-5.21)     | 3   | 3.97<br>(0.82-11.60)  | 0  | 0.00<br>(0.00-14.71) | 0 | 0.00<br>(0.00-50.26) | 3   | 1.68<br>(0.35-4.90)    |
| Other Cause of Death                       | 187 | 12.05#<br>(10.38-13.91) | 113 | 6.18#<br>(5.09-7.43)  | 28 | 4.14#<br>(2.75-5.99) | 5 | 2.39<br>(0.78-5.57)  | 333 | 7.81#<br>(6.99-8.69)   |

1 number of cancer patients who died due to each cause of death.

2 95% Confidence interval.

# P value less than .05.

**Supplementary table 3: Standardized mortality ratio (SMR) for each cause of death following esophageal cancer diagnosis aged older than 64 years.**

| Cause of Death | Less than a year | 1-5 years | 5-10 years | More than 10 years | Total |
|----------------|------------------|-----------|------------|--------------------|-------|
|----------------|------------------|-----------|------------|--------------------|-------|



|                                              | Observed <sup>1</sup> | SMR (95% CI <sup>2</sup> )       | Observed <sup>1</sup> | SMR (95% CI <sup>2</sup> ) | Observed <sup>1</sup> | SMR (95% CI <sup>2</sup> ) | Observed <sup>1</sup> | SMR (95% CI <sup>2</sup> ) | Observed <sup>1</sup> | SMR (95% CI <sup>2</sup> )       |
|----------------------------------------------|-----------------------|----------------------------------|-----------------------|----------------------------|-----------------------|----------------------------|-----------------------|----------------------------|-----------------------|----------------------------------|
| All Causes of Death                          | 20,872                | 19.15#<br>(18.89-19.41)          | 10,424                | 7.69#<br>(7.55-7.84)       | 1,752                 | 2.50#<br>(2.39-2.62)       | 657                   | 1.91#<br>(1.77-2.07)       | 33,705                | 9.66#<br>(9.56-9.77)             |
| All Malignant Cancer Causes of Death         | 18,496                | 72.29#<br>(71.25-73.34)          | 8,736                 | 26.93#<br>(26.36-27.50)    | 916                   | 5.71#<br>(5.35-6.09)       | 264                   | 3.66#<br>(3.23-4.13)       | 28,412                | 34.96#<br>(34.55-35.37)          |
| Esophageal Cancer Deaths                     | 16,816                | 2,297.46#<br>(2,262.86-2,332.45) | 7,769                 | 812.56#<br>(794.59-830.83) | 621                   | 130.80#<br>(120.72-141.51) | 140                   | 67.22#<br>(56.54-79.32)    | 25,346                | 1,068.95#<br>(1,055.83-1,082.20) |
| Non-cancer Causes of Death                   |                       |                                  |                       |                            |                       |                            |                       |                            |                       |                                  |
| In situ, benign or unknown behavior neoplasm | 56                    | 7.57#<br>(5.72-9.83)             | 34                    | 3.62#<br>(2.51-5.06)       | 13                    | 2.61<br>(1.39-4.47)        | 0                     | 0.00<br>(0.00-1.51)        | 103                   | 4.26#<br>(3.47-5.16)             |
| Tuberculosis                                 | 1                     | 3.69<br>(0.09-20.53)             | 0                     | 0.00<br>(0.00-11.84)       | 1                     | 6.79<br>(0.17-37.84)       | 0                     | 0.00<br>(0.00-58.79)       | 2                     | 2.52<br>(0.31-9.11)              |
| Syphilis                                     | 0                     | 0.00<br>(0.00-221.07)            | 0                     | 0.00<br>(0.00-182.57)      | 0                     | 0.00<br>(0.00-352.49)      | 0                     | 0.00<br>(0.00-783.64)      | 0                     | 0.00<br>(0.00-70.85)             |
| Septicemia                                   | 91                    | 5.78#<br>(4.65-7.10)             | 34                    | 3.62#<br>(2.51-5.06)       | 13                    | 2.61#<br>(1.39-4.47)       | 0                     | 0.00<br>(0.00-1.51)        | 193                   | 3.81#<br>(3.30-4.39)             |

|                                         |     |                      |     |                       |     |                       |     |                       |       |                      |
|-----------------------------------------|-----|----------------------|-----|-----------------------|-----|-----------------------|-----|-----------------------|-------|----------------------|
| Other Infectious Diseases               | 34  | 4.93#<br>(3.42-6.90) | 0   | 0.00<br>(0.00-11.84)  | 1   | 6.79<br>(0.17-37.84)  | 0   | 0.00<br>(0.00-58.79)  | 61    | 2.66#<br>(2.04-3.42) |
| Diabetes Mellitus                       | 60  | 1.84#<br>(1.41-2.37) | 0   | 0.00<br>(0.00-182.57) | 0   | 0.00<br>(0.00-352.49) | 0   | 0.00<br>(0.00-783.64) | 130   | 1.26#<br>(1.05-1.49) |
| Alzheimer's                             | 23  | 0.61#<br>(0.39-0.91) | 66  | 3.35#<br>(2.59-4.26)  | 26  | 2.55#<br>(1.67-3.74)  | 10  | 2.01<br>(0.97-3.70)   | 105   | 0.81#<br>(0.66-0.98) |
| Diseases of Heart                       | 851 | 2.76#<br>(2.58-2.96) | 17  | 1.88#<br>(1.10-3.01)  | 9   | 1.88<br>(0.86-3.58)   | 1   | 0.45<br>(0.01-2.52)   | 1,929 | 2.02#<br>(1.93-2.11) |
| Hypertension without Heart Disease      | 31  | 2.70#<br>(1.84-3.83) | 49  | 1.20<br>(0.89-1.59)   | 14  | 0.68<br>(0.37-1.15)   | 7   | 0.73<br>(0.29-1.51)   | 70    | 1.83#<br>(1.43-2.31) |
| Cerebrovascular Diseases                | 141 | 2.14#<br>(1.80-2.53) | 31  | 0.65#<br>(0.44-0.92)  | 32  | 1.14<br>(0.78-1.60)   | 19  | 1.14<br>(0.68-1.77)   | 301   | 1.49#<br>(1.33-1.67) |
| Atherosclerosis                         | 16  | 3.61#<br>(2.06-5.86) | 630 | 1.70#<br>(1.57-1.84)  | 306 | 1.64#<br>(1.46-1.84)  | 142 | 1.56#<br>(1.31-1.83)  | 27    | 2.20#<br>(1.45-3.20) |
| Aortic Aneurysm and Dissection          | 17  | 2.69#<br>(1.57-4.30) | 21  | 1.46<br>(0.90-2.23)   | 12  | 1.49<br>(0.77-2.60)   | 6   | 1.40<br>(0.51-3.05)   | 35    | 1.90#<br>(1.33-2.65) |
| Other Diseases of Arteries, Arterioles, | 7   | 1.55<br>(0.62-3.19)  | 85  | 1.09<br>(0.87-1.35)   | 54  | 1.39#<br>(1.04-1.81)  | 21  | 1.08<br>(0.67-1.65)   | 22    | 1.57<br>(0.98-2.37)  |

|                                                    |     |                          |     |                      |    |                      |    |                      |     |                          |
|----------------------------------------------------|-----|--------------------------|-----|----------------------|----|----------------------|----|----------------------|-----|--------------------------|
| Capillaries                                        |     |                          |     |                      |    |                      |    |                      |     |                          |
| Pneumonia and Influenza                            | 98  | 3.42#<br>(2.78-4.17)     | 8   | 1.67<br>(0.72-3.29)  | 2  | 0.95<br>(0.11-3.43)  | 1  | 1.07<br>(0.03-5.97)  | 209 | 2.38#<br>(2.07-2.73)     |
| Chronic Obstructive Pulmonary Disease              | 222 | 3.12#<br>(2.72-3.56)     | 14  | 1.89#<br>(1.04-3.18) | 2  | 0.61<br>(0.07-2.20)  | 2  | 1.45<br>(0.18-5.22)  | 582 | 2.52#<br>(2.32-2.73)     |
| Stomach and Duodenal Ulcers                        | 5   | 3.27#<br>(1.06-7.63)     | 9   | 1.65<br>(0.75-3.13)  | 3  | 1.10<br>(0.23-3.20)  | 3  | 2.27<br>(0.47-6.64)  | 10  | 2.19#<br>(1.05-4.02)     |
| Chronic Liver Disease and Cirrhosis                | 43  | 5.51#<br>(3.99-7.43)     | 60  | 1.78#<br>(1.36-2.29) | 35 | 2.05#<br>(1.43-2.86) | 16 | 1.92#<br>(1.10-3.11) | 69  | 2.69#<br>(2.09-3.41)     |
| Nephritis, Nephrotic Syndrome and Nephrosis        | 49  | 2.15#<br>(1.59-2.84)     | 211 | 2.33#<br>(2.02-2.66) | 97 | 2.07#<br>(1.68-2.53) | 52 | 2.33#<br>(1.74-3.06) | 105 | 1.43#<br>(1.17-1.73)     |
| Complications of Pregnancy, Childbirth, Puerperium | 0   | 0.00<br>(0.00-44,967.46) | 3   | 1.68<br>(0.35-4.90)  | 1  | 1.18<br>(0.03-6.55)  | 1  | 2.51<br>(0.06-13.98) | 0   | 0.00<br>(0.00-12,963.34) |
| Congenital Anomalies                               | 1   | 1.50<br>(0.04-8.36)      | 10  | 0.96<br>(0.46-1.77)  | 11 | 2.14#<br>(1.07-3.83) | 5  | 2.16<br>(0.70-5.05)  | 3   | 1.43<br>(0.29-4.17)      |

|                                                    |     |                         |     |                            |     |                          |    |                           |      |                          |
|----------------------------------------------------|-----|-------------------------|-----|----------------------------|-----|--------------------------|----|---------------------------|------|--------------------------|
| Certain Conditions Originating in Perinatal Period | 0   | 0.00<br>(0.00-1,333.36) | 30  | 1.05<br>(0.71-1.50)        | 16  | 1.07<br>(0.61-1.73)      | 10 | 1.37<br>(0.66-2.52)       | 1    | 112.55#<br>(2.85-627.06) |
| Symptoms, Signs and Ill-Defined Conditions         | 56  | 5.00#<br>(3.77-6.49)    | 0   | 0.00<br>(0.00-30,563.59)   | 0   | 0.00<br>(0.00-56,293.58) | 0  | 0.00<br>(0.00-226,263.15) | 102  | 2.78#<br>(2.27-3.38)     |
| Accidents and Adverse Effects                      | 44  | 1.71#<br>(1.24-2.29)    | 1   | 1.20<br>(0.03-6.66)        | 1   | 2.45<br>(0.06-13.66)     | 0  | 0.00<br>(0.00-19.40)      | 127  | 1.47#<br>(1.23-1.75)     |
| Suicide and Self-Inflicted Injury                  | 71  | 12.76#<br>(9.96-16.09)  | 1   | 279.12#<br>(7.07-1,555.14) | 0   | 0.00<br>(0.00-2,112.87)  | 0  | 0.00<br>(0.00-4,668.90)   | 100  | 5.41#<br>(4.40-6.58)     |
| Homicide and Legal Intervention                    | 0   | 0.00<br>(0.00-6.11)     | 31  | 2.22#<br>(1.51-3.15)       | 8   | 1.04<br>(0.45-2.04)      | 7  | 1.86<br>(0.75-3.83)       | 3    | 1.61<br>(0.33-4.71)      |
| Other Cause of Death                               | 459 | 2.92#<br>(2.66-3.20)    | 310 | 1.54#<br>(1.37-1.72)       | 161 | 1.41#<br>(1.20-1.65)     | 74 | 1.22<br>(0.96-1.53)       | 1004 | 1.88#<br>(1.77-2.00)     |

1 number of cancer patients who died due to each cause of death.

2 95% Confidence interval.

# P value less than .05.

**Supplementary table 4: Standardized mortality ratio (SMR) for each cause of death following esophagus cancer diagnosis in male.**

| Cause of Death                               | Less than a year      |                                  | 1-5 years             |                            | 5-10 years            |                            | More than 10 years    |                            | Total                 |                                  |
|----------------------------------------------|-----------------------|----------------------------------|-----------------------|----------------------------|-----------------------|----------------------------|-----------------------|----------------------------|-----------------------|----------------------------------|
|                                              | Observed <sup>1</sup> | SMR (95% CI <sup>2</sup> )       | Observed <sup>1</sup> | SMR (95% CI <sup>2</sup> ) | Observed <sup>1</sup> | SMR (95% CI <sup>2</sup> ) | Observed <sup>1</sup> | SMR (95% CI <sup>2</sup> ) | Observed <sup>1</sup> | SMR (95% CI <sup>2</sup> )       |
| All Causes of Death                          | 25,145                | 26.21#<br>(25.89-26.54)          | 13,181                | 11.08#<br>(10.89-11.27)    | 1,643                 | 2.80#<br>(2.66-2.94)       | 519                   | 1.89#<br>(1.73-2.06)       | 40,488                | 13.45#<br>(13.32-13.58)          |
| All Malignant Cancer Causes of Death         | 22,692                | 91.92#<br>(90.73-93.12)          | 11,508                | 37.36#<br>(36.68-38.05)    | 914                   | 6.27#<br>(5.87-6.69)       | 218                   | 3.48#<br>(3.03-3.97)       | 35,332                | 46.29#<br>(45.81-46.77)          |
| Esophageal Cancer Deaths                     | 20,536                | 2,340.23#<br>(2,308.33-2,372.46) | 10,258                | 917.96#<br>(900.28-935.90) | 626                   | 119.86#<br>(110.65-129.63) | 118                   | 54.47#<br>(45.09-65.23)    | 31,538                | 1,153.58#<br>(1,140.89-1,166.39) |
| Non-cancer Causes of Death                   |                       |                                  |                       |                            |                       |                            |                       |                            |                       |                                  |
| In situ, benign or unknown behavior neoplasm | 54                    | 8.42#<br>(6.33-10.99)            | 37                    | 4.54#<br>(3.19-6.25)       | 12                    | 2.84#<br>(1.47-4.96)       | 1                     | 0.50<br>(0.01-2.76)        | 104                   | 5.00#<br>(4.08-6.06)             |
| Tuberculosis                                 | 1                     | 3.61<br>(0.09-20.11)             | 0                     | 0.00<br>(0.00-11.85)       | 0                     | 0.00<br>(0.00-26.59)       | 0                     | 0.00<br>(0.00-65.29)       | 1                     | 1.28<br>(0.03-7.11)              |
| Syphilis                                     | 0                     | 0.00                             | 0                     | 0.00                       | 0                     | 0.00                       | 0                     | 0.00                       | 0                     | 0.00                             |

|                                    |     |                      |     |                      |     |                      |     |                      |       |                      |
|------------------------------------|-----|----------------------|-----|----------------------|-----|----------------------|-----|----------------------|-------|----------------------|
|                                    |     | (0.00-218.66)        |     | (0.00-182.11)        |     | (0.00-373.18)        |     | (0.00-893.40)        |       | (0.00-72.13)         |
| Septicemia                         | 105 | 7.82#<br>(6.39-9.46) | 69  | 4.11#<br>(3.20-5.20) | 21  | 2.50#<br>(1.55-3.82) | 9   | 2.28#<br>(1.04-4.33) | 204   | 4.79#<br>(4.16-5.50) |
| Other Infectious Diseases          | 65  | 7.63#<br>(5.89-9.72) | 30  | 2.89#<br>(1.95-4.13) | 8   | 1.68<br>(0.72-3.30)  | 1   | 0.50<br>(0.01-2.81)  | 104   | 4.06#<br>(3.31-4.91) |
| Diabetes Mellitus                  | 56  | 1.86#<br>(1.41-2.42) | 46  | 1.23<br>(0.90-1.64)  | 14  | 0.77<br>(0.42-1.30)  | 4   | 0.49<br>(0.13-1.26)  | 120   | 1.28#<br>(1.06-1.53) |
| Alzheimer's                        | 11  | 0.48#<br>(0.24-0.86) | 21  | 0.71<br>(0.44-1.08)  | 20  | 1.14<br>(0.70-1.76)  | 16  | 1.57<br>(0.90-2.55)  | 68    | 0.85<br>(0.66-1.07)  |
| Diseases of Heart                  | 848 | 3.15#<br>(2.95-3.37) | 580 | 1.78#<br>(1.64-1.93) | 274 | 1.74#<br>(1.54-1.96) | 107 | 1.45#<br>(1.19-1.75) | 1,809 | 2.19#<br>(2.09-2.29) |
| Hypertension without Heart Disease | 25  | 2.82#<br>(1.82-4.16) | 17  | 1.51<br>(0.88-2.42)  | 9   | 1.49<br>(0.68-2.83)  | 5   | 1.62<br>(0.53-3.79)  | 56    | 1.92#<br>(1.45-2.49) |
| Cerebrovascular Diseases           | 136 | 2.74#<br>(2.30-3.24) | 79  | 1.33#<br>(1.05-1.66) | 31  | 1.07<br>(0.73-1.53)  | 15  | 1.08<br>(0.61-1.78)  | 261   | 1.72#<br>(1.52-1.94) |
| Atherosclerosis                    | 15  | 4.72#<br>(2.64-7.78) | 7   | 1.98<br>(0.79-4.07)  | 1   | 0.65<br>(0.02-3.62)  | 0   | 0.00<br>(0.00-5.54)  | 23    | 2.58#<br>(1.63-3.87) |
| Aortic Aneurysm and Dissection     | 18  | 3.05#<br>(1.81-4.82) | 15  | 2.19#<br>(1.22-3.61) | 2   | 0.68<br>(0.08-2.47)  | 2   | 1.70<br>(0.21-6.14)  | 37    | 2.19#<br>(1.55-3.02) |

|                                                     |     |                      |     |                      |    |                      |    |                      |     |                      |
|-----------------------------------------------------|-----|----------------------|-----|----------------------|----|----------------------|----|----------------------|-----|----------------------|
| Other Diseases of Arteries, Arterioles, Capillaries | 9   | 2.46#<br>(1.12-4.66) | 10  | 2.23#<br>(1.07-4.11) | 4  | 1.83<br>(0.50-4.70)  | 1  | 0.99<br>(0.02-5.50)  | 24  | 2.12#<br>(1.36-3.15) |
| Pneumonia and Influenza                             | 94  | 4.12#<br>(3.33-5.04) | 63  | 2.31#<br>(1.77-2.95) | 29 | 2.14#<br>(1.43-3.08) | 13 | 2.01#<br>(1.07-3.44) | 199 | 2.84#<br>(2.46-3.26) |
| Chronic Obstructive Pulmonary Disease               | 184 | 3.07#<br>(2.65-3.55) | 178 | 2.34#<br>(2.01-2.71) | 82 | 2.14#<br>(1.70-2.66) | 44 | 2.49#<br>(1.81-3.35) | 488 | 2.54#<br>(2.32-2.78) |
| Stomach and Duodenal Ulcers                         | 5   | 3.71#<br>(1.20-8.65) | 5   | 3.15#<br>(1.02-7.36) | 1  | 1.38<br>(0.03-7.69)  | 0  | 0.00<br>(0.00-11.42) | 11  | 2.76#<br>(1.38-4.94) |
| Chronic Liver Disease and Cirrhosis                 | 73  | 6.24#<br>(4.89-7.85) | 27  | 1.84#<br>(1.21-2.68) | 13 | 2.01#<br>(1.07-3.43) | 6  | 2.31<br>(0.85-5.03)  | 119 | 3.36#<br>(2.78-4.02) |
| Nephritis, Nephrotic Syndrome and Nephrosis         | 53  | 2.74#<br>(2.05-3.58) | 29  | 1.20<br>(0.80-1.72)  | 15 | 1.21<br>(0.68-2.00)  | 8  | 1.36<br>(0.59-2.68)  | 105 | 1.70#<br>(1.39-2.06) |
| Complications of Pregnancy, Childbirth, Puerperium  | 0   | 0.00<br>(0.00-0.00)  | 0   | 0.00<br>(0.00-0.00)  | 0  | 0.00<br>(0.00-0.00)  | 0  | 0.00<br>(0.00-0.00)  | 0   | 0.00<br>(0.00-0.00)  |

|                                                    |     |                       |     |                            |     |                         |    |                        |      |                         |
|----------------------------------------------------|-----|-----------------------|-----|----------------------------|-----|-------------------------|----|------------------------|------|-------------------------|
| Congenital Anomalies                               | 4   | 4.75#<br>(1.29-12.15) | 0   | 0.00<br>(0.00-3.60)        | 1   | 2.23<br>(0.06-12.41)    | 0  | 0.00<br>(0.00-19.75)   | 5    | 2.00<br>(0.65-4.66)     |
| Certain Conditions Originating in Perinatal Period | 0   | 0.00<br>(0.00-882.86) | 1   | 193.89#<br>(4.91-1,080.30) | 0   | 0.00<br>(0.00-1,656.39) | 0  | 0.00<br>(0.00-4152.87) | 1    | 80.31#<br>(2.03-447.48) |
| Symptoms, Signs and Ill-Defined Conditions         | 60  | 6.82#<br>(5.20-8.77)  | 37  | 3.36#<br>(2.36-4.63)       | 7   | 1.22<br>(0.49-2.52)     | 6  | 2.24<br>(0.82-4.88)    | 110  | 3.90#<br>(3.20-4.70)    |
| Accidents and Adverse Effects                      | 45  | 1.55#<br>(1.13-2.07)  | 62  | 1.71#<br>(1.31-2.19)       | 29  | 1.64#<br>(1.10-2.35)    | 11 | 1.32<br>(0.66-2.37)    | 147  | 1.61#<br>(1.36-1.89)    |
| Suicide and Self-Inflicted Injury                  | 87  | 9.42#<br>(7.55-11.62) | 32  | 2.76#<br>(1.89-3.90)       | 8   | 1.54<br>(0.67-3.04)     | 4  | 1.89<br>(0.51-4.83)    | 131  | 4.66#<br>(3.90-5.53)    |
| Homicide and Legal Intervention                    | 0   | 0.00<br>(0.00-2.67)   | 5   | 3.32#<br>(1.08-7.74)       | 0   | 0.00<br>(0.00-6.55)     | 0  | 0.00<br>(0.00-18.46)   | 5    | 1.37<br>(0.44-3.20)     |
| Other Cause of Death                               | 505 | 4.00#<br>(3.65-4.36)  | 323 | 1.98#<br>(1.77-2.21)       | 148 | 1.67#<br>(1.41-1.96)    | 48 | 1.06<br>(0.78-1.41)    | 1024 | 2.42#<br>(2.27-2.57)    |

1 number of cancer patients who died due to each cause of death.

2 95% Confidence interval.

# P value less than .05.



**Supplementary table 5: Standardized mortality ratio (SMR) for each cause of death following esophageal cancer diagnosis in female.**

| Cause of Death                               | Less than a year      |                                  | 1-5 years             |                                  | 5-10 years            |                            | More than 10 years    |                            | Total                 |                                  |
|----------------------------------------------|-----------------------|----------------------------------|-----------------------|----------------------------------|-----------------------|----------------------------|-----------------------|----------------------------|-----------------------|----------------------------------|
|                                              | Observed <sup>1</sup> | SMR (95% CI <sup>2</sup> )       | Observed <sup>1</sup> | SMR (95% CI <sup>2</sup> )       | Observed <sup>1</sup> | SMR (95% CI <sup>2</sup> ) | Observed <sup>1</sup> | SMR (95% CI <sup>2</sup> ) | Observed <sup>1</sup> | SMR (95% CI <sup>2</sup> )       |
| All Causes of Death                          | 7,778                 | 27.02#<br>(26.42-27.63)          | 3,550                 | 10.35#<br>(10.01-10.69)          | 491                   | 2.81#<br>(2.57-3.07)       | 196                   | 2.24#<br>(1.94-2.58)       | 12,015                | 13.45#<br>(13.21-13.70)          |
| All Malignant Cancer Causes of Death         | 7,004                 | 122.32#<br>(119.47-125.22)       | 3,050                 | 42.61#<br>(41.11-44.15)          | 256                   | 7.56#<br>(6.66-8.54)       | 75                    | 4.98#<br>(3.92-6.24)       | 10,385                | 58.41#<br>(57.3-59.55)           |
| Esophageal Cancer Deaths                     | 6,337                 | 9,680.38#<br>(9,443.49-9,921.71) | 2,722                 | 3,359.21#<br>(3,234.19-3,487.82) | 174                   | 459.83#<br>(394.04-533.46) | 38                    | 228.02#<br>(161.36-312.98) | 9,271                 | 4,612.47#<br>(4,519.05-4,707.33) |
| Non-cancer Causes of Death                   |                       |                                  |                       |                                  |                       |                            |                       |                            |                       |                                  |
| In situ, benign or unknown behavior neoplasm | 21                    | 12.68#<br>(7.85-19.38)           | 10                    | 4.99#<br>(2.39-9.18)             | 3                     | 2.94#<br>(0.61-8.60)       | 0                     | 0.00<br>(0.00-7.29)        | 34                    | 6.56#<br>(4.54-9.16)             |
| Tuberculosis                                 | 0                     | 0.00<br>(0.00-68.07)             | 0                     | 0.00<br>(0.00-60.03)             | 1                     | 36.15<br>(0.92-201.42)     | 0                     | 0.00<br>(0.00-321.96)      | 1                     | 6.46<br>(0.16-36.00)             |

|                                    |     |                         |     |                       |    |                         |    |                         |     |                       |
|------------------------------------|-----|-------------------------|-----|-----------------------|----|-------------------------|----|-------------------------|-----|-----------------------|
| Syphilis                           | 0   | 0.00<br>(0.00-1,069.34) | 0   | 0.00<br>(0.00-992.56) | 0  | 0.00<br>(0.00-1,979.13) | 0  | 0.00<br>(0.00-3,751.89) | 0   | 0.00<br>(0.00-368.40) |
| Septicemia                         | 31  | 6.97#<br>(4.74-9.89)    | 23  | 4.30#<br>(2.73-6.46)  | 10 | 3.73#<br>(1.79-6.86)    | 3  | 2.34<br>(0.48-6.83)     | 67  | 4.87#<br>(3.77-6.19)  |
| Other Infectious Diseases          | 14  | 6.96#<br>(3.81-11.68)   | 8   | 3.15#<br>(1.36-6.21)  | 4  | 3.11<br>(0.85-7.96)     | 0  | 0.00<br>(0.00-6.37)     | 26  | 4.05#<br>(2.65-5.94)  |
| Diabetes Mellitus                  | 20  | 2.37#<br>(1.45-3.66)    | 6   | 0.60<br>(0.22-1.30)   | 2  | 0.42<br>(0.05-1.51)     | 3  | 1.38<br>(0.29-4.04)     | 31  | 1.22<br>(0.83-1.73)   |
| Alzheimer's                        | 13  | 0.86<br>(0.46-1.47)     | 11  | 0.60<br>(0.30-1.07)   | 12 | 1.12<br>(0.58-1.95)     | 3  | 0.46<br>(0.09-1.34)     | 39  | 0.77<br>(0.55-1.05)   |
| Diseases of Heart                  | 233 | 2.99#<br>(2.62-3.40)    | 175 | 1.98#<br>(1.70-2.30)  | 75 | 1.72#<br>(1.35-2.15)    | 47 | 2.16#<br>(1.58-2.87)    | 530 | 2.29#<br>(2.10-2.49)  |
| Hypertension without Heart Disease | 18  | 4.58#<br>(2.71-7.23)    | 9   | 1.92<br>(0.88-3.64)   | 4  | 1.54<br>(0.42-3.94)     | 2  | 1.44<br>(0.17-5.20)     | 33  | 2.61#<br>(1.80-3.67)  |
| Cerebrovascular Diseases           | 44  | 2.04#<br>(1.48-2.74)    | 27  | 1.11<br>(0.73-1.61)   | 27 | 2.23#<br>(1.47-3.24)    | 7  | 1.12<br>(0.45-2.32)     | 105 | 1.63#<br>(1.34-1.98)  |
| Atherosclerosis                    | 5   | 3.44#<br>(1.12-8.02)    | 2   | 1.36<br>(0.17-4.92)   | 1  | 1.56<br>(0.04-8.67)     | 1  | 3.49<br>(0.09-19.42)    | 9   | 2.34#<br>(1.07-4.44)  |

|                                                     |    |                             |    |                       |    |                        |    |                        |     |                          |
|-----------------------------------------------------|----|-----------------------------|----|-----------------------|----|------------------------|----|------------------------|-----|--------------------------|
| Aortic Aneurysm and Dissection                      | 2  | 1.65<br>(0.20-5.98)         | 0  | 0.00<br>(0.00-2.65)   | 0  | 0.00<br>(0.00-5.78)    | 0  | 0.00<br>(0.00-12.85)   | 2   | 0.57<br>(0.07-2.05)      |
| Other Diseases of Arteries, Arterioles, Capillaries | 3  | 2.34<br>(0.48-6.83)         | 0  | 0.00<br>(0.00-2.51)   | 0  | 0.00<br>(0.00-5.04)    | 2  | 5.53<br>(0.67-19.96)   | 5   | 1.30<br>(0.42-3.03)      |
| Pneumonia and Influenza                             | 36 | 4.64#<br>(3.25-6.43)        | 18 | 2.08#<br>(1.23-3.28)  | 9  | 2.10<br>(0.96-3.98)    | 4  | 1.88<br>(0.51-4.82)    | 67  | 2.93#<br>(2.27-3.72)     |
| Chronic Obstructive Pulmonary Disease               | 89 | 5.12#<br>(4.12-6.31)        | 65 | 2.97#<br>(2.29-3.78)  | 25 | 2.25#<br>(1.46-3.32)   | 11 | 2.01#<br>(1.00-3.59)   | 190 | 3.40#<br>(2.94-3.92)     |
| Stomach and Duodenal Ulcers                         | 1  | 2.41<br>(0.06-13.43)        | 0  | 0.00<br>(0.00-7.94)   | 1  | 4.65<br>(0.12-25.88)   | 1  | 9.76<br>(0.25-54.36)   | 3   | 2.50<br>(0.52-7.32)      |
| Chronic Liver Disease and Cirrhosis                 | 11 | 6.42#<br>(3.21-11.49)       | 4  | 1.79<br>(0.49-4.57)   | 2  | 1.95<br>(0.24-7.05)    | 1  | 2.28<br>(0.06-12.68)   | 18  | 3.32#<br>(1.97-5.25)     |
| Nephritis, Nephrotic Syndrome and Nephrosis         | 17 | 3.00#<br>(1.74-4.80)        | 9  | 1.32<br>(0.60-2.51)   | 3  | 0.86<br>(0.18-2.50)    | 2  | 1.18<br>(0.14-4.27)    | 31  | 1.75#<br>(1.19-2.49)     |
| Complications of Pregnancy,                         | 2  | 349.51#<br>(42.33-1,262.53) | 0  | 0.00<br>(0.00-562.86) | 0  | 0.00<br>(0.00-1,731.7) | 0  | 0.00<br>(0.00-6,411.7) | 2   | 133.50#<br>(16.17-482.2) |

| Childbirth,<br>Puerperium                          |     |                         |     |                         |    | 4)                       |    | 5)                       |     | 3)                      |
|----------------------------------------------------|-----|-------------------------|-----|-------------------------|----|--------------------------|----|--------------------------|-----|-------------------------|
| Congenital Anomalies                               | 0   | 0.00<br>(0.00-16.25)    | 1   | 3.60<br>(0.09-20.06)    | 0  | 0.00<br>(0.00-29.58)     | 0  | 0.00<br>(0.00-67.75)     | 1   | 1.46<br>(0.04-8.15)     |
| Certain Conditions Originating in Perinatal Period | 0   | 0.00<br>(0.00-7,018.10) | 0   | 0.00<br>(0.00-5,516.09) | 0  | 0.00<br>(0.00-12,022.10) | 0  | 0.00<br>(0.00-24,462.90) | 0   | 0.00<br>(0.00-2,232.97) |
| Symptoms, Signs and Ill-Defined Conditions         | 21  | 5.34#<br>(3.30-8.16)    | 10  | 2.16#<br>(1.04-3.97)    | 2  | 0.78<br>(0.09-2.82)      | 2  | 1.59<br>(0.19-5.76)      | 35  | 2.83#<br>(1.97-3.93)    |
| Accidents and Adverse Effects                      | 22  | 3.49#<br>(2.19-5.29)    | 8   | 1.03<br>(0.44-2.03)     | 9  | 2.20#<br>(1.01-4.18)     | 1  | 0.46<br>(0.01-2.58)      | 40  | 1.97#<br>(1.41-2.68)    |
| Suicide and Self-Inflicted Injury                  | 2   | 4.13<br>(0.50-14.94)    | 1   | 1.56<br>(0.04-8.68)     | 0  | 0.00<br>(0.00-13.17)     | 0  | 0.00<br>(0.00-33.05)     | 3   | 1.98<br>(0.41-5.78)     |
| Homicide and Legal Intervention                    | 0   | 0.00<br>(0.00-22.31)    | 1   | 5.02<br>(0.13-27.95)    | 0  | 0.00<br>(0.00-43.94)     | 0  | 0.00<br>(0.00-111.49)    | 1   | 2.08<br>(0.05-11.57)    |
| Other Cause of Death                               | 169 | 3.57#<br>(3.05-4.15)    | 112 | 1.93#<br>(1.59-2.32)    | 45 | 1.39#<br>(1.02-1.86)     | 31 | 1.77<br>(1.20-2.51)      | 357 | 2.30#<br>(2.07-2.55)    |

**1** number of cancer patients who died due to each cause of death.

**2** 95% Confidence interval.

# P value less than .05.

**Supplementary table 6: Standardized mortality ratio (SMR) for each cause of death following esophageal cancer diagnosis in white.**

| Cause of Death                               | Less than a year      |                                  | 1-5 years             |                                | 5-10 years            |                            | More than 10 years    |                            | Total                 |                                  |
|----------------------------------------------|-----------------------|----------------------------------|-----------------------|--------------------------------|-----------------------|----------------------------|-----------------------|----------------------------|-----------------------|----------------------------------|
|                                              | Observed <sup>1</sup> | SMR (95% CI <sup>2</sup> )       | Observed <sup>1</sup> | SMR (95% CI <sup>2</sup> )     | Observed <sup>1</sup> | SMR (95% CI <sup>2</sup> ) | Observed <sup>1</sup> | SMR (95% CI <sup>2</sup> ) | Observed <sup>1</sup> | SMR (95% CI <sup>2</sup> )       |
| All Causes of Death                          | 27,054                | 24.85#<br>(24.55-25.15)          | 14,236                | 10.44#<br>(10.27-10.61)        | 1,842                 | 2.71#<br>(2.58-2.83)       | 629                   | 1.93#<br>(1.78-2.09)       | 43,761                | 12.65#<br>(12.53-12.77)          |
| All Malignant Cancer Causes of Death         | 24,380                | 92.51#<br>(91.35-93.68)          | 12,379                | 36.83#<br>(36.18-37.48)        | 1,007                 | 6.29#<br>(5.91-6.69)       | 253                   | 3.63#<br>(3.20-4.11)       | 38,019                | 45.83#<br>(45.37-46.30)          |
| Esophageal Cancer Deaths                     | 22,090                | 2,629.58#<br>(2,595.02-2,664.49) | 11,054                | 1,009.83#<br>(991.09-1,028.83) | 699                   | 134.65#<br>(124.85-145.01) | 137                   | 62.75#<br>(52.68-74.18)    | 33,980                | 1,271.63#<br>(1,258.15-1,285.23) |
| Non-cancer Causes of Death                   |                       |                                  |                       |                                |                       |                            |                       |                            |                       |                                  |
| In situ, benign or unknown behavior neoplasm | 67                    | 9.17#<br>(7.11-11.65)            | 42                    | 4.51#<br>(3.25-6.09)           | 13                    | 2.70#<br>(1.44-4.62)       | 1                     | 0.43<br>(0.01-2.39)        | 123                   | 5.17#<br>(4.30-6.17)             |

|                                    |     |                        |     |                        |     |                        |     |                          |       |                        |
|------------------------------------|-----|------------------------|-----|------------------------|-----|------------------------|-----|--------------------------|-------|------------------------|
| Tuberculosis                       | 0   | 0.00#<br>(0.00-19.47)  | 0   | 0.00#<br>(0.00-16.32)  | 1   | 9.98#<br>(0.25-55.60)  | 0   | 0.00#<br>(0.00-85.62)    | 1     | 1.79#<br>(0.05-9.97)   |
| Syphilis                           | 0   | 0.00#<br>(0.00-345.08) | 0   | 0.00#<br>(0.00-262.63) | 0   | 0.00#<br>(0.00-512.55) | 0   | 0.00#<br>(0.00-1,172.35) | 0     | 0.00#<br>(0.00-105.16) |
| Septicemia                         | 111 | 7.53#<br>(6.20-9.07)   | 77  | 4.10#<br>(3.24-5.13)   | 24  | 2.53#<br>(1.62-3.76)   | 8   | 1.76#<br>(0.76-3.46)     | 220   | 4.63#<br>(4.04-5.28)   |
| Other Infectious Diseases          | 49  | 5.97#<br>(4.42-7.89)   | 25  | 2.36#<br>(1.53-3.48)   | 8   | 1.56#<br>(0.67-3.06)   | 0   | 0.00#<br>(0.00-1.66)     | 82    | 3.13#<br>(2.49-3.89)   |
| Diabetes Mellitus                  | 63  | 2.02#<br>(1.55-2.59)   | 45  | 1.14#<br>(0.83-1.52)   | 14  | 0.73#<br>(0.40-1.22)   | 7   | 0.80#<br>(0.32-1.66)     | 129   | 1.31#<br>(1.09-1.55)   |
| Alzheimer's                        | 20  | 0.57#<br>(0.35-0.88)   | 30  | 0.67#<br>(0.45-0.96)   | 30  | 1.16#<br>(0.78-1.65)   | 19  | 1.23#<br>(0.74-1.93)     | 99    | 0.82#<br>(0.67-1.00)   |
| Diseases of Heart                  | 911 | 3.00#<br>(2.81-3.21)   | 645 | 1.75#<br>(1.62-1.89)   | 299 | 1.66#<br>(1.48-1.86)   | 138 | 1.60#<br>(1.34-1.89)     | 1,993 | 2.12#<br>(2.03-2.22)   |
| Hypertension without Heart Disease | 32  | 3.17#<br>(2.17-4.47)   | 17  | 1.31#<br>(0.76-2.10)   | 12  | 1.70#<br>(0.88-2.96)   | 7   | 1.88#<br>(0.75-3.87)     | 68    | 2.01#<br>(1.56-2.54)   |
| Cerebrovascular Diseases           | 144 | 2.38#<br>(2.01-2.80)   | 91  | 1.26#<br>(1.01-1.54)   | 48  | 1.35#<br>(1.00-1.79)   | 19  | 1.08#<br>(0.65-1.68)     | 302   | 1.62#<br>(1.45-1.82)   |

|                                                     |     |                      |     |                      |    |                      |    |                       |     |                      |
|-----------------------------------------------------|-----|----------------------|-----|----------------------|----|----------------------|----|-----------------------|-----|----------------------|
| Atherosclerosis                                     | 19  | 4.53#<br>(2.73-7.07) | 9   | 1.97#<br>(0.90-3.74) | 2  | 1.01#<br>(0.12-3.64) | 1  | 1.15#<br>(0.03-6.39)  | 31  | 2.67#<br>(1.81-3.78) |
| Aortic Aneurysm and Dissection                      | 18  | 2.82#<br>(1.67-4.45) | 13  | 1.73#<br>(0.92-2.96) | 2  | 0.62#<br>(0.07-2.22) | 2  | 1.49#<br>(0.18-5.38)  | 35  | 1.89#<br>(1.32-2.63) |
| Other Diseases of Arteries, Arterioles, Capillaries | 11  | 2.59#<br>(1.29-4.63) | 10  | 1.92#<br>(0.92-3.53) | 4  | 1.56#<br>(0.43-4.00) | 3  | 2.47#<br>(0.51-7.21)  | 28  | 2.11#<br>(1.41-3.06) |
| Pneumonia and Influenza                             | 102 | 3.83#<br>(3.12-4.64) | 65  | 2.04#<br>(1.58-2.61) | 33 | 2.11#<br>(1.45-2.96) | 13 | 1.71#<br>(0.91-2.92)  | 213 | 2.61#<br>(2.27-2.98) |
| Chronic Obstructive Pulmonary Disease               | 242 | 3.40#<br>(2.99-3.86) | 218 | 2.39#<br>(2.08-2.73) | 98 | 2.13#<br>(1.73-2.59) | 51 | 2.36#<br>(1.76-3.11)  | 609 | 2.65#<br>(2.44-2.87) |
| Stomach and Duodenal Ulcers                         | 4   | 2.63#<br>(0.72-6.73) | 5   | 2.77#<br>(0.90-6.47) | 1  | 1.21#<br>(0.03-6.73) | 1  | 2.63#<br>(0.07-14.64) | 11  | 2.43#<br>(1.21-4.34) |
| Chronic Liver Disease and Cirrhosis                 | 73  | 6.13#<br>(4.80-7.70) | 26  | 1.69#<br>(1.10-2.48) | 15 | 2.18#<br>(1.22-3.59) | 7  | 2.50#<br>(1.00-5.14)  | 121 | 3.27#<br>(2.71-3.91) |
| Nephritis, Nephrotic Syndrome and Nephrosis         | 50  | 2.44#<br>(1.81-3.22) | 31  | 1.19#<br>(0.81-1.69) | 17 | 1.27#<br>(0.74-2.03) | 9  | 1.39#<br>(0.63-2.64)  | 107 | 1.61#<br>(1.32-1.95) |

|                                                    |     |                            |     |                        |     |                          |    |                          |      |                          |
|----------------------------------------------------|-----|----------------------------|-----|------------------------|-----|--------------------------|----|--------------------------|------|--------------------------|
| Complications of Pregnancy, Childbirth, Puerperium | 1   | 319.82#<br>(8.10-1,781.90) | 0   | 0.00#<br>(0.00-959.71) | 0   | 0.00#<br>(0.00-2,836.81) | 0  | 0.00#<br>(0.00-7,957.39) | 1    | 114.49#<br>(2.90-637.89) |
| Congenital Anomalies                               | 2   | 2.10#<br>(0.25-7.60)       | 0   | 0.00#<br>(0.00-3.12)   | 1   | 1.91#<br>(0.05-10.66)    | 0  | 0.00#<br>(0.00-16.72)    | 3    | 1.04#<br>(0.22-3.05)     |
| Certain Conditions Originating in Perinatal Period | 0   | 0.00#<br>(0.00-957.62)     | 0   | 0.00#<br>(0.00-741.19) | 0   | 0.00#<br>(0.00-1,673.12) | 0  | 0.00#<br>(0.00-4,159.59) | 0    | 0.00#<br>(0.00-309.45)   |
| Symptoms, Signs and Ill-Defined Conditions         | 62  | 5.52#<br>(4.23-7.08)       | 38  | 2.70#<br>(1.91-3.71)   | 7   | 0.94#<br>(0.38-1.93)     | 6  | 1.67#<br>(0.61-3.64)     | 113  | 3.11#<br>(2.56-3.74)     |
| Accidents and Adverse Effects                      | 53  | 1.69#<br>(1.27-2.22)       | 61  | 1.53#<br>(1.17-1.97)   | 34  | 1.71#<br>(1.18-2.39)     | 10 | 1.04#<br>(0.50-1.91)     | 158  | 1.57#<br>(1.34-1.84)     |
| Suicide and Self-Inflicted Injury                  | 81  | 8.81#<br>(7.00-10.95)      | 32  | 2.74#<br>(1.87-3.86)   | 8   | 1.52#<br>(0.66-3.00)     | 3  | 1.39#<br>(0.29-4.07)     | 124  | 4.38#<br>(3.64-5.22)     |
| Homicide and Legal Intervention                    | 0   | 0.00#<br>(0.00-3.63)       | 3   | 2.45#<br>(0.50-7.15)   | 0   | 0.00#<br>(0.00-7.53)     | 0  | 0.00#<br>(0.00-20.55)    | 3    | 1.03#<br>(0.21-3.01)     |
| Other Cause of Death                               | 559 | 3.62#<br>(3.32-3.93)       | 374 | 1.87#<br>(1.69-2.07)   | 164 | 1.50#<br>(1.28-1.75)     | 71 | 1.24<br>(0.97-1.57)      | 1168 | 2.24#<br>(2.12-2.38)     |

1 number of cancer patients who died due to each cause of death.



2 95% Confidence interval.

# P value less than .05.

**Supplementary table 7: Standardized mortality ratio (SMR) for each cause of death following esophageal cancer diagnosis in Black.**

| Cause of Death                               | Less than a year      |                                  | 1-5 years             |                                  | 5-10 years            |                            | More than 10 years    |                            | Total                 |                                  |
|----------------------------------------------|-----------------------|----------------------------------|-----------------------|----------------------------------|-----------------------|----------------------------|-----------------------|----------------------------|-----------------------|----------------------------------|
|                                              | Observed <sup>1</sup> | SMR (95% CI <sup>2</sup> )       | Observed <sup>1</sup> | SMR (95% CI <sup>2</sup> )       | Observed <sup>1</sup> | SMR (95% CI <sup>2</sup> ) | Observed <sup>1</sup> | SMR (95% CI <sup>2</sup> ) | Observed <sup>1</sup> | SMR (95% CI <sup>2</sup> )       |
| All Causes of Death                          | 4,237                 | 35.74#<br>(34.67-36.83)          | 1,715                 | 13.88#<br>(13.23-14.56)          | 209                   | 3.73#<br>(3.24-4.27)       | 57                    | 2.30#<br>(1.74-2.98)       | 6,218                 | 19.26#<br>(18.78-19.74)          |
| All Malignant Cancer Causes of Death         | 3,809                 | 123.35#<br>(119.47-127.33)       | 1,469                 | 45.59#<br>(43.29-47.98)          | 113                   | 8.16#<br>(6.73-9.82)       | 29                    | 5.06#<br>(3.39-7.27)       | 5,420                 | 65.56#<br>(63.83-67.33)          |
| Esophageal Cancer Deaths                     | 3,395                 | 4,146.31#<br>(4,008.00-4,288.18) | 1,299                 | 1,625.19#<br>(1,538.00-1,716.03) | 67                    | 222.98#<br>(172.81-283.18) | 10                    | 90.67#<br>(43.48-166.75)   | 4,771                 | 2,351.58#<br>(2,285.32-2,419.27) |
| Non-cancer Causes of Death                   |                       |                                  |                       |                                  |                       |                            |                       |                            |                       |                                  |
| In situ, benign or unknown behavior neoplasm | 5                     | 9.70#<br>(3.15-22.64)            | 4                     | 7.27#<br>(1.98-18.61)            | 2                     | 7.69#<br>(0.93-27.79)      | 0                     | 0.00<br>(0.00-30.33)       | 11                    | 7.60#<br>(3.79-13.60)            |

|                                    |     |                        |    |                        |    |                        |    |                          |     |                        |
|------------------------------------|-----|------------------------|----|------------------------|----|------------------------|----|--------------------------|-----|------------------------|
| Tuberculosis                       | 0   | 0.00#<br>(0.00-56.93)  | 0  | 0.00#<br>(0.00-60.77)  | 0  | 0.00#<br>(0.00-178.46) | 0  | 0.00#<br>(0.00-507.41)   | 0   | 0.00#<br>(0.00-24.04)  |
| Syphilis                           | 0   | 0.00#<br>(0.00-412.10) | 0  | 0.00#<br>(0.00-400.26) | 0  | 0.00#<br>(0.00-880.19) | 0  | 0.00#<br>(0.00-2,044.14) | 0   | 0.00#<br>(0.00-152.67) |
| Septicemia                         | 17  | 6.47#<br>(3.77-10.35)  | 13 | 4.70#<br>(2.50-8.04)   | 7  | 5.59#<br>(2.25-11.52)  | 2  | 3.72#<br>(0.45-13.44)    | 39  | 5.43#<br>(3.86-7.42)   |
| Other Infectious Diseases          | 28  | 14.44#<br>(9.60-20.87) | 12 | 6.46#<br>(3.34-11.29)  | 4  | 5.75#<br>(1.57-14.72)  | 1  | 3.89#<br>(0.10-21.68)    | 45  | 9.48#<br>(6.91-12.68)  |
| Diabetes Mellitus                  | 8   | 1.44#<br>(0.62-2.83)   | 6  | 1.03#<br>(0.38-2.24)   | 2  | 0.77#<br>(0.09-2.78)   | 0  | 0.00#<br>(0.00-3.29)     | 16  | 1.06#<br>(0.61-1.72)   |
| Alzheimer's                        | 3   | 1.47#<br>(0.30-4.29)   | 2  | 0.86#<br>(0.10-3.09)   | 2  | 1.36#<br>(0.16-4.90)   | 0  | 0.00#<br>(0.00-4.20)     | 7   | 1.04#<br>(0.42-2.14)   |
| Diseases of Heart                  | 135 | 4.08#<br>(3.42-4.83)   | 82 | 2.42#<br>(1.93-3.01)   | 38 | 2.54#<br>(1.80-3.49)   | 12 | 1.84#<br>(0.95-3.21)     | 267 | 3.02#<br>(2.67-3.41)   |
| Hypertension without Heart Disease | 9   | 4.32#<br>(1.97-8.20)   | 9  | 4.04#<br>(1.85-7.67)   | 1  | 0.92#<br>(0.02-5.11)   | 0  | 0.00#<br>(0.00-7.28)     | 19  | 3.22#<br>(1.94-5.02)   |
| Cerebrovascular Diseases           | 29  | 3.82#<br>(2.56-5.49)   | 11 | 1.41#<br>(0.70-2.53)   | 6  | 1.71#<br>(0.63-3.71)   | 2  | 1.24#<br>(0.15-4.48)     | 48  | 2.34#<br>(1.73-3.10)   |
| Atherosclerosis                    | 1   | 3.08#                  | 0  | 0.00#                  | 0  | 0.00#                  | 0  | 0.00#                    | 1   | 1.21#                  |

|                                                     |    |                       |    |                       |   |                        |   |                        |    |                       |
|-----------------------------------------------------|----|-----------------------|----|-----------------------|---|------------------------|---|------------------------|----|-----------------------|
|                                                     |    | (0.08-17.16)          |    | (0.00-11.66)          |   | (0.00-27.69)           |   | (0.00-67.81)           |    | (0.03-6.72)           |
| Aortic Aneurysm and Dissection                      | 1  | 2.11#<br>(0.05-11.78) | 1  | 2.16#<br>(0.05-12.04) | 0 | 0.00#<br>(0.00-20.33)  | 0 | 0.00#<br>(0.00-51.08)  | 2  | 1.68#<br>(0.20-6.08)  |
| Other Diseases of Arteries, Arterioles, Capillaries | 1  | 1.73#<br>(0.04-9.61)  | 0  | 0.00#<br>(0.00-6.12)  | 0 | 0.00#<br>(0.00-13.07)  | 0 | 0.00#<br>(0.00-28.68)  | 1  | 0.63#<br>(0.02-3.50)  |
| Pneumonia and Influenza                             | 24 | 9.91#<br>(6.35-14.74) | 11 | 4.37#<br>(2.18-7.82)  | 1 | 0.86#<br>(0.02-4.81)   | 2 | 3.89#<br>(0.47-14.04)  | 38 | 5.75#<br>(4.07-7.89)  |
| Chronic Obstructive Pulmonary Disease               | 25 | 5.75#<br>(3.72-8.49)  | 18 | 3.83#<br>(2.27-6.06)  | 7 | 3.15#<br>(1.26-6.48)   | 2 | 1.94#<br>(0.24-7.02)   | 52 | 4.23#<br>(3.16-5.55)  |
| Stomach and Duodenal Ulcers                         | 0  | 0.00#<br>(0.00-24.65) | 0  | 0.00#<br>(0.00-25.01) | 1 | 17.06#<br>(0.43-95.07) | 0 | 0.00#<br>(0.00-157.06) | 1  | 2.64#<br>(0.07-14.69) |
| Chronic Liver Disease and Cirrhosis                 | 7  | 6.48#<br>(2.61-13.36) | 3  | 2.83#<br>(0.58-8.26)  | 0 | 0.00#<br>(0.00-9.19)   | 0 | 0.00#<br>(0.00-24.04)  | 10 | 3.71#<br>(1.78-6.82)  |
| Nephritis, Nephrotic Syndrome and Nephrosis         | 19 | 5.19#<br>(3.13-8.11)  | 6  | 1.53#<br>(0.56-3.32)  | 0 | 0.00#<br>(0.00-20.00)  | 0 | 0.00#<br>(0.00-4.49)   | 25 | 2.44#<br>(1.58-3.60)  |
| Complications of Pregnancy,                         | 1  | 412.82#               | 0  | 0.00#                 | 0 | 0.00#                  | 0 | 0.00#                  | 1  | 174.58#               |

|                                                          |    |                          |    |                                   |    |                               |   |                               |     |                                 |
|----------------------------------------------------------|----|--------------------------|----|-----------------------------------|----|-------------------------------|---|-------------------------------|-----|---------------------------------|
| Childbirth,<br>Puerperium                                |    | (10.45-2,300.10)         |    | (0.00-1,484.41<br>)               |    | (0.00-4,965.5<br>7)           |   | (0.00-47,418.<br>13)          |     | (4.42-972.68<br>)               |
| Congenital<br>Anomalies                                  | 2  | 21.98#<br>(2.66-79.41)   | 1  | 11.09#<br>(0.28-61.76)            | 0  | 0.00#<br>(0.00-103.18)        | 0 | 0.00#<br>(0.00-259.47)        | 3   | 12.98#<br>(2.68-37.93)          |
| Certain Conditions<br>Originating in<br>Perinatal Period | 0  | 0.00#<br>(0.00-5,672.87) | 1  | 1,492.27#<br>(37.78-8,314.3<br>8) | 0  | 0.00#<br>(0.00-14,909.<br>39) | 0 | 0.00#<br>(0.00-46,244.<br>42) | 1   | 606.95#<br>(15.37-3,381<br>.72) |
| Symptoms, Signs<br>and Ill-Defined<br>Conditions         | 18 | 14.94#<br>(8.85-23.61)   | 7  | 5.60#<br>(2.25-11.54)             | 2  | 3.23#<br>(0.39-11.66)         | 1 | 3.96#<br>(0.10-22.09)         | 28  | 8.42#<br>(5.59-12.17)           |
| Accidents and<br>Adverse Effects                         | 12 | 4.09#<br>(2.11-7.14)     | 7  | 2.38#<br>(0.96-4.91)              | 3  | 2.49#<br>(0.51-7.26)          | 2 | 3.78#<br>(0.46-13.66)         | 24  | 3.15#<br>(2.02-4.69)            |
| Suicide and<br>Self-Inflicted<br>Injury                  | 0  | 0.00#<br>(0.00-12.56)    | 1  | 3.60#<br>(0.09-20.04)             | 0  | 0.00#<br>(0.00-36.06)         | 0 | 0.00#<br>(0.00-94.12)         | 1   | 1.40#<br>(0.04-7.81)            |
| Homicide and<br>Legal Intervention                       | 0  | 0.00#<br>(0.00-7.83)     | 3  | 7.18#<br>(1.48-20.97)             | 0  | 0.00#<br>(0.00-27.44)         | 0 | 0.00#<br>(0.00-80.47)         | 3   | 2.80#<br>(0.58-8.20)            |
| Other Cause of<br>Death                                  | 83 | 5.87#<br>(4.68-7.28)     | 48 | 3.13#<br>(2.31-4.15)              | 20 | 2.53#<br>(1.55-3.91)          | 4 | 1.04<br>(0.28-2.67)           | 155 | 3.76#<br>(3.19-4.40)            |

**1** number of cancer patients who died due to each cause of death.

**2** 95% Confidence interval.

# P value less than .05.

**Supplementary table 8: Standardized mortality ratio (SMR) for each cause of death following esophageal cancer diagnosis in Asian or Pacific Islander.**

| Cause of Death                               | Less than a year      |                                  | 1-5 years             |                                  | 5-10 years            |                            | More than 10 years    |                            | Total                 |                                  |
|----------------------------------------------|-----------------------|----------------------------------|-----------------------|----------------------------------|-----------------------|----------------------------|-----------------------|----------------------------|-----------------------|----------------------------------|
|                                              | Observed <sup>1</sup> | SMR (95% CI <sup>2</sup> )       | Observed <sup>1</sup> | SMR (95% CI <sup>2</sup> )       | Observed <sup>1</sup> | SMR (95% CI <sup>2</sup> ) | Observed <sup>1</sup> | SMR (95% CI <sup>2</sup> ) | Observed <sup>1</sup> | SMR (95% CI <sup>2</sup> )       |
| All Causes of Death                          | 1,460                 | 39.17#<br>(37.19-41.24)          | 710                   | 16.54#<br>(15.35-17.81)          | 74                    | 3.15#<br>(2.47-3.96)       | 27                    | 2.63#<br>(1.73-3.82)       | 2,271                 | 19.93#<br>(19.12-20.77)          |
| All Malignant Cancer Causes of Death         | 1,350                 | 149.50#<br>(141.63-157.69)       | 645                   | 61.25#<br>(56.62-66.17)          | 42                    | 8.03#<br>(5.79-10.86)      | 11                    | 5.21#<br>(2.60-9.32)       | 2,048                 | 76.13#<br>(72.87-79.50)          |
| Esophageal Cancer Deaths                     | 1,240                 | 6,367.89#<br>(6,018.35-6,732.44) | 568                   | 2,574.12#<br>(2,366.76-2,794.79) | 27                    | 270.19#<br>(178.05-393.11) | 9                     | 247.81#<br>(113.32-470.42) | 1,844                 | 3,342.80#<br>(3,191.95-3,498.93) |
| Non-cancer Causes of Death                   |                       |                                  |                       |                                  |                       |                            |                       |                            |                       |                                  |
| In situ, benign or unknown behavior neoplasm | 1                     | 4.29<br>(0.11-23.93)             | 1                     | 3.65<br>(0.09-20.35)             | 0                     | 0.00<br>(0.00-23.74)       | 0                     | 0.00<br>(0.00-54.92)       | 2                     | 2.74<br>(0.33-9.91)              |

|                                          |    |                          |    |                              |    |                               |   |                               |    |                              |
|------------------------------------------|----|--------------------------|----|------------------------------|----|-------------------------------|---|-------------------------------|----|------------------------------|
| Tuberculosis                             | 1  | 13.91#<br>(0.35-77.50)   | 0  | 0.00#<br>(0.00-45.98)        | 0  | 0.00#<br>(0.00-87.54)         | 0 | 0.00#<br>(0.00-226.39)        | 1  | 4.75#<br>(0.12-26.46)        |
| Syphilis                                 | 0  | 0.00#<br>(0.00-5,775.31) | 0  | 0.00#<br>(0.00-5,606.74<br>) | 0  | 0.00#<br>(0.00-10,977.<br>38) | 0 | 0.00#<br>(0.00-24,661.<br>76) | 0  | 0.00#<br>(0.00-2,069.<br>74) |
| Septicemia                               | 8  | 16.52#<br>(7.13-32.55)   | 2  | 3.54#<br>(0.43-12.77)        | 0  | 0.00#<br>(0.00-12.01)         | 2 | 15.27#<br>(1.85-55.16)        | 12 | 8.06#<br>(4.17-14.09)        |
| Other Infectious<br>Diseases             | 2  | 5.60#<br>(0.68-20.25)    | 1  | 2.41#<br>(0.06-13.43)        | 0  | 0.00#<br>(0.00-17.90)         | 0 | 0.00#<br>(0.00-45.34)         | 3  | 2.83#<br>(0.58-8.28)         |
| Diabetes Mellitus                        | 4  | 2.41#<br>(0.66-6.18)     | 0  | 0.00#<br>(0.00-1.90)         | 0  | 0.00#<br>(0.00-3.62)          | 0 | 0.00#<br>(0.00-8.46)          | 4  | 0.79#<br>(0.22-2.03)         |
| Alzheimer's                              | 1  | 1.11#<br>(0.03-6.18)     | 0  | 0.00#<br>(0.00-3.30)         | 0  | 0.00#<br>(0.00-4.53)          | 0 | 0.00#<br>(0.00-8.00)          | 1  | 0.30#<br>(0.01-1.69)         |
| Diseases of Heart                        | 32 | 3.29#<br>(2.25-4.65)     | 27 | 2.48#<br>(1.63-3.60)         | 11 | 1.87#<br>(0.93-3.34)          | 4 | 1.57#<br>(0.43-4.03)          | 74 | 2.55#<br>(2.00-3.20)         |
| Hypertension<br>without Heart<br>Disease | 2  | 3.39#<br>(0.41-12.26)    | 0  | 0.00#<br>(0.00-5.23)         | 0  | 0.00#<br>(0.00-8.31)          | 0 | 0.00#<br>(0.00-16.93)         | 2  | 1.02#<br>(0.12-3.69)         |
| Cerebrovascular<br>Diseases              | 7  | 2.40#<br>(0.97-4.95)     | 4  | 1.21#<br>(0.33-3.10)         | 4  | 2.25#<br>(0.61-5.75)          | 1 | 1.26#<br>(0.03-7.04)          | 16 | 1.82#<br>(1.04-2.96)         |
| Atherosclerosis                          | 0  | 0.00#                    | 0  | 0.00#                        | 0  | 0.00#                         | 0 | 0.00#                         | 0  | 0.00#                        |

|                                                     |   |                        |   |                       |   |                       |   |                        |    |                       |
|-----------------------------------------------------|---|------------------------|---|-----------------------|---|-----------------------|---|------------------------|----|-----------------------|
|                                                     |   | (0.00-34.79)           |   | (0.00-32.93)          |   | (0.00-61.98)          |   | (0.00-147.84)          |    | (0.00-12.19)          |
| Aortic Aneurysm and Dissection                      | 1 | 4.23#<br>(0.11-23.57)  | 1 | 3.83#<br>(0.10-21.34) | 0 | 0.00#<br>(0.00-30.07) | 0 | 0.00#<br>(0.00-80.84)  | 2  | 3.00#<br>(0.36-10.85) |
| Other Diseases of Arteries, Arterioles, Capillaries | 0 | 0.00#<br>(0.00-33.74)  | 0 | 0.00#<br>(0.00-29.67) | 0 | 0.00#<br>(0.00-55.24) | 0 | 0.00#<br>(0.00-128.19) | 0  | 0.00#<br>(0.00-11.21) |
| Pneumonia and Influenza                             | 4 | 2.84#<br>(0.77-7.28)   | 5 | 3.18#<br>(1.03-7.41)  | 4 | 4.20#<br>(1.14-10.74) | 2 | 4.62#<br>(0.56-16.70)  | 15 | 3.43#<br>(1.92-5.67)  |
| Chronic Obstructive Pulmonary Disease               | 6 | 3.61#<br>(1.33-7.86)   | 6 | 3.18#<br>(1.17-6.91)  | 2 | 1.85#<br>(0.22-6.67)  | 2 | 4.26#<br>(0.52-15.38)  | 16 | 3.14#<br>(1.79-5.09)  |
| Stomach and Duodenal Ulcers                         | 2 | 23.29#<br>(2.82-84.12) | 0 | 0.00#<br>(0.00-39.21) | 0 | 0.00#<br>(0.00-74.84) | 0 | 0.00#<br>(0.00-182.73) | 2  | 8.02#<br>(0.97-28.96) |
| Chronic Liver Disease and Cirrhosis                 | 2 | 5.30#<br>(0.64-19.14)  | 1 | 2.32#<br>(0.06-12.91) | 0 | 0.00#<br>(0.00-19.68) | 0 | 0.00#<br>(0.00-52.06)  | 3  | 2.81#<br>(0.58-8.21)  |
| Nephritis, Nephrotic Syndrome and Nephrosis         | 0 | 0.00#<br>(0.00-4.47)   | 1 | 1.03#<br>(0.03-5.75)  | 1 | 1.80#<br>(0.05-10.02) | 0 | 0.00#<br>(0.00-15.05)  | 2  | 0.77#<br>(0.09-2.78)  |
| Complications of Pregnancy,                         | 0 | 0.00#                  | 0 | 0.00#                 | 0 | 0.00#                 | 0 | 0.00#                  | 0  | 0.00#                 |

|                                                    |    |                           |    |                           |   |                           |   |                           |    |                          |
|----------------------------------------------------|----|---------------------------|----|---------------------------|---|---------------------------|---|---------------------------|----|--------------------------|
| Childbirth, Puerperium                             |    | (0.00-23,380.46)          |    | (0.00-17,863.83)          |   | (0.00-44,035.08)          |   | (0.00-108,633.24)         |    | (0.00-7,653.20)          |
| Congenital Anomalies                               | 0  | 0.00#<br>(0.00-144.33)    | 0  | 0.00#<br>(0.00-127.62)    | 0 | 0.00#<br>(0.00-264.43)    | 0 | 0.00#<br>(0.00-621.22)    | 0  | 0.00#<br>(0.00-49.61)    |
| Certain Conditions Originating in Perinatal Period | 0  | 0.00#<br>(0.00-19,430.80) | 0  | 0.00#<br>(0.00-21,838.80) | 0 | 0.00#<br>(0.00-51,198.17) | 0 | 0.00#<br>(0.00-55,815.45) | 0  | 0.00#<br>(0.00-7,423.75) |
| Symptoms, Signs and Ill-Defined Conditions         | 1  | 3.57#<br>(0.09-19.92)     | 2  | 6.13#<br>(0.74-22.13)     | 0 | 0.00#<br>(0.00-18.61)     | 1 | 11.57#<br>(0.29-64.48)    | 4  | 4.49#<br>(1.22-11.50)    |
| Accidents and Adverse Effects                      | 1  | 0.91#<br>(0.02-5.08)      | 2  | 1.60#<br>(0.19-5.77)      | 1 | 1.50#<br>(0.04-8.33)      | 0 | 0.00#<br>(0.00-12.60)     | 4  | 1.21#<br>(0.33-3.09)     |
| Suicide and Self-Inflicted Injury                  | 6  | 28.79#<br>(10.57-62.66)   | 0  | 0.00#<br>(0.00-16.12)     | 0 | 0.00#<br>(0.00-38.47)     | 1 | 28.37#<br>(0.72-158.08)   | 7  | 12.31#<br>(4.95-25.37)   |
| Homicide and Legal Intervention                    | 0  | 0.00#<br>(0.00-68.81)     | 0  | 0.00#<br>(0.00-65.00)     | 0 | 0.00#<br>(0.00-179.11)    | 0 | 0.00#<br>(0.00-508.45)    | 0  | 0.00#<br>(0.00-26.69)    |
| Other Cause of Death                               | 29 | 6.00#<br>(4.02-8.62)      | 12 | 2.09#<br>(1.08-3.66)      | 9 | 2.55#<br>(1.17-4.85)      | 3 | 1.80<br>(0.37-5.27)       | 53 | 3.36#<br>(2.52-4.40)     |

1 number of cancer patients who died due to each cause of death.

2 95% Confidence interval.



# P value less than .05.

**Supplementary table 9: Standardized mortality ratio (SMR) for each cause of death following esophageal cancer diagnosis in Indian American or Alaska Native.**

| Cause of Death                               | Less than a year      |                                   | 1-5 years             |                                  | 5-10 years            |                              | More than 10 years    |                            | Total                 |                                  |
|----------------------------------------------|-----------------------|-----------------------------------|-----------------------|----------------------------------|-----------------------|------------------------------|-----------------------|----------------------------|-----------------------|----------------------------------|
|                                              | Observed <sup>1</sup> | SMR (95% CI <sup>2</sup> )        | Observed <sup>1</sup> | SMR (95% CI <sup>2</sup> )       | Observed <sup>1</sup> | SMR (95% CI <sup>2</sup> )   | Observed <sup>1</sup> | SMR (95% CI <sup>2</sup> ) | Observed <sup>1</sup> | SMR (95% CI <sup>2</sup> )       |
| All Causes of Death                          | 172                   | 66.11#<br>(56.60-76.76)           | 70                    | 24.30#<br>(18.94-30.7)           | 9                     | 5.16#<br>(2.36-9.80)         | 2                     | 2.81<br>(0.34-10.17)       | 253                   | 31.88#<br>(28.07-36.06)          |
| All Malignant Cancer Causes of Death         | 157                   | 232.15#<br>(197.26-271.44)        | 65                    | 85.13#<br>(65.70-108.51)         | 8                     | 19.06#<br>(8.23-37.55)       | 0                     | 0.00<br>(0.00-22.78)       | 230                   | 113.78#<br>(99.55-129.47)        |
| Esophageal Cancer Deaths                     | 148                   | 9,424.93#<br>(7,967.69-11,071.56) | 59                    | 3,139.20#<br>(2,389.71-4,049.34) | 7                     | 729.93#<br>(293.47-1,503.93) | 0                     | 0.00<br>(0.00-1,192.01)    | 214                   | 4,535.60#<br>(3,948.24-5,185.72) |
| Non-cancer Causes of Death                   |                       |                                   |                       |                                  |                       |                              |                       |                            |                       |                                  |
| In situ, benign or unknown behavior neoplasm | 2                     | 125.10#<br>(15.15-451.91)         | 0                     | 0.00<br>(0.00-205.36)            | 0                     | 0.00<br>(0.93-319.23)        | 0                     | 0.00<br>(0.00-757.04)      | 2                     | 39.70#<br>(4.81-143.42)          |

|                                    |   |                          |   |                          |   |                           |   |                           |   |                          |
|------------------------------------|---|--------------------------|---|--------------------------|---|---------------------------|---|---------------------------|---|--------------------------|
| Tuberculosis                       | 0 | 0.00<br>(0.00-718.76)    | 0 | 0.00<br>(0.00-643.99)    | 0 | 0.00<br>(0.00-1,101.21)   | 0 | 0.00<br>(0.00-2,810.59)   | 0 | 0.00<br>(0.00-237.64)    |
| Syphilis                           | 0 | 0.00<br>(0.00-91,972.54) | 0 | 0.00<br>(0.00-69,842.65) | 0 | 0.00<br>(0.00-149,241.23) | 0 | 0.00<br>(0.00-321,184.35) | 0 | 0.00<br>(0.00-28,567.55) |
| Septicemia                         | 0 | 0.00<br>(0.00-110.12)    | 0 | 0.00<br>(0.00-98.14)     | 0 | 0.00<br>(0.00-161.24)     | 0 | 0.00<br>(0.00-396.21)     | 0 | 0.00<br>(0.00-35.72)     |
| Other Infectious Diseases          | 0 | 0.00<br>(0.00-129.37)    | 0 | 0.00<br>(0.00-119.44)    | 0 | 0.00<br>(0.00-237.45)     | 0 | 0.00<br>(0.00-625.66)     | 0 | 0.00<br>(0.00-45.64)     |
| Diabetes Mellitus                  | 1 | 8.31<br>(0.21-46.32)     | 1 | 7.52<br>(0.19-41.90)     | 0 | 0.00<br>(0.00-47.66)      | 0 | 0.00<br>(0.00-117.49)     | 2 | 5.52<br>(0.67-19.96)     |
| Alzheimer's                        | 0 | 0.00<br>(0.00-80.2)      | 0 | 0.00<br>(0.00-81.73)     | 0 | 0.00<br>(0.00-83.52)      | 0 | 0.00<br>(0.00-148.44)     | 0 | 0.00<br>(0.00-23.03)     |
| Diseases of Heart                  | 3 | 4.50<br>(0.93-13.14)     | 1 | 1.36<br>(0.03-7.56)      | 1 | 2.25<br>(0.06-12.56)      | 0 | 0.00<br>(0.00-21.20)      | 5 | 2.47<br>(0.80-5.77)      |
| Hypertension without Heart Disease | 0 | 0.00<br>(0.00-100.42)    | 0 | 0.00<br>(0.00-92.31)     | 0 | 0.00<br>(0.00-127.17)     | 0 | 0.00<br>(0.00-275.91)     | 0 | 0.00<br>(0.00-30.98)     |
| Cerebrovascular Diseases           | 0 | 0.00<br>(0.00-19.30)     | 0 | 0.00<br>(0.00-18.43)     | 0 | 0.00<br>(0.00-30.17)      | 0 | 0.00<br>(0.00-71.02)      | 0 | 0.00<br>(0.00-6.52)      |

|                                                     |   |                         |   |                        |   |                       |   |                         |   |                        |
|-----------------------------------------------------|---|-------------------------|---|------------------------|---|-----------------------|---|-------------------------|---|------------------------|
| Atherosclerosis                                     | 0 | 0.00<br>(0.00-543.39)   | 0 | 0.00<br>(0.00-516.54)  | 0 | 0.00<br>(0.00-951.68) | 0 | 0.00<br>(0.00-2,423.57) | 0 | 0.00<br>(0.00-190.85)  |
| Aortic Aneurysm and Dissection                      | 0 | 0.00<br>(0.00-226.23)   | 0 | 0.00<br>(0.00-208.66)  | 0 | 0.00<br>(0.00-384.38) | 0 | 0.00<br>(0.00-1,123.80) | 0 | 0.00<br>(0.00-78.72)   |
| Other Diseases of Arteries, Arterioles, Capillaries | 0 | 0.00<br>(0.00-487.32)   | 0 | 0.00<br>(0.00-459.82)  | 0 | 0.00<br>(0.00-811.13) | 0 | 0.00<br>(0.00-2,007.26) | 0 | 0.00<br>(0.00-167.85)  |
| Pneumonia and Influenza                             | 0 | 0.00<br>(0.00-41.00)    | 0 | 0.00<br>(0.00-35.76)   | 0 | 0.00<br>(0.00-52.19)  | 0 | 0.00<br>(0.00-128.98)   | 0 | 0.00<br>(0.00-12.61)   |
| Chronic Obstructive Pulmonary Disease               | 0 | 0.00<br>(0.00-33.25)    | 1 | 7.87<br>(0.20-43.82)   | 0 | 0.00<br>(0.00-43.95)  | 0 | 0.00<br>(0.00-104.59)   | 1 | 2.80<br>(0.07-15.59)   |
| Stomach and Duodenal Ulcers                         | 0 | 0.00<br>(0.00-650.63)   | 0 | 0.00<br>(0.00-584.35)  | 0 | 0.00<br>(0.00-972.42) | 0 | 0.00<br>(0.00-2,665.59) | 0 | 0.00<br>(0.00-214.97)  |
| Chronic Liver Disease and Cirrhosis                 | 2 | 57.13#<br>(6.92-206.38) | 1 | 25.91<br>(0.66-144.37) | 0 | 0.00<br>(0.00-226.66) | 0 | 0.00<br>(0.00-780.72)   | 3 | 31.71#<br>(6.54-92.68) |

|                                                    |   |                           |   |                           |   |                             |   |                           |   |                          |
|----------------------------------------------------|---|---------------------------|---|---------------------------|---|-----------------------------|---|---------------------------|---|--------------------------|
| Nephritis, Nephrotic Syndrome and Nephrosis        | 1 | 17.99<br>(0.46-100.21)    | 0 | 0.00<br>(0.00-58.82)      | 0 | 0.00<br>(0.00-90.51)        | 1 | 58.45#<br>(1.48-325.69)   | 2 | 11.35#<br>(1.37-41.01)   |
| Complications of Pregnancy, Childbirth, Puerperium | 0 | 0.00<br>(0.00-238,732.48) | 0 | 0.00<br>(0.00-199,238.77) | 0 | 0.00<br>(0.00-1,176,611.46) | 0 | 0.00<br>(0.00-0.00)       | 0 | 0.00<br>(0.00-99,425.41) |
| Congenital Anomalies                               | 0 | 0.00<br>(0.00-1,756.93)   | 0 | 0.00<br>(0.00-1,622.23)   | 0 | 0.00<br>(0.00-3,238.10)     | 0 | 0.00<br>(0.00-8,826.97)   | 0 | 0.00<br>(0.00-622.00)    |
| Certain Conditions Originating in Perinatal Period | 0 | 0.00<br>(0.00-315,183.18) | 0 | 0.00<br>(0.00-361,164.84) | 0 | 0.00<br>(0.00-382,421.32)   | 0 | 0.00<br>(0.00-579,104.24) | 0 | 0.00<br>(0.00-97,245.06) |
| Symptoms, Signs and Ill-Defined Conditions         | 0 | 0.00<br>(0.00-196.48)     | 0 | 0.00<br>(0.00-179.88)     | 0 | 0.00<br>(0.00-275.79)       | 0 | 0.00<br>(0.00-785.9)      | 0 | 0.00<br>(0.00-64.32)     |
| Accidents and Adverse Effects                      | 1 | 11.59<br>(0.29-64.59)     | 0 | 0.00<br>(0.00-38.71)      | 0 | 0.00<br>(0.00-69.56)        | 0 | 0.00<br>(0.00-176.55)     | 1 | 3.91<br>(0.10-21.81)     |
| Suicide and Self-Inflicted Injury                  | 2 | 96.41#<br>(11.68-348.27)  | 0 | 0.00<br>(0.00-161.94)     | 0 | 0.00<br>(0.00-390.06)       | 0 | 0.00<br>(0.00-1,408.74)   | 2 | 35.97#<br>(4.36-129.94)  |

|                                 |   |                       |   |                       |   |                         |   |                         |   |                       |
|---------------------------------|---|-----------------------|---|-----------------------|---|-------------------------|---|-------------------------|---|-----------------------|
| Homicide and Legal Intervention | 0 | 0.00<br>(0.00-631.52) | 0 | 0.00<br>(0.00-644.21) | 0 | 0.00<br>(0.00-1,904.95) | 0 | 0.00<br>(0.00-9,537.73) | 0 | 0.00<br>(0.00-265.56) |
| Other Cause of Death            | 3 | 9.40#<br>(1.94-27.47) | 1 | 2.84<br>(0.07-15.82)  | 0 | 0.00<br>(0.00-15.32)    | 1 | 9.18<br>(0.23-51.15)    | 5 | 4.90#<br>(1.59-11.43) |

1 number of cancer patients who died due to each cause of death.

2 95% Confidence interval.

# P value less than .05.

**Supplementary table 10: Standardized mortality ratio (SMR) for each cause of death following localized esophageal cancer diagnosis.**

| Cause of Death                       | Less than a year      |                            | 1-5 years             |                            | 5-10 years            |                            | More than 10 years    |                            | Total                 |                            |
|--------------------------------------|-----------------------|----------------------------|-----------------------|----------------------------|-----------------------|----------------------------|-----------------------|----------------------------|-----------------------|----------------------------|
|                                      | Observed <sup>1</sup> | SMR (95% CI <sup>2</sup> ) | Observed <sup>1</sup> | SMR (95% CI <sup>2</sup> ) | Observed <sup>1</sup> | SMR (95% CI <sup>2</sup> ) | Observed <sup>1</sup> | SMR (95% CI <sup>2</sup> ) | Observed <sup>1</sup> | SMR (95% CI <sup>2</sup> ) |
| All Causes of Death                  | 3,117                 | 11.74#<br>(11.33-12.16)    | 2,543                 | 5.02#<br>(4.83-5.22)       | 631                   | 2.26#<br>(2.09-2.44)       | 134                   | 1.71#<br>(1.43-2.03)       | 6,425                 | 5.69#<br>(5.55-5.83)       |
| All Malignant Cancer Causes of Death | 2,516                 | 40.41#<br>(38.85-42.02)    | 1,907                 | 15.67#<br>(14.98-16.39)    | 306                   | 4.79#<br>(4.27-5.36)       | 49                    | 3.05#<br>(2.25-4.03)       | 4,778                 | 18.11#<br>(17.60-18.63)    |
| Esophageal                           | 2,292                 | 1,209.09#                  | 1,664                 | 430.38#                    | 207                   | 101.68#                    | 24                    | 48.78#                     | 4,187                 | 505.08#                    |

|                                              |     |                       |     |                       |     |                       |    |                         |     |                       |
|----------------------------------------------|-----|-----------------------|-----|-----------------------|-----|-----------------------|----|-------------------------|-----|-----------------------|
| Cancer Deaths                                |     | (1,160.09-1,259.63)   |     | (409.94-451.56)       |     | (88.30-116.51)        |    | (31.26-72.58)           |     | (489.89-520.61)       |
| Non-cancer Causes of Death                   |     |                       |     |                       |     |                       |    |                         |     |                       |
| In situ, benign or unknown behavior neoplasm | 10  | 5.59#<br>(2.68-10.29) | 10  | 2.87#<br>(1.37-5.27)  | 9   | 4.58#<br>(2.09-8.69)  | 0  | 0.00<br>(0.00-6.79)     | 29  | 3.72#<br>(2.49-5.35)  |
| Tuberculosis                                 | 1   | 16.66<br>(0.42-92.80) | 0   | 0.00<br>(0.00-34.25)  | 0   | 0.00<br>(0.00-67.01)  | 0  | 0.00<br>(0.00-239.69)   | 1   | 4.20<br>(0.11-23.39)  |
| Syphilis                                     | 0   | 0.00<br>(0.00-935.18) | 0   | 0.00<br>(0.00-510.49) | 0   | 0.00<br>(0.00-941.43) | 0  | 0.00<br>(0.00-3,788.62) | 0   | 0.00<br>(0.00-229.65) |
| Septicemia                                   | 24  | 6.28#<br>(4.03-9.35)  | 24  | 3.29#<br>(2.11-4.90)  | 9   | 2.24#<br>(1.02-4.25)  | 1  | 0.89<br>(0.02-4.98)     | 58  | 3.57#<br>(2.71-4.62)  |
| Other Infectious Diseases                    | 9   | 4.15#<br>(1.90-7.89)  | 11  | 2.65#<br>(1.32-4.74)  | 4   | 1.89<br>(0.51-4.83)   | 0  | 0.00<br>(0.00-7.05)     | 24  | 2.68#<br>(1.72-3.99)  |
| Diabetes Mellitus                            | 18  | 2.28#<br>(1.35-3.60)  | 22  | 1.45<br>(0.91-2.19)   | 8   | 0.98<br>(0.42-1.93)   | 2  | 0.92<br>(0.11-3.31)     | 50  | 1.49#<br>(1.11-1.97)  |
| Alzheimer's                                  | 6   | 0.63<br>(0.23-1.38)   | 10  | 0.56<br>(0.27-1.03)   | 13  | 1.16<br>(0.62-1.99)   | 11 | 2.76#<br>(1.38-4.93)    | 40  | 0.94<br>(0.67-1.28)   |
| Diseases of Heart                            | 196 | 2.71#<br>(2.34-3.11)  | 222 | 1.65#<br>(1.44-1.88)  | 113 | 1.54#<br>(1.27-1.86)  | 21 | 1.01<br>(0.62-1.54)     | 552 | 1.84#<br>(1.69-1.99)  |

|                                                     |    |                       |    |                      |    |                      |    |                       |     |                      |
|-----------------------------------------------------|----|-----------------------|----|----------------------|----|----------------------|----|-----------------------|-----|----------------------|
| Hypertension without Heart Disease                  | 11 | 3.80#<br>(1.90-6.81)  | 9  | 1.64<br>(0.75-3.12)  | 6  | 1.86<br>(0.68-4.05)  | 2  | 2.00<br>(0.24-7.22)   | 28  | 2.22#<br>(1.48-3.21) |
| Cerebrovascular Diseases                            | 37 | 2.50#<br>(1.76-3.45)  | 26 | 0.97<br>(0.63-1.42)  | 17 | 1.15<br>(0.67-1.84)  | 7  | 1.58<br>(0.64-3.26)   | 87  | 1.43#<br>(1.14-1.76) |
| Atherosclerosis                                     | 0  | 0.00<br>(0.00-4.11)   | 0  | 0.00<br>(0.00-2.48)  | 0  | 0.00<br>(0.00-5.00)  | 1  | 5.12<br>(0.13-28.50)  | 1   | 0.30<br>(0.01-1.68)  |
| Aortic Aneurysm and Dissection                      | 3  | 2.18<br>(0.45-6.36)   | 2  | 0.80<br>(0.10-2.90)  | 0  | 0.00<br>(0.00-3.07)  | 2  | 6.59<br>(0.80-23.81)  | 7   | 1.30<br>(0.52-2.68)  |
| Other Diseases of Arteries, Arterioles, Capillaries | 3  | 2.88<br>(0.59-8.43)   | 3  | 1.55<br>(0.32-4.54)  | 1  | 0.95<br>(0.02-5.32)  | 0  | 0.00<br>(0.00-12.56)  | 7   | 1.62<br>(0.65-3.35)  |
| Pneumonia and Influenza                             | 22 | 3.38#<br>(2.12-5.12)  | 17 | 1.44<br>(0.84-2.31)  | 10 | 1.55<br>(0.74-2.85)  | 4  | 2.11<br>(0.58-5.41)   | 53  | 1.99#<br>(1.49-2.60) |
| Chronic Obstructive Pulmonary Disease               | 53 | 3.14#<br>(2.35-4.11)  | 89 | 2.69#<br>(2.16-3.31) | 32 | 1.75#<br>(1.20-2.48) | 10 | 2.03<br>(0.97-3.73)   | 184 | 2.52#<br>(2.17-2.91) |
| Stomach and Duodenal Ulcers                         | 3  | 8.71#<br>(1.80-25.46) | 1  | 1.58<br>(0.04-8.80)  | 0  | 0.00<br>(0.00-11.02) | 1  | 10.79<br>(0.27-60.10) | 5   | 3.56#<br>(1.16-8.31) |
| Chronic Liver Disease and                           | 24 | 9.43#                 | 9  | 1.72                 | 4  | 1.48                 | 2  | 3.07                  | 39  | 3.50#                |

|                                                             |    |                         |    |                                 |    |                              |   |                              |    |                                |
|-------------------------------------------------------------|----|-------------------------|----|---------------------------------|----|------------------------------|---|------------------------------|----|--------------------------------|
| Cirrhosis                                                   |    | (6.04-14.03)            |    | (0.79-3.26)                     |    | (0.40-3.78)                  |   | (0.37-11.08)                 |    | (2.49-4.78)                    |
| Nephritis,<br>Nephrotic<br>Syndrome and<br>Nephrosis        | 18 | 3.25#<br>(1.92-5.13)    | 20 | 1.92#<br>(1.17-2.96)            | 8  | 1.39<br>(0.60-2.74)          | 0 | 0.00<br>(0.00-2.29)          | 46 | 1.97#<br>(1.44-2.63)           |
| Complications of<br>Pregnancy,<br>Childbirth,<br>Puerperium | 0  | 0.00<br>(0.00-3,758.22) | 0  | 0.00<br>(0.00-2,215.97<br>)     | 0  | 0.00<br>(0.00-10,917.<br>95) | 0 | 0.00<br>(0.00-264,116<br>.3) | 0  | 0.00<br>(0.00-1,230.<br>42)    |
| Congenital<br>Anomalies                                     | 0  | 0.00<br>(0.00-18.06)    | 0  | 0.00<br>(0.00-9.27)             | 0  | 0.00<br>(0.00-18.12)         | 0 | 0.00<br>(0.00-70.41)         | 0  | 0.00<br>(0.00-4.30)            |
| Certain Conditions<br>Originating in<br>Perinatal Period    | 0  | 0.00<br>(0.00-4,064.60) | 1  | 563.99#<br>(14.28-3,142.3<br>4) | 0  | 0.00<br>(0.00-4,202.3<br>8)  | 0 | 0.00<br>(0.00-14,686.<br>09) | 1  | 262.49#<br>(6.65-1,462.<br>51) |
| Symptoms, Signs<br>and Ill-Defined<br>Conditions            | 14 | 4.75#<br>(2.60-7.96)    | 13 | 2.38#<br>(1.27-4.08)            | 2  | 0.65<br>(0.08-2.36)          | 2 | 2.51<br>(0.30-9.07)          | 31 | 2.53#<br>(1.72-3.59)           |
| Accidents and<br>Adverse Effects                            | 8  | 1.07<br>(0.46-2.11)     | 17 | 1.16<br>(0.67-1.85)             | 18 | 2.20#<br>(1.30-3.47)         | 1 | 0.43<br>(0.01-2.38)          | 44 | 1.35<br>(0.98-1.81)            |
| Suicide and<br>Self-Inflicted<br>Injury                     | 12 | 6.40#<br>(3.31-11.19)   | 9  | 2.32#<br>(1.06-4.41)            | 5  | 2.48<br>(0.81-5.79)          | 1 | 2.06<br>(0.05-11.49)         | 27 | 3.27#<br>(2.16-4.76)           |
| Homicide and<br>Legal Intervention                          | 0  | 0.00                    | 1  | 2.17                            | 0  | 0.00                         | 0 | 0.00                         | 1  | 1.03                           |



|                      |     |                      |     |                      |    |                      |    |                     |     |                      |
|----------------------|-----|----------------------|-----|----------------------|----|----------------------|----|---------------------|-----|----------------------|
|                      |     | (0.00-14.67)         |     | (0.05-12.08)         |    | (0.00-17.58)         |    | (0.00-78.74)        |     | (0.03-5.75)          |
| Other Cause of Death | 129 | 3.22#<br>(2.69-3.82) | 120 | 1.53#<br>(1.27-1.83) | 66 | 1.42#<br>(1.10-1.80) | 17 | 1.22<br>(0.71-1.96) | 332 | 1.86#<br>(1.66-2.07) |

1 number of cancer patients who died due to each cause of death.

2 95% Confidence interval.

# P value less than .05.

**Supplementary table 11: Standardized mortality ratio (SMR) for each cause of death following regional esophageal cancer diagnosis.**

| Cause of Death                       | Less than a year      |                                 | 1-5 years             |                                  | 5-10 years            |                            | More than 10 years    |                            | Total                 |                                  |
|--------------------------------------|-----------------------|---------------------------------|-----------------------|----------------------------------|-----------------------|----------------------------|-----------------------|----------------------------|-----------------------|----------------------------------|
|                                      | Observed <sup>1</sup> | SMR (95% CI <sup>2</sup> )      | Observed <sup>1</sup> | SMR (95% CI <sup>2</sup> )       | Observed <sup>1</sup> | SMR (95% CI <sup>2</sup> ) | Observed <sup>1</sup> | SMR (95% CI <sup>2</sup> ) | Observed <sup>1</sup> | SMR (95% CI <sup>2</sup> )       |
| All Causes of Death                  | 5,898                 | 17.89#<br>(17.44-18.35)         | 5,308                 | 12.63#<br>(12.29-12.98)          | 588                   | 3.41#<br>(3.14-3.70)       | 95                    | 2.77#<br>(2.24-3.38)       | 11,889                | 12.43#<br>(12.20-12.65)          |
| All Malignant Cancer Causes of Death | 5,196                 | 62.01#<br>(60.33-63.72)         | 4,691                 | 43.06#<br>(41.83-44.31)          | 367                   | 8.72#<br>(7.85-9.66)       | 48                    | 5.86#<br>(4.32-7.77)       | 10,302                | 42.39#<br>(41.58-43.22)          |
| Esophageal Cancer Deaths             | 4,820                 | 1,755.52#<br>(1,706.3-1,805.79) | 4,212                 | 1,149.15#<br>(1,114.71-1,184.39) | 262                   | 191.61#<br>(169.11-216.28) | 30                    | 111.27#<br>(75.07-158.84)  | 9,324                 | 1,158.56#<br>(1,135.16-1,182.32) |

|                                              |     |                        |     |                       |    |                         |    |                         |     |                       |
|----------------------------------------------|-----|------------------------|-----|-----------------------|----|-------------------------|----|-------------------------|-----|-----------------------|
| Non-cancer Causes of Death                   |     |                        |     |                       |    |                         |    |                         |     |                       |
| In situ, benign or unknown behavior neoplasm | 12  | 5.51#<br>(2.85-9.63)   | 17  | 6.06#<br>(3.53-9.71)  | 1  | 0.84<br>(0.02-4.69)     | 0  | 0.00<br>(0.00-15.21)    | 30  | 4.68#<br>(3.16-6.68)  |
| Tuberculosis                                 | 0   | 0.00<br>(0.00-45.35)   | 0   | 0.00<br>(0.00-38.07)  | 0  | 0.00<br>(0.00-99.19)    | 0  | 0.00<br>(0.00-569.13)   | 0   | 0.00<br>(0.00-16.62)  |
| Syphilis                                     | 0   | 0.00<br>(0.00-680.59)  | 0   | 0.00<br>(0.00-536.86) | 0  | 0.00<br>(0.00-1,287.75) | 0  | 0.00<br>(0.00-8,066.15) | 0   | 0.00<br>(0.00-236.27) |
| Septicemia                                   | 48  | 10.00#<br>(7.37-13.25) | 26  | 4.22#<br>(2.76-6.19)  | 8  | 3.15#<br>(1.36-6.20)    | 1  | 1.97<br>(0.05-10.95)    | 83  | 5.92#<br>(4.72-7.34)  |
| Other Infectious Diseases                    | 21  | 6.85#<br>(4.24-10.47)  | 13  | 3.33#<br>(1.77-5.70)  | 3  | 2.12<br>(0.44-6.19)     | 1  | 3.86<br>(0.10-21.53)    | 38  | 4.40#<br>(3.11-6.03)  |
| Diabetes Mellitus                            | 9   | 0.86<br>(0.39-1.63)    | 10  | 0.74<br>(0.35-1.36)   | 5  | 0.93<br>(0.30-2.17)     | 1  | 0.94<br>(0.02-5.25)     | 25  | 0.82<br>(0.53-1.21)   |
| Alzheimer's                                  | 3   | 0.30#<br>(0.06-0.89)   | 8   | 0.65<br>(0.28-1.28)   | 7  | 1.15<br>(0.46-2.38)     | 0  | 0.00<br>(0.00-2.83)     | 18  | 0.61#<br>(0.36-0.96)  |
| Diseases of Heart                            | 199 | 2.30#<br>(1.99-2.64)   | 205 | 1.91#<br>(1.65-2.18)  | 75 | 1.70#<br>(1.34-2.13)    | 18 | 2.05#<br>(1.22-3.24)    | 497 | 2.01#<br>(1.84-2.20)  |
| Hypertension without Heart                   | 6   | 1.73<br>(0.64-3.78)    | 9   | 2.04<br>(0.93-3.87)   | 2  | 1.02<br>(0.12-3.69)     | 1  | 2.57<br>(0.07-14.31)    | 18  | 1.76#<br>(1.04-2.78)  |

|                                                     |    |                      |    |                      |    |                       |   |                      |     |                      |
|-----------------------------------------------------|----|----------------------|----|----------------------|----|-----------------------|---|----------------------|-----|----------------------|
| Disease                                             |    |                      |    |                      |    |                       |   |                      |     |                      |
| Cerebrovascular Diseases                            | 26 | 1.52<br>(0.99-2.23)  | 20 | 0.96<br>(0.58-1.48)  | 9  | 1.02<br>(0.47-1.94)   | 1 | 0.57<br>(0.01-3.19)  | 56  | 1.15<br>(0.87-1.50)  |
| Atherosclerosis                                     | 0  | 0.00<br>(0.00-3.98)  | 3  | 2.88<br>(0.59-8.41)  | 1  | 2.46<br>(0.06-13.68)  | 0 | 0.00<br>(0.00-50.83) | 4   | 1.63<br>(0.44-4.18)  |
| Aortic Aneurysm and Dissection                      | 5  | 2.95<br>(0.96-6.89)  | 3  | 1.47<br>(0.30-4.30)  | 1  | 1.34<br>(0.03-7.48)   | 0 | 0.00<br>(0.00-25.98) | 9   | 1.95<br>(0.89-3.70)  |
| Other Diseases of Arteries, Arterioles, Capillaries | 4  | 3.22<br>(0.88-8.25)  | 2  | 1.29<br>(0.16-4.65)  | 2  | 3.12<br>(0.38-11.27)  | 0 | 0.00<br>(0.00-29.24) | 8   | 2.25<br>(0.97-4.42)  |
| Pneumonia and Influenza                             | 34 | 4.66#<br>(3.23-6.51) | 22 | 2.48#<br>(1.56-3.76) | 8  | 2.12<br>(0.91-4.17)   | 3 | 4.03<br>(0.83-11.76) | 67  | 3.24#<br>(2.51-4.12) |
| Chronic Obstructive Pulmonary Disease               | 58 | 2.76#<br>(2.09-3.56) | 68 | 2.49#<br>(1.93-3.15) | 21 | 1.85#<br>(1.15-2.83)  | 6 | 2.59<br>(0.95-5.64)  | 153 | 2.47#<br>(2.09-2.89) |
| Stomach and Duodenal Ulcers                         | 0  | 0.00<br>(0.00-8.67)  | 0  | 0.00<br>(0.00-7.02)  | 2  | 9.59#<br>(1.16-34.63) | 0 | 0.00<br>(0.00-89.56) | 2   | 1.67<br>(0.20-6.01)  |
| Chronic Liver Disease and Cirrhosis                 | 19 | 4.63#<br>(2.79-7.23) | 14 | 2.52#<br>(1.38-4.22) | 5  | 2.53<br>(0.82-5.90)   | 0 | 0.00<br>(0.00-9.56)  | 38  | 3.16#<br>(2.24-4.34) |

|                                                    |    |                         |    |                         |   |                         |   |                          |    |                       |
|----------------------------------------------------|----|-------------------------|----|-------------------------|---|-------------------------|---|--------------------------|----|-----------------------|
| Nephritis, Nephrotic Syndrome and Nephrosis        | 15 | 2.26#<br>(1.26-3.73)    | 7  | 0.84<br>(0.34-1.73)     | 2 | 0.57<br>(0.07-2.05)     | 1 | 1.44<br>(0.04-8.02)      | 25 | 1.30<br>(0.84-1.92)   |
| Complications of Pregnancy, Childbirth, Puerperium | 0  | 0.00<br>(0.00-1,745.65) | 0  | 0.00<br>(0.00-1,344.21) | 0 | 0.00<br>(0.00-5,128.27) | 0 | 0.00<br>(0.00-40,947.04) | 0  | 0.00<br>(0.00-650.96) |
| Congenital Anomalies                               | 0  | 0.00<br>(0.00-12.19)    | 0  | 0.00<br>(0.00-9.29)     | 0 | 0.00<br>(0.00-25.83)    | 0 | 0.00<br>(0.00-134.89)    | 0  | 0.00<br>(0.00-4.24)   |
| Certain Conditions Originating in Perinatal Period | 0  | 0.00<br>(0.00-2,583.77) | 0  | 0.00<br>(0.00-1,934.81) | 0 | 0.00<br>(0.00-5,713.75) | 0 | 0.00<br>(0.00-32,548.60) | 0  | 0.00<br>(0.00-901.21) |
| Symptoms, Signs and Ill-Defined Conditions         | 17 | 5.18#<br>(3.01-8.29)    | 16 | 3.89#<br>(2.23-6.32)    | 3 | 1.74<br>(0.36-5.10)     | 1 | 3.28<br>(0.08-18.26)     | 37 | 3.93#<br>(2.77-5.41)  |
| Accidents and Adverse Effects                      | 17 | 1.67<br>(0.97-2.67)     | 20 | 1.51<br>(0.92-2.33)     | 7 | 1.33<br>(0.54-2.74)     | 3 | 2.80<br>(0.58-8.17)      | 47 | 1.58#<br>(1.16-2.10)  |
| Suicide and Self-Inflicted Injury                  | 28 | 9.46#<br>(6.28-13.67)   | 11 | 2.76#<br>(1.38-4.94)    | 2 | 1.41<br>(0.17-5.11)     | 0 | 0.00<br>(0.00-13.29)     | 41 | 4.75#<br>(3.41-6.44)  |
| Homicide and Legal Intervention                    | 0  | 0.00<br>(0.00-8.28)     | 3  | 5.47#<br>(1.13-15.99)   | 0 | 0.00<br>(0.00-21.79)    | 0 | 0.00<br>(0.00-125.3)     | 3  | 2.51<br>(0.52-7.35)   |

|                      |     |                      |     |                      |    |                      |    |                     |     |                     |
|----------------------|-----|----------------------|-----|----------------------|----|----------------------|----|---------------------|-----|---------------------|
| Other Cause of Death | 181 | 3.79#<br>(3.26-4.38) | 140 | 2.26#<br>(1.90-2.67) | 57 | 2.07#<br>(1.57-2.68) | 10 | 1.77<br>(0.85-3.26) | 388 | 2.72<br>(2.45-3.00) |
|----------------------|-----|----------------------|-----|----------------------|----|----------------------|----|---------------------|-----|---------------------|

1 number of cancer patients who died due to each cause of death.

2 95% Confidence interval.

# P value less than .05.

**Supplementary table 12: Standardized-mortality ratio (SMR) for each cause of death following distant esophageal cancer diagnosis.**

| Cause of Death                       | Less than a year      |                                  | 1-5 years             |                                  | 5-10 years            |                            | More than 10 years    |                            | Total                 |                                  |
|--------------------------------------|-----------------------|----------------------------------|-----------------------|----------------------------------|-----------------------|----------------------------|-----------------------|----------------------------|-----------------------|----------------------------------|
|                                      | Observed <sup>1</sup> | SMR (95% CI <sup>2</sup> )       | Observed <sup>1</sup> | SMR (95% CI <sup>2</sup> )       | Observed <sup>1</sup> | SMR (95% CI <sup>2</sup> ) | Observed <sup>1</sup> | SMR (95% CI <sup>2</sup> ) | Observed <sup>1</sup> | SMR (95% CI <sup>2</sup> )       |
| All Causes of Death                  | 12,876                | 54.49#<br>(53.56-55.44)          | 4,096                 | 30.21#<br>(29.30-31.15)          | 126                   | 3.79#<br>(3.16-4.51)       | 21                    | 3.51#<br>(2.17-5.36)       | 17,119                | 41.64#<br>(41.02-42.27)          |
| All Malignant Cancer Causes of Death | 12,197                | 197.62#<br>(194.13-201.16)       | 3,844                 | 109.09#<br>(105.67-112.60)       | 75                    | 9.22#<br>(7.25-11.56)      | 7                     | 4.86#<br>(1.95-10.01)      | 16,123                | 151.35#<br>(149.02-153.70)       |
| Esophageal Cancer Deaths             | 10,867                | 5,149.37#<br>(5,053.00-5,247.11) | 3,431                 | 2,888.65#<br>(2,792.79-2,986.96) | 56                    | 210.38#<br>(158.92-273.19) | 5                     | 106.98#<br>(34.74-249.65)  | 14,359                | 3,976.42#<br>(3,911.64-4,042.00) |

|                                              |     |                        |    |                         |    |                         |   |                          |     |                        |
|----------------------------------------------|-----|------------------------|----|-------------------------|----|-------------------------|---|--------------------------|-----|------------------------|
| Non-cancer Causes of Death                   |     |                        |    |                         |    |                         |   |                          |     |                        |
| In situ, benign or unknown behavior neoplasm | 22  | 14.36#<br>(9.00-21.74) | 8  | 9.08#<br>(3.92-17.89)   | 0  | 0.00<br>(0.00-17.12)    | 1 | 26.19<br>(0.66-145.95)   | 31  | 11.63#<br>(7.90-16.51) |
| Tuberculosis                                 | 0   | 0.00<br>(0.00-58.80)   | 0  | 0.00<br>(0.00-107.03)   | 0  | 0.00<br>(0.00-486.19)   | 0 | 0.00<br>(0.00-3,608.98)  | 0   | 0.00<br>(0.00-34.86)   |
| Syphilis                                     | 0   | 0.00<br>(0.00-884.56)  | 0  | 0.00<br>(0.00-1,636.26) | 0  | 0.00<br>(0.00-6,363.46) | 0 | 0.00<br>(0.00-35,355.76) | 0   | 0.00<br>(0.00-518.92)  |
| Septicemia                                   | 29  | 8.43#<br>(5.65-12.11)  | 13 | 6.53#<br>(3.48-11.16)   | 2  | 4.04<br>(0.49-14.60)    | 1 | 10.90<br>(0.28-60.73)    | 45  | 7.48#<br>(5.45-10.00)  |
| Other Infectious Diseases                    | 22  | 9.20#<br>(5.77-13.94)  | 5  | 3.76#<br>(1.22-8.78)    | 2  | 6.78<br>(0.82-24.51)    | 0 | 0.00<br>(0.00-74.30)     | 29  | 7.14#<br>(4.78-10.25)  |
| Diabetes Mellitus                            | 18  | 2.33#<br>(1.38-3.69)   | 7  | 1.58<br>(0.63-3.25)     | 0  | 0.00<br>(0.00-3.47)     | 1 | 5.14<br>(0.13-28.64)     | 26  | 1.94#<br>(1.27-2.84)   |
| Alzheimer's                                  | 3   | 0.48<br>(0.10-1.40)    | 4  | 1.03<br>(0.28-2.63)     | 0  | 0.00<br>(0.00-3.01)     | 1 | 4.11<br>(0.10-22.92)     | 8   | 0.69<br>(0.30-1.35)    |
| Diseases of Heart                            | 219 | 3.56#<br>(3.10-4.06)   | 76 | 2.21#<br>(1.74-2.76)    | 21 | 2.51#<br>(1.55-3.84)    | 4 | 2.71<br>(0.74-6.93)      | 320 | 3.02#<br>(2.70-3.37)   |
| Hypertension                                 | 5   | 2.05                   | 2  | 1.38                    | 1  | 2.53                    | 1 | 13.46                    | 9   | 2.07                   |

|                                                     |    |                      |    |                        |   |                      |   |                       |    |                       |
|-----------------------------------------------------|----|----------------------|----|------------------------|---|----------------------|---|-----------------------|----|-----------------------|
| without Heart Disease                               |    | (0.67-4.79)          |    | (0.17-4.97)            |   | (0.06-14.11)         |   | (0.34-75.02)          |    | (0.94-3.92)           |
| Cerebrovascular Diseases                            | 41 | 3.47#<br>(2.49-4.71) | 11 | 1.64<br>(0.82-2.93)    | 3 | 1.73<br>(0.36-5.05)  | 1 | 3.11<br>(0.08-17.34)  | 56 | 2.72#<br>(2.05-3.53)  |
| Atherosclerosis                                     | 3  | 4.81<br>(0.99-14.06) | 2  | 6.18<br>(0.75-22.32)   | 0 | 0.00<br>(0.00-49.07) | 0 | 0.00<br>(0.00-299.63) | 5  | 4.83#<br>(1.57-11.28) |
| Aortic Aneurysm and Dissection                      | 2  | 1.63<br>(0.20-5.90)  | 1  | 1.54<br>(0.04-8.61)    | 1 | 7.18<br>(0.18-39.98) | 0 | 0.00<br>(0.00-155.89) | 4  | 1.97<br>(0.54-5.03)   |
| Other Diseases of Arteries, Arterioles, Capillaries | 2  | 2.29<br>(0.28-8.26)  | 1  | 2.02<br>(0.05-11.26)   | 0 | 0.00<br>(0.00-29.78) | 0 | 0.00<br>(0.00-159.05) | 3  | 1.98<br>(0.41-5.78)   |
| Pneumonia and Influenza                             | 23 | 4.59#<br>(2.91-6.88) | 20 | 7.10#<br>(4.34-10.97)  | 0 | 0.00<br>(0.00-5.32)  | 1 | 8.49<br>(0.22-47.33)  | 44 | 5.09#<br>(3.70-6.84)  |
| Chronic Obstructive Pulmonary Disease               | 47 | 3.18#<br>(2.34-4.23) | 16 | 1.86#<br>(1.06-3.02)   | 8 | 3.77#<br>(1.63-7.43) | 1 | 2.55<br>(0.06-14.22)  | 72 | 2.78#<br>(2.18-3.50)  |
| Stomach and Duodenal Ulcers                         | 0  | 0.00<br>(0.00-12.05) | 3  | 17.52#<br>(3.61-51.20) | 0 | 0.00<br>(0.00-90.84) | 0 | 0.00<br>(0.00-512.55) | 3  | 5.71#<br>(1.18-16.70) |
| Chronic Liver Disease and Cirrhosis                 | 18 | 5.39#<br>(3.19-8.52) | 3  | 1.54<br>(0.32-4.51)    | 1 | 2.29<br>(0.06-12.77) | 0 | 0.00<br>(0.00-48.22)  | 22 | 3.80#<br>(2.38-5.75)  |

|                                                    |    |                             |   |                         |   |                          |   |                              |    |                             |
|----------------------------------------------------|----|-----------------------------|---|-------------------------|---|--------------------------|---|------------------------------|----|-----------------------------|
| Nephritis, Nephrotic Syndrome and Nephrosis        | 10 | 2.13#<br>(1.02-3.92)        | 2 | 0.75<br>(0.09-2.71)     | 1 | 1.53<br>(0.04-8.54)      | 0 | 0.00<br>(0.00-31.16)         | 13 | 1.60<br>(0.85-2.73)         |
| Complications of Pregnancy, Childbirth, Puerperium | 1  | 611.86#<br>(15.49-3,409.04) | 0 | 0.00<br>(0.00-5,494.30) | 0 | 0.00<br>(0.00-34,887.04) | 0 | 0.00<br>(0.00-10,798,664.78) | 1  | 414.62#<br>(10.50-2,310.11) |
| Congenital Anomalies                               | 1  | 4.17<br>(0.11-23.23)        | 1 | 7.26<br>(0.18-40.46)    | 0 | 0.00<br>(0.00-118.49)    | 0 | 0.00<br>(0.00-679.91)        | 2  | 4.83<br>(0.58-17.45)        |
| Certain Conditions Originating in Perinatal Period | 0  | 0.00<br>(0.00-3,069.41)     | 0 | 0.00<br>(0.00-5,520.07) | 0 | 0.00<br>(0.00-24,983.23) | 0 | 0.00<br>(0.00-174,224.74)    | 0  | 0.00<br>(0.00-1,809.24)     |
| Symptoms, Signs and Ill-Defined Conditions         | 26 | 11.22#<br>(7.33-16.44)      | 7 | 5.29#<br>(2.13-10.89)   | 0 | 0.00<br>(0.00-11.09)     | 1 | 18.05<br>(0.46-100.58)       | 34 | 8.44#<br>(5.84-11.79)       |
| Accidents and Adverse Effects                      | 19 | 2.43#<br>(1.47-3.80)        | 8 | 1.78<br>(0.77-3.50)     | 2 | 1.87<br>(0.23-6.76)      | 0 | 0.00<br>(0.00-19.40)         | 29 | 2.14#<br>(1.43-3.07)        |
| Suicide and Self-Inflicted Injury                  | 19 | 7.69#<br>(4.63-12.01)       | 5 | 3.57#<br>(1.16-8.32)    | 1 | 3.33<br>(0.08-18.55)     | 0 | 0.00<br>(0.00-72.47)         | 25 | 5.92#<br>(3.83-8.74)        |
| Homicide and Legal Intervention                    | 0  | 0.00<br>(0.00-9.38)         | 2 | 9.94#<br>(1.20-35.92)   | 0 | 0.00<br>(0.00-95.80)     | 0 | 0.00<br>(0.00-564.51)        | 2  | 3.13<br>(0.38-11.30)        |



|                      |     |                      |    |                      |   |                     |   |                     |     |                      |
|----------------------|-----|----------------------|----|----------------------|---|---------------------|---|---------------------|-----|----------------------|
| Other Cause of Death | 149 | 4.48#<br>(3.79-5.26) | 55 | 2.77#<br>(2.08-3.60) | 8 | 1.51<br>(0.65-2.98) | 1 | 1.03<br>(0.03-5.73) | 213 | 3.59#<br>(3.12-4.10) |
|----------------------|-----|----------------------|----|----------------------|---|---------------------|---|---------------------|-----|----------------------|

1 number of cancer patients who died due to each cause of death.

2 95% Confidence interval.

# P value less than .05.

**Supplementary table 13: Standardized mortality ratio (SMR) for each cause of death following esophageal cancer diagnosis in Grade I.**

| Cause of Death                       | Less than a year      |                                  | 1-5 years             |                            | 5-10 years            |                            | More than 10 years    |                            | Total                 |                            |
|--------------------------------------|-----------------------|----------------------------------|-----------------------|----------------------------|-----------------------|----------------------------|-----------------------|----------------------------|-----------------------|----------------------------|
|                                      | Observed <sup>1</sup> | SMR (95% CI <sup>2</sup> )       | Observed <sup>1</sup> | SMR (95% CI <sup>2</sup> ) | Observed <sup>1</sup> | SMR (95% CI <sup>2</sup> ) | Observed <sup>1</sup> | SMR (95% CI <sup>2</sup> ) | Observed <sup>1</sup> | SMR (95% CI <sup>2</sup> ) |
| All Causes of Death                  | 1,035                 | 16.38#<br>(15.40-17.41)          | 765                   | 6.34#<br>(5.90-6.81)       | 177                   | 2.50#<br>(2.15-2.90)       | 64                    | 1.82#<br>(1.40-2.32)       | 2,041                 | 7.05#<br>(6.74-7.36)       |
| All Malignant Cancer Causes of Death | 885                   | 56.89#<br>(53.20-60.76)          | 616                   | 20.67#<br>(19.07-22.37)    | 93                    | 5.64#<br>(4.56-6.91)       | 32                    | 4.37#<br>(2.99-6.17)       | 1,626                 | 23.51#<br>(22.38-24.68)    |
| Esophageal Cancer Deaths             | 800                   | 1,663.19#<br>(1,549.92-1,782.55) | 548                   | 573.50#<br>(526.48-623.59) | 62                    | 119.12#<br>(91.33-152.71)  | 19                    | 88.03#<br>(53.00-137.46)   | 1,429                 | 657.65#<br>(623.99-692.66) |

|                                              |    |                         |    |                         |    |                         |    |                         |     |                       |
|----------------------------------------------|----|-------------------------|----|-------------------------|----|-------------------------|----|-------------------------|-----|-----------------------|
| Non-cancer Causes of Death                   |    |                         |    |                         |    |                         |    |                         |     |                       |
| In situ, benign or unknown behavior neoplasm | 4  | 9.67#<br>(2.63-24.75)   | 2  | 2.46<br>(0.30-8.89)     | 0  | 0.00<br>(0.00-7.49)     | 0  | 0.00<br>(0.00-15.07)    | 6   | 3.06#<br>(1.12-6.65)  |
| Tuberculosis                                 | 0  | 0.00<br>(0.00-229.65)   | 0  | 0.00<br>(0.00-135.85)   | 0  | 0.00<br>(0.00-251.55)   | 0  | 0.00<br>(0.00-661.15)   | 0   | 0.00<br>(0.00-58.13)  |
| Syphilis                                     | 0  | 0.00<br>(0.00-3,866.92) | 0  | 0.00<br>(0.00-2,130.41) | 0  | 0.00<br>(0.00-3,461.70) | 0  | 0.00<br>(0.00-7,231.86) | 0   | 0.00<br>(0.00-865.69) |
| Septicemia                                   | 7  | 7.81#<br>(3.14-16.10)   | 6  | 3.49#<br>(1.28-7.60)    | 5  | 4.89#<br>(1.59-11.42)   | 1  | 1.98<br>(0.05-11.03)    | 19  | 4.59#<br>(2.76-7.16)  |
| Other Infectious Diseases                    | 7  | 13.43#<br>(5.40-27.68)  | 6  | 6.05#<br>(2.22-13.17)   | 1  | 1.81<br>(0.05-10.07)    | 1  | 4.04<br>(0.10-22.51)    | 15  | 6.48#<br>(3.63-10.69) |
| Diabetes Mellitus                            | 3  | 1.55<br>(0.32-4.54)     | 2  | 0.55<br>(0.07-1.97)     | 1  | 0.48<br>(0.01-2.65)     | 1  | 1.04<br>(0.03-5.79)     | 7   | 0.81<br>(0.32-1.67)   |
| Alzheimer's                                  | 3  | 1.59<br>(0.33-4.65)     | 2  | 0.53<br>(0.06-1.92)     | 6  | 2.30<br>(0.84-5.01)     | 2  | 1.18<br>(0.14-4.27)     | 13  | 1.31<br>(0.70-2.23)   |
| Diseases of Heart                            | 40 | 2.28#<br>(1.63-3.10)    | 51 | 1.56#<br>(1.16-2.05)    | 29 | 1.54#<br>(1.03-2.21)    | 11 | 1.17<br>(0.58-2.09)     | 131 | 1.67#<br>(1.40-1.98)  |

|                                                     |    |                      |    |                      |   |                       |   |                      |    |                      |
|-----------------------------------------------------|----|----------------------|----|----------------------|---|-----------------------|---|----------------------|----|----------------------|
| Hypertension without Heart Disease                  | 2  | 3.19<br>(0.39-11.53) | 0  | 0.00<br>(0.00-3.04)  | 1 | 1.26<br>(0.03-7.00)   | 0 | 0.00<br>(0.00-8.48)  | 3  | 0.98<br>(0.20-2.85)  |
| Cerebrovascular Diseases                            | 9  | 2.52#<br>(1.15-4.78) | 10 | 1.54<br>(0.74-2.83)  | 5 | 1.32<br>(0.43-3.09)   | 4 | 2.05<br>(0.56-5.24)  | 28 | 1.77#<br>(1.18-2.56) |
| Atherosclerosis                                     | 0  | 0.00<br>(0.00-15.62) | 0  | 0.00<br>(0.00-9.34)  | 0 | 0.00<br>(0.00-17.86)  | 0 | 0.00<br>(0.00-38.1)  | 0  | 0.00<br>(0.00-3.95)  |
| Aortic Aneurysm and Dissection                      | 0  | 0.00<br>(0.00-10.04) | 1  | 1.54<br>(0.04-8.57)  | 0 | 0.00<br>(0.00-11.13)  | 1 | 7.13<br>(0.18-39.71) | 2  | 1.34<br>(0.16-4.85)  |
| Other Diseases of Arteries, Arterioles, Capillaries | 0  | 0.00<br>(0.00-14.79) | 0  | 0.00<br>(0.00-7.96)  | 0 | 0.00<br>(0.00-13.67)  | 1 | 7.44<br>(0.19-41.43) | 1  | 0.90<br>(0.02-4.99)  |
| Pneumonia and Influenza                             | 2  | 1.29<br>(0.16-4.68)  | 5  | 1.76<br>(0.57-4.10)  | 6 | 3.54#<br>(1.30-7.71)  | 0 | 0.00<br>(0.00-4.35)  | 13 | 1.88<br>(1.00-3.21)  |
| Chronic Obstructive Pulmonary Disease               | 14 | 3.51#<br>(1.92-5.89) | 14 | 1.79<br>(0.98-3.01)  | 8 | 1.74<br>(0.75-3.44)   | 2 | 0.90<br>(0.11-3.23)  | 38 | 2.04#<br>(1.44-2.80) |
| Stomach and Duodenal Ulcers                         | 0  | 0.00<br>(0.00-41.17) | 0  | 0.00<br>(0.00-22.92) | 1 | 11.46<br>(0.29-63.86) | 0 | 0.00<br>(0.00-90.66) | 1  | 2.64<br>(0.07-14.72) |
| Chronic Liver                                       | 1  | 1.47                 | 2  | 1.50                 | 2 | 2.96                  | 1 | 3.54                 | 6  | 2.02                 |

|                                                    |   |                          |   |                         |   |                          |   |                           |    |                         |
|----------------------------------------------------|---|--------------------------|---|-------------------------|---|--------------------------|---|---------------------------|----|-------------------------|
| Disease and Cirrhosis                              |   | (0.04-8.17)              |   | (0.18-5.42)             |   | (0.36-10.69)             |   | (0.09-19.73)              |    | (0.74-4.39)             |
| Nephritis, Nephrotic Syndrome and Nephrosis        | 5 | 3.99#<br>(1.30-9.32)     | 2 | 0.83<br>(0.10-3.00)     | 1 | 0.67<br>(0.02-3.74)      | 0 | 0.00<br>(0.00-5.00)       | 8  | 1.36<br>(0.59-2.68)     |
| Complications of Pregnancy, Childbirth, Puerperium | 0 | 0.00<br>(0.00-10,196.17) | 0 | 0.00<br>(0.00-5,814.34) | 0 | 0.00<br>(0.00-19,826.21) | 0 | 0.00<br>(0.00-115,008.42) | 0  | 0.00<br>(0.00-3,037.69) |
| Congenital Anomalies                               | 0 | 0.00<br>(0.00-67.43)     | 0 | 0.00<br>(0.00-35.95)    | 0 | 0.00<br>(0.00-70.82)     | 0 | 0.00<br>(0.00-159.17)     | 0  | 0.00<br>(0.00-15.86)    |
| Certain Conditions Originating in Perinatal Period | 0 | 0.00<br>(0.00-15,441.74) | 0 | 0.00<br>(0.00-7,983.93) | 0 | 0.00<br>(0.00-16,011.85) | 0 | 0.00<br>(0.00-36,458.97)  | 0  | 0.00<br>(0.00-3,572.79) |
| Symptoms, Signs and Ill-Defined Conditions         | 4 | 6.28#<br>(1.71-16.07)    | 2 | 1.66<br>(0.20-5.99)     | 1 | 1.30<br>(0.03-7.24)      | 0 | 0.00<br>(0.00-9.25)       | 7  | 2.32<br>(0.93-4.79)     |
| Accidents and Adverse Effects                      | 4 | 2.23<br>(0.61-5.72)      | 8 | 2.27<br>(0.98-4.48)     | 0 | 0.00<br>(0.00-1.82)      | 2 | 1.94<br>(0.24-7.02)       | 14 | 1.67<br>(0.91-2.81)     |
| Suicide and Self-Inflicted Injury                  | 1 | 2.00<br>(0.05-11.12)     | 1 | 1.01<br>(0.03-5.64)     | 0 | 0.00<br>(0.00-7.28)      | 0 | 0.00<br>(0.00-17.48)      | 2  | 0.91<br>(0.11-3.27)     |

|                                 |    |                      |    |                      |    |                      |   |                       |     |                      |
|---------------------------------|----|----------------------|----|----------------------|----|----------------------|---|-----------------------|-----|----------------------|
| Homicide and Legal Intervention | 0  | 0.00<br>(0.00-49.08) | 1  | 7.70<br>(0.19-42.89) | 0  | 0.00<br>(0.00-64.02) | 0 | 0.00<br>(0.00-161.97) | 1   | 3.50<br>(0.09-19.52) |
| Other Cause of Death            | 44 | 5.03#<br>(3.65-6.75) | 34 | 1.95#<br>(1.35-2.72) | 17 | 1.52<br>(0.88-2.43)  | 5 | 0.81<br>(0.26-1.88)   | 100 | 2.29#<br>(1.87-2.79) |

1 number of cancer patients who died due to each cause of death.

2 95% Confidence interval.

# P value less than .05.

**Supplementary table 14: Standardized mortality ratio (SMR) for each cause of death following esophageal cancer diagnosis in Grade II.**

| Cause of Death                       | Less than a year      |                            | 1-5 years             |                            | 5-10 years            |                            | More than 10 years    |                            | Total                 |                            |
|--------------------------------------|-----------------------|----------------------------|-----------------------|----------------------------|-----------------------|----------------------------|-----------------------|----------------------------|-----------------------|----------------------------|
|                                      | Observed <sup>1</sup> | SMR (95% CI <sup>2</sup> ) | Observed <sup>1</sup> | SMR (95% CI <sup>2</sup> ) | Observed <sup>1</sup> | SMR (95% CI <sup>2</sup> ) | Observed <sup>1</sup> | SMR (95% CI <sup>2</sup> ) | Observed <sup>1</sup> | SMR (95% CI <sup>2</sup> ) |
| All Causes of Death                  | 9,053                 | 22.73#<br>(22.26-23.20)    | 5,889                 | 10.76#<br>(10.49-11.04)    | 783                   | 2.88#<br>(2.68-3.09)       | 262                   | 2.04#<br>(1.80-2.31)       | 15,987                | 11.88#<br>(11.70-12.07)    |
| All Malignant Cancer Causes of Death | 8,091                 | 82.52#<br>(80.73-84.34)    | 5,123                 | 37.57#<br>(36.55-38.61)    | 462                   | 7.10#<br>(6.47-7.78)       | 117                   | 4.09#<br>(3.38-4.90)       | 13,793                | 42.04#<br>(41.34-42.75)    |

|                                                    |       |                                  |       |                                  |     |                            |    |                         |        |                                  |
|----------------------------------------------------|-------|----------------------------------|-------|----------------------------------|-----|----------------------------|----|-------------------------|--------|----------------------------------|
| Esophageal<br>Cancer Deaths                        | 7,430 | 2,462.81#<br>(2,407.12-2,519.45) | 4,579 | 1,067.45#<br>(1,036.75-1,098.82) | 324 | 159.36#<br>(142.48-177.69) | 61 | 71.22#<br>(54.48-91.48) | 12,394 | 1,215.55#<br>(1,194.24-1,237.14) |
| Non-cancer<br>Causes of Death                      |       |                                  |       |                                  |     |                            |    |                         |        |                                  |
| In situ, benign or<br>unknown behavior<br>neoplasm | 14    | 5.47#<br>(2.99-9.18)             | 18    | 4.99#<br>(2.96-7.89)             | 8   | 4.27#<br>(1.84-8.42)       | 0  | 0.00<br>(0.00-4.11)     | 40     | 4.48#<br>(3.20-6.10)             |
| Tuberculosis                                       | 0     | 0.00<br>(0.00-33.36)             | 0     | 0.00<br>(0.00-26.96)             | 1   | 16.55<br>(0.42-92.22)      | 0  | 0.00<br>(0.00-137.09)   | 1      | 2.99<br>(0.08-16.64)             |
| Syphilis                                           | 0     | 0.00<br>(0.00-546.62)            | 0     | 0.00<br>(0.00-419.01)            | 0   | 0.00<br>(0.00-862.14)      | 0  | 0.00<br>(0.00-1,891.59) | 0      | 0.00<br>(0.00-169.36)            |
| Septicemia                                         | 41    | 7.14#<br>(5.12-9.69)             | 32    | 4.04#<br>(2.76-5.70)             | 13  | 3.27#<br>(1.74-5.60)       | 4  | 2.12<br>(0.58-5.42)     | 90     | 4.61#<br>(3.71-5.67)             |
| Other Infectious<br>Diseases                       | 29    | 8.33#<br>(5.58-11.97)            | 10    | 2.13#<br>(1.02-3.92)             | 7   | 3.21#<br>(1.29-6.62)       | 0  | 0.00<br>(0.00-3.96)     | 46     | 4.08#<br>(2.98-5.44)             |
| Diabetes Mellitus                                  | 21    | 1.69#<br>(1.04-2.58)             | 21    | 1.23<br>(0.76-1.88)              | 8   | 0.97<br>(0.42-1.91)        | 1  | 0.26<br>(0.01-1.46)     | 51     | 1.23<br>(0.91-1.61)              |
| Alzheimer's                                        | 5     | 0.42#<br>(0.14-0.98)             | 7     | 0.41#<br>(0.16-0.84)             | 14  | 1.42<br>(0.77-2.37)        | 5  | 0.89<br>(0.29-2.08)     | 31     | 0.70#<br>(0.47-0.99)             |

|                                                     |     |                      |     |                      |     |                      |    |                      |     |                      |
|-----------------------------------------------------|-----|----------------------|-----|----------------------|-----|----------------------|----|----------------------|-----|----------------------|
| Diseases of Heart                                   | 334 | 3.03#<br>(2.71-3.37) | 278 | 1.89#<br>(1.68-2.13) | 105 | 1.47#<br>(1.21-1.78) | 48 | 1.44#<br>(1.06-1.91) | 765 | 2.11#<br>(1.97-2.27) |
| Hypertension without Heart Disease                  | 7   | 1.71<br>(0.69-3.52)  | 11  | 1.92<br>(0.96-3.43)  | 3   | 0.98<br>(0.20-2.86)  | 2  | 1.27<br>(0.15-4.58)  | 23  | 1.59#<br>(1.01-2.38) |
| Cerebrovascular Diseases                            | 52  | 2.29#<br>(1.71-3.00) | 26  | 0.87<br>(0.57-1.28)  | 15  | 1.04<br>(0.58-1.71)  | 7  | 0.99<br>(0.40-2.04)  | 100 | 1.35#<br>(1.10-1.64) |
| Atherosclerosis                                     | 7   | 4.79#<br>(1.92-9.86) | 6   | 3.42#<br>(1.26-7.45) | 0   | 0.00<br>(0.00-4.91)  | 1  | 3.13<br>(0.08-17.45) | 14  | 3.27#<br>(1.79-5.48) |
| Aortic Aneurysm and Dissection                      | 5   | 2.19<br>(0.71-5.12)  | 9   | 3.07#<br>(1.40-5.83) | 2   | 1.57<br>(0.19-5.68)  | 1  | 1.90<br>(0.05-10.59) | 17  | 2.43#<br>(1.41-3.88) |
| Other Diseases of Arteries, Arterioles, Capillaries | 6   | 3.80#<br>(1.40-8.28) | 4   | 1.89<br>(0.51-4.83)  | 2   | 1.93<br>(0.23-6.97)  | 0  | 0.00<br>(0.00-7.59)  | 12  | 2.30#<br>(1.19-4.02) |
| Pneumonia and Influenza                             | 50  | 5.16#<br>(3.83-6.80) | 30  | 2.37#<br>(1.60-3.38) | 11  | 1.76<br>(0.88-3.15)  | 7  | 2.34<br>(0.94-4.83)  | 98  | 3.10#<br>(2.52-3.78) |
| Chronic Obstructive Pulmonary Disease               | 80  | 3.26#<br>(2.58-4.05) | 91  | 2.61#<br>(2.10-3.20) | 32  | 1.81#<br>(1.24-2.55) | 25 | 3.01#<br>(1.95-4.44) | 228 | 2.67#<br>(2.33-3.04) |
| Stomach and                                         | 1   | 1.77                 | 2   | 2.73                 | 1   | 2.99                 | 0  | 0.00                 | 4   | 2.24                 |

|                                                    |    |                         |    |                         |    |                         |   |                          |    |                       |
|----------------------------------------------------|----|-------------------------|----|-------------------------|----|-------------------------|---|--------------------------|----|-----------------------|
| Duodenal Ulcers                                    |    | (0.04-9.86)             |    | (0.33-9.87)             |    | (0.08-16.68)            |   | (0.00-24.27)             |    | (0.61-5.74)           |
| Chronic Liver Disease and Cirrhosis                | 25 | 5.77#<br>(3.73-8.52)    | 11 | 1.79<br>(0.89-3.20)     | 6  | 2.20<br>(0.81-4.78)     | 2 | 1.78<br>(0.22-6.42)      | 44 | 3.07#<br>(2.23-4.12)  |
| Nephritis, Nephrotic Syndrome and Nephrosis        | 15 | 1.87#<br>(1.05-3.08)    | 13 | 1.18<br>(0.63-2.02)     | 3  | 0.53<br>(0.11-1.56)     | 5 | 1.84<br>(0.60-4.30)      | 36 | 1.32<br>(0.92-1.82)   |
| Complications of Pregnancy, Childbirth, Puerperium | 0  | 0.00<br>(0.00-1,842.66) | 0  | 0.00<br>(0.00-1,439.22) | 0  | 0.00<br>(0.00-4,117.80) | 0 | 0.00<br>(0.00-19,650.16) | 0  | 0.00<br>(0.00-653.06) |
| Congenital Anomalies                               | 2  | 5.78<br>(0.70-20.86)    | 0  | 0.00<br>(0.00-7.81)     | 0  | 0.00<br>(0.00-17.77)    | 0 | 0.00<br>(0.00-42.14)     | 2  | 1.80<br>(0.22-6.49)   |
| Certain Conditions Originating in Perinatal Period | 0  | 0.00<br>(0.00-2,422.74) | 0  | 0.00<br>(0.00-1,752.15) | 0  | 0.00<br>(0.00-4,064.75) | 0 | 0.00<br>(0.00-9,582.83)  | 0  | 0.00<br>(0.00-749.71) |
| Symptoms, Signs and Ill-Defined Conditions         | 30 | 7.40#<br>(4.99-10.56)   | 17 | 3.05#<br>(1.78-4.88)    | 3  | 1.04<br>(0.21-3.03)     | 4 | 3.06<br>(0.83-7.83)      | 54 | 3.90#<br>(2.93-5.09)  |
| Accidents and Adverse Effects                      | 27 | 2.39#<br>(1.57-3.47)    | 21 | 1.33<br>(0.82-2.03)     | 18 | 2.31#<br>(1.37-3.65)    | 3 | 0.81<br>(0.17-2.38)      | 69 | 1.79#<br>(1.39-2.26)  |



|                                   |     |                       |     |                      |    |                      |    |                       |     |                      |
|-----------------------------------|-----|-----------------------|-----|----------------------|----|----------------------|----|-----------------------|-----|----------------------|
| Suicide and Self-Inflicted Injury | 22  | 7.12#<br>(4.46-10.77) | 7   | 1.60<br>(0.64-3.30)  | 1  | 0.50<br>(0.01-2.81)  | 4  | 4.92#<br>(1.34-12.59) | 34  | 3.31#<br>(2.29-4.63) |
| Homicide and Legal Intervention   | 0   | 0.00<br>(0.00-7.00)   | 0   | 0.00<br>(0.00-5.81)  | 0  | 0.00<br>(0.00-15.42) | 0  | 0.00<br>(0.00-40.98)  | 0   | 0.00<br>(0.00-2.47)  |
| Other Cause of Death              | 189 | 3.43#<br>(2.96-3.96)  | 152 | 1.93#<br>(1.63-2.26) | 68 | 1.59#<br>(1.23-2.01) | 26 | 1.19<br>(0.78-1.75)   | 435 | 2.19#<br>(1.99-2.41) |

1 number of cancer patients who died due to each cause of death.

2 95% Confidence interval.

# P value less than .05.

**Supplementary table 15: Standardized mortality ratio (SMR) for each cause of death following esophageal cancer diagnosis in Grade III.**

| Cause of Death      | Less than a year      |                            | 1-5 years             |                            | 5-10 years            |                            | More than 10 years    |                            | Total                 |                            |
|---------------------|-----------------------|----------------------------|-----------------------|----------------------------|-----------------------|----------------------------|-----------------------|----------------------------|-----------------------|----------------------------|
|                     | Observed <sup>1</sup> | SMR (95% CI <sup>2</sup> ) | Observed <sup>1</sup> | SMR (95% CI <sup>2</sup> ) | Observed <sup>1</sup> | SMR (95% CI <sup>2</sup> ) | Observed <sup>1</sup> | SMR (95% CI <sup>2</sup> ) | Observed <sup>1</sup> | SMR (95% CI <sup>2</sup> ) |
| All Causes of Death | 14,127                | 31.21#<br>(30.70-31.73)    | 6,620                 | 14.28#<br>(13.93-14.62)    | 655                   | 3.07#<br>(2.84-3.31)       | 214                   | 1.99#<br>(1.73-2.27)       | 21,616                | 17.47#<br>(17.24-17.70)    |

|                                              |        |                                  |       |                                  |     |                            |    |                         |        |                                  |
|----------------------------------------------|--------|----------------------------------|-------|----------------------------------|-----|----------------------------|----|-------------------------|--------|----------------------------------|
| All Malignant Cancer Causes of Death         | 12,967 | 115.29#<br>(113.31-117.29)       | 5,925 | 50.14#<br>(48.88-51.44)          | 352 | 6.86#<br>(6.16-7.62)       | 80 | 3.44#<br>(2.73-4.28)    | 19,324 | 63.31#<br>(62.42-64.21)          |
| Esophageal Cancer Deaths                     | 11,767 | 3,301.49#<br>(3,242.11-3,361.69) | 5,323 | 1,390.61#<br>(1,353.50-1,428.48) | 235 | 145.16#<br>(127.19-164.95) | 39 | 54.52#<br>(38.77-74.53) | 17,364 | 1,785.27#<br>(1,758.82-1,812.03) |
| Non-cancer Causes of Death                   |        |                                  |       |                                  |     |                            |    |                         |        |                                  |
| In situ, benign or unknown behavior neoplasm | 23     | 7.85#<br>(4.97-11.77)            | 13    | 4.25#<br>(2.26-7.26)             | 2   | 1.37<br>(0.17-4.95)        | 0  | 0.00<br>(0.00-4.96)     | 38     | 4.64#<br>(3.28-6.36)             |
| Tuberculosis                                 | 1      | 8.33<br>(0.21-46.44)             | 0     | 0.00<br>(0.00-32.31)             | 0   | 0.00<br>(0.00-78.32)       | 0  | 0.00<br>(0.00-184.55)   | 1      | 3.32<br>(0.08-18.50)             |
| Syphilis                                     | 0      | 0.00<br>(0.00-511.58)            | 0     | 0.00<br>(0.00-506.7)             | 0   | 0.00<br>(0.00-1,113.45)    | 0  | 0.00<br>(0.00-2,595.69) | 0      | 0.00<br>(0.00-191.88)            |
| Septicemia                                   | 47     | 7.30#<br>(5.36-9.70)             | 29    | 4.34#<br>(2.90-6.23)             | 8   | 2.57#<br>(1.11-5.07)       | 4  | 2.59<br>(0.71-6.64)     | 88     | 4.95#<br>(3.97-6.10)             |
| Other Infectious Diseases                    | 22     | 5.73#<br>(3.59-8.68)             | 15    | 3.77#<br>(2.11-6.22)             | 2   | 1.16<br>(0.14-4.19)        | 0  | 0.00<br>(0.00-4.80)     | 39     | 3.78#<br>(2.69-5.17)             |
| Diabetes Mellitus                            | 29     | 2.07#                            | 12    | 0.82                             | 4   | 0.62                       | 2  | 0.65                    | 47     | 1.23                             |

|                                                              |     |                      |     |                      |     |                      |    |                      |     |                      |
|--------------------------------------------------------------|-----|----------------------|-----|----------------------|-----|----------------------|----|----------------------|-----|----------------------|
|                                                              |     | (1.38-2.97)          |     | (0.42-1.43)          |     | (0.17-1.58)          |    | (0.08-2.36)          |     | (0.90-1.64)          |
| Alzheimer's                                                  | 8   | 0.61<br>(0.27-1.21)  | 9   | 0.67<br>(0.30-1.26)  | 8   | 1.04<br>(0.45-2.05)  | 7  | 1.40<br>(0.56-2.89)  | 32  | 0.82<br>(0.56-1.15)  |
| Diseases of Heart                                            | 412 | 3.27#<br>(2.96-3.60) | 233 | 1.88#<br>(1.64-2.13) | 109 | 1.95#<br>(1.60-2.35) | 49 | 1.73#<br>(1.28-2.28) | 803 | 2.40#<br>(2.24-2.57) |
| Hypertension<br>without Heart<br>Disease                     | 9   | 2.01<br>(0.92-3.81)  | 7   | 1.49<br>(0.60-3.07)  | 6   | 2.51<br>(0.92-5.47)  | 5  | 3.77#<br>(1.22-8.80) | 27  | 2.09#<br>(1.38-3.05) |
| Cerebrovascular<br>Diseases                                  | 62  | 2.43#<br>(1.86-3.12) | 37  | 1.50#<br>(1.05-2.06) | 17  | 1.49<br>(0.87-2.39)  | 6  | 1.00<br>(0.37-2.18)  | 122 | 1.80#<br>(1.50-2.15) |
| Atherosclerosis                                              | 5   | 2.96<br>(0.96-6.91)  | 0   | 0.00<br>(0.00-2.54)  | 2   | 3.34<br>(0.40-12.06) | 0  | 0.00<br>(0.00-12.9)  | 7   | 1.74<br>(0.70-3.58)  |
| Aortic Aneurysm<br>and Dissection                            | 7   | 2.63#<br>(1.06-5.42) | 3   | 1.18<br>(0.24-3.45)  | 0   | 0.00<br>(0.00-3.67)  | 0  | 0.00<br>(0.00-8.43)  | 10  | 1.50<br>(0.72-2.77)  |
| Other Diseases of<br>Arteries,<br>Arterioles,<br>Capillaries | 2   | 1.12<br>(0.14-4.04)  | 1   | 0.56<br>(0.01-3.12)  | 1   | 1.23<br>(0.03-6.86)  | 2  | 4.90<br>(0.59-17.69) | 6   | 1.25<br>(0.46-2.72)  |
| Pneumonia and<br>Influenza                                   | 53  | 4.82#<br>(3.61-6.31) | 34  | 3.22#<br>(2.23-4.50) | 10  | 2.04<br>(0.98-3.75)  | 4  | 1.58<br>(0.43-4.04)  | 101 | 3.48#<br>(2.84-4.23) |
| Chronic                                                      | 96  | 3.41#                | 86  | 2.89#                | 43  | 3.09#                | 14 | 2.03#                | 239 | 3.04#                |

|                                                    |    |                             |    |                         |   |                         |   |                          |    |                            |
|----------------------------------------------------|----|-----------------------------|----|-------------------------|---|-------------------------|---|--------------------------|----|----------------------------|
| Obstructive Pulmonary Disease                      |    | (2.76-4.16)                 |    | (2.31-3.57)             |   | (2.24-4.17)             |   | (1.11-3.40)              |    | (2.66-3.45)                |
| Stomach and Duodenal Ulcers                        | 3  | 4.65<br>(0.96-13.58)        | 3  | 4.83<br>(1.00-14.12)    | 0 | 0.00<br>(0.00-13.96)    | 0 | 0.00<br>(0.00-28.81)     | 6  | 3.62#<br>(1.33-7.87)       |
| Chronic Liver Disease and Cirrhosis                | 27 | 5.35#<br>(3.52-7.78)        | 7  | 1.28<br>(0.51-2.64)     | 4 | 1.81<br>(0.49-4.63)     | 1 | 1.05<br>(0.03-5.85)      | 39 | 2.85#<br>(2.03-3.90)       |
| Nephritis, Nephrotic Syndrome and Nephrosis        | 25 | 2.78#<br>(1.80-4.11)        | 7  | 0.76<br>(0.30-1.56)     | 8 | 1.82<br>(0.78-3.58)     | 4 | 1.82<br>(0.50-4.65)      | 44 | 1.77#<br>(1.29-2.38)       |
| Complications of Pregnancy, Childbirth, Puerperium | 1  | 588.25#<br>(14.89-3,277.51) | 0  | 0.00<br>(0.00-2,524.23) | 0 | 0.00<br>(0.00-9,525.36) | 0 | 0.00<br>(0.00-21,979.49) | 1  | 269.07#<br>(6.81-1,499.18) |
| Congenital Anomalies                               | 0  | 0.00<br>(0.00-9.31)         | 1  | 2.44<br>(0.06-13.58)    | 1 | 6.03<br>(0.15-33.62)    | 0 | 0.00<br>(0.00-49.98)     | 2  | 1.91<br>(0.23-6.91)        |
| Certain Conditions Originating in Perinatal Period | 0  | 0.00<br>(0.00-2,090.44)     | 0  | 0.00<br>(0.00-1,977.57) | 0 | 0.00<br>(0.00-4,851.20) | 0 | 0.00<br>(0.00-11,700.53) | 0  | 0.00<br>(0.00-783.92)      |
| Symptoms, Signs and Ill-Defined                    | 22 | 4.85#                       | 15 | 3.29#                   | 2 | 0.88                    | 3 | 2.52                     | 42 | 3.35#                      |

|                                   |     |                        |     |                      |    |                      |    |                      |     |                      |
|-----------------------------------|-----|------------------------|-----|----------------------|----|----------------------|----|----------------------|-----|----------------------|
| Conditions                        |     | (3.04-7.34)            |     | (1.84-5.43)          |    | (0.11-3.18)          |    | (0.52-7.36)          |     | (2.41-4.52)          |
| Accidents and Adverse Effects     | 22  | 1.71#<br>(1.07-2.59)   | 23  | 1.70#<br>(1.08-2.55) | 10 | 1.63<br>(0.78-3.00)  | 4  | 1.28<br>(0.35-3.27)  | 59  | 1.65#<br>(1.26-2.13) |
| Suicide and Self-Inflicted Injury | 42  | 11.35#<br>(8.18-15.35) | 16  | 4.05#<br>(2.31-6.57) | 5  | 3.12#<br>(1.01-7.29) | 0  | 0.00<br>(0.00-5.35)  | 63  | 6.34#<br>(4.87-8.11) |
| Homicide and Legal Intervention   | 0   | 0.00<br>(0.00-6.50)    | 2   | 3.70<br>(0.45-13.38) | 0  | 0.00<br>(0.00-19.85) | 0  | 0.00<br>(0.00-53.12) | 2   | 1.47<br>(0.18-5.30)  |
| Other Cause of Death              | 242 | 3.93#<br>(3.45-4.45)   | 142 | 2.17#<br>(1.83-2.56) | 61 | 1.83#<br>(1.40-2.35) | 29 | 1.56#<br>(1.04-2.24) | 474 | 2.65#<br>(2.41-2.90) |

1 number of cancer patients who died due to each cause of death.

2 95% Confidence interval.

# P value less than .05.

**Supplementary table 16: Standardized mortality ratio (SMR) for each cause of death following esophageal cancer diagnosis in Grade IV.**

| Cause of Death | Less than a year      |                            | 1-5 years             |                            | 5-10 years            |                            | More than 10 years    |                            | Total                 |                            |
|----------------|-----------------------|----------------------------|-----------------------|----------------------------|-----------------------|----------------------------|-----------------------|----------------------------|-----------------------|----------------------------|
|                | Observed <sup>1</sup> | SMR (95% CI <sup>2</sup> ) | Observed <sup>1</sup> | SMR (95% CI <sup>2</sup> ) | Observed <sup>1</sup> | SMR (95% CI <sup>2</sup> ) | Observed <sup>1</sup> | SMR (95% CI <sup>2</sup> ) | Observed <sup>1</sup> | SMR (95% CI <sup>2</sup> ) |

|                                              |     |                                  |     |                                |    |                           |    |                          |     |                                  |
|----------------------------------------------|-----|----------------------------------|-----|--------------------------------|----|---------------------------|----|--------------------------|-----|----------------------------------|
| All Causes of Death                          | 560 | 30.05#<br>(27.61-32.65)          | 242 | 10.41#<br>(9.14-11.81)         | 33 | 2.36#<br>(1.63-3.32)      | 15 | 2.46#<br>(1.38-4.06)     | 850 | 13.72#<br>(12.82-14.68)          |
| All Malignant Cancer Causes of Death         | 512 | 114.01#<br>(104.34-124.32)       | 219 | 39.31#<br>(34.27-44.87)        | 16 | 5.17#<br>(2.96-8.40)      | 1  | 0.75<br>(0.02-4.19)      | 748 | 51.63#<br>(48.00-55.47)          |
| Esophageal Cancer Deaths                     | 447 | 3,322.00#<br>(3,021.14-3,644.72) | 193 | 1,145.31#<br>(989.42-1,318.78) | 13 | 139.35#<br>(74.20-238.29) | 1  | 23.94<br>(0.61-133.37)   | 654 | 1,492.67#<br>(1,380.45-1,611.59) |
| Non-cancer Causes of Death                   |     |                                  |     |                                |    |                           |    |                          |     |                                  |
| In situ, benign or unknown behavior neoplasm | 4   | 33.33#<br>(9.08-85.34)           | 1   | 6.41<br>(0.16-35.74)           | 2  | 21.26#<br>(2.57-76.79)    | 0  | 0.00<br>(0.00-83.80)     | 7   | 16.91#<br>(6.80-34.84)           |
| Tuberculosis                                 | 0   | 0.00<br>(0.00-755.17)            | 0   | 0.00<br>(0.00-644.98)          | 0  | 0.00<br>(0.00-1,314.01)   | 0  | 0.00<br>(0.00-3,821.59)  | 0   | 0.00<br>(0.00-256.59)            |
| Syphilis                                     | 0   | 0.00<br>(0.00-13,781.65)         | 0   | 0.00<br>(0.00-13,535.11)       | 0  | 0.00<br>(0.00-24,545.61)  | 0  | 0.00<br>(0.00-46,667.48) | 0   | 0.00<br>(0.00-4,793.61)          |
| Septicemia                                   | 2   | 7.64                             | 1   | 3.06                           | 0  | 0.00                      | 0  | 0.00                     | 3   | 3.43                             |

|                                         |    |                        |    |                      |   |                      |   |                       |    |                       |
|-----------------------------------------|----|------------------------|----|----------------------|---|----------------------|---|-----------------------|----|-----------------------|
|                                         |    | (0.92-27.59)           |    | (0.08-17.05)         |   | (0.00-18.66)         |   | (0.00-41.65)          |    | (0.71-10.02)          |
| Other Infectious Diseases               | 1  | 6.74<br>(0.17-37.55)   | 0  | 0.00<br>(0.00-19.71) | 0 | 0.00<br>(0.00-34.67) | 0 | 0.00<br>(0.00-88.44)  | 1  | 2.07<br>(0.05-11.52)  |
| Diabetes Mellitus                       | 1  | 1.77<br>(0.04-9.84)    | 0  | 0.00<br>(0.00-5.30)  | 0 | 0.00<br>(0.00-9.10)  | 0 | 0.00<br>(0.00-21.25)  | 1  | 0.54<br>(0.01-3.03)   |
| Alzheimer's                             | 0  | 0.00<br>(0.00-6.29)    | 0  | 0.00<br>(0.00-4.68)  | 1 | 1.62<br>(0.04-9.04)  | 1 | 3.77<br>(0.10-21.01)  | 2  | 0.89<br>(0.11-3.20)   |
| Diseases of Heart                       | 18 | 3.43#<br>(2.03-5.42)   | 11 | 1.73<br>(0.86-3.10)  | 7 | 1.91<br>(0.77-3.93)  | 6 | 3.66#<br>(1.34-7.96)  | 42 | 2.48#<br>(1.79-3.36)  |
| Hypertension without Heart Disease      | 1  | 5.36<br>(0.14-29.88)   | 0  | 0.00<br>(0.00-15.28) | 0 | 0.00<br>(0.00-21.81) | 0 | 0.00<br>(0.00-51.93)  | 1  | 1.50<br>(0.04-8.34)   |
| Cerebrovascular Diseases                | 4  | 3.61<br>(0.98-9.24)    | 1  | 0.77<br>(0.02-4.27)  | 1 | 1.24<br>(0.03-6.92)  | 1 | 3.05<br>(0.08-16.98)  | 7  | 1.97<br>(0.79-4.07)   |
| Atherosclerosis                         | 2  | 26.22#<br>(3.18-94.73) | 0  | 0.00<br>(0.00-45.26) | 0 | 0.00<br>(0.00-86.14) | 0 | 0.00<br>(0.00-232.62) | 2  | 9.24#<br>(1.12-33.38) |
| Aortic Aneurysm and Dissection          | 1  | 8.95<br>(0.23-49.85)   | 0  | 0.00<br>(0.00-29.18) | 0 | 0.00<br>(0.00-58.39) | 0 | 0.00<br>(0.00-147.57) | 1  | 3.06<br>(0.08-17.07)  |
| Other Diseases of Arteries, Arterioles, | 0  | 0.00<br>(0.00-48.69)   | 0  | 0.00<br>(0.00-41.00) | 0 | 0.00<br>(0.00-68.88) | 0 | 0.00<br>(0.00-159.59) | 0  | 0.00<br>(0.00-15.22)  |

|                                                    |   |                          |   |                          |   |                           |   |                             |   |                          |
|----------------------------------------------------|---|--------------------------|---|--------------------------|---|---------------------------|---|-----------------------------|---|--------------------------|
| Capillaries                                        |   |                          |   |                          |   |                           |   |                             |   |                          |
| Pneumonia and Influenza                            | 0 | 0.00<br>(0.00-7.92)      | 0 | 0.00<br>(0.00-6.48)      | 2 | 6.10<br>(0.74-22.02)      | 0 | 0.00<br>(0.00-25.75)        | 2 | 1.33<br>(0.16-4.80)      |
| Chronic Obstructive Pulmonary Disease              | 1 | 0.86<br>(0.02-4.81)      | 1 | 0.67<br>(0.02-3.75)      | 0 | 0.00<br>(0.00-4.13)       | 1 | 2.55<br>(0.06-14.19)        | 3 | 0.76<br>(0.16-2.23)      |
| Stomach and Duodenal Ulcers                        | 0 | 0.00<br>(0.00-135.54)    | 0 | 0.00<br>(0.00-117.16)    | 0 | 0.00<br>(0.00-211.18)     | 0 | 0.00<br>(0.00-524.28)       | 0 | 0.00<br>(0.00-44.33)     |
| Chronic Liver Disease and Cirrhosis                | 0 | 0.00<br>(0.00-19.12)     | 0 | 0.00<br>(0.00-15.75)     | 0 | 0.00<br>(0.00-29.02)      | 1 | 20.66<br>(0.52-115.11)      | 1 | 1.66<br>(0.04-9.25)      |
| Nephritis, Nephrotic Syndrome and Nephrosis        | 0 | 0.00<br>(0.00-10.18)     | 0 | 0.00<br>(0.00-7.90)      | 1 | 3.60<br>(0.09-20.04)      | 0 | 0.00<br>(0.00-28.32)        | 1 | 0.81<br>(0.02-4.50)      |
| Complications of Pregnancy, Childbirth, Puerperium | 0 | 0.00<br>(0.00-47,906.75) | 0 | 0.00<br>(0.00-66,869.94) | 0 | 0.00<br>(0.00-231,694.18) | 0 | 0.00<br>(0.00-5,900,866.63) | 0 | 0.00<br>(0.00-24,805.41) |
| Congenital Anomalies                               | 0 | 0.00<br>(0.00-234.14)    | 0 | 0.00<br>(0.00-198.96)    | 0 | 0.00<br>(0.00-368.52)     | 0 | 0.00<br>(0.00-966.25)       | 0 | 0.00<br>(0.00-76.65)     |



|                                                    |    |                          |   |                          |   |                          |   |                           |    |                          |
|----------------------------------------------------|----|--------------------------|---|--------------------------|---|--------------------------|---|---------------------------|----|--------------------------|
| Certain Conditions Originating in Perinatal Period | 0  | 0.00<br>(0.00-57,687.28) | 0 | 0.00<br>(0.00-49,172.59) | 0 | 0.00<br>(0.00-88,505.47) | 0 | 0.00<br>(0.00-219,845.10) | 0  | 0.00<br>(0.00-18,685.03) |
| Symptoms, Signs and Ill-Defined Conditions         | 0  | 0.00<br>(0.00-19.08)     | 1 | 4.01<br>(0.10-22.35)     | 0 | 0.00<br>(0.00-21.72)     | 0 | 0.00<br>(0.00-57.61)      | 1  | 1.48<br>(0.04-8.24)      |
| Accidents and Adverse Effects                      | 0  | 0.00<br>(0.00-7.21)      | 1 | 1.54<br>(0.04-8.59)      | 0 | 0.00<br>(0.00-9.47)      | 1 | 5.76<br>(0.15-32.07)      | 2  | 1.16<br>(0.14-4.19)      |
| Suicide and Self-Inflicted Injury                  | 2  | 14.09#<br>(1.71-50.89)   | 1 | 5.91<br>(0.15-32.91)     | 0 | 0.00<br>(0.00-41.86)     | 0 | 0.00<br>(0.00-98.72)      | 3  | 6.87#<br>(1.42-20.07)    |
| Homicide and Legal Intervention                    | 0  | 0.00<br>(0.00-174.85)    | 0 | 0.00<br>(0.00-168.38)    | 0 | 0.00<br>(0.00-379.68)    | 0 | 0.00<br>(0.00-1,131.76)   | 0  | 0.00<br>(0.00-65.90)     |
| Other Cause of Death                               | 11 | 4.30#<br>(2.15-7.69)     | 5 | 1.47<br>(0.48-3.42)      | 3 | 1.29<br>(0.27-3.76)      | 3 | 2.87<br>(0.59-8.39)       | 22 | 2.35#<br>(1.48-3.56)     |

1 number of cancer patients who died due to each cause of death.

2 95% Confidence interval.

# P value less than .05.

**Supplementary table 17: Standardized mortality ratio (SMR) for each cause of death following esophageal cancer diagnosis in patients who underwent cancer-directed surgery.**

| Cause of Death                               | Less than a year      |                            | 1-5 years             |                            | 5-10 years            |                            | More than 10 years    |                            | Total                 |                            |
|----------------------------------------------|-----------------------|----------------------------|-----------------------|----------------------------|-----------------------|----------------------------|-----------------------|----------------------------|-----------------------|----------------------------|
|                                              | Observed <sup>1</sup> | SMR (95% CI <sup>2</sup> ) | Observed <sup>1</sup> | SMR (95% CI <sup>2</sup> ) | Observed <sup>1</sup> | SMR (95% CI <sup>2</sup> ) | Observed <sup>1</sup> | SMR (95% CI <sup>2</sup> ) | Observed <sup>1</sup> | SMR (95% CI <sup>2</sup> ) |
| All Causes of Death                          | 3,145                 | 10.64#<br>(10.27-11.02)    | 5,273                 | 7.74#<br>(7.53-7.95)       | 1,137                 | 2.48#<br>(2.34-2.63)       | 440                   | 1.75#<br>(1.59-1.92)       | 9,995                 | 5.93#<br>(5.81-6.05)       |
| All Malignant Cancer Causes of Death         | 2,577                 | 30.87#<br>(29.69-32.09)    | 4,503                 | 24.28#<br>(23.58-25.00)    | 649                   | 5.68#<br>(5.25-6.13)       | 180                   | 3.24#<br>(2.78-3.74)       | 7,909                 | 18.02#<br>(17.63-18.43)    |
| Esophageal Cancer Deaths                     | 2,359                 | 802.88#<br>(770.80-835.94) | 3,992                 | 619.01#<br>(599.95-638.51) | 448                   | 117.29#<br>(106.68-128.67) | 99                    | 56.55#<br>(45.96-68.84)    | 6,898                 | 461.17#<br>(450.35-472.19) |
| Non-cancer Causes of Death                   |                       |                            |                       |                            |                       |                            |                       |                            |                       |                            |
| In situ, benign or unknown behavior neoplasm | 2                     | 1.06<br>(0.13-3.84)        | 14                    | 3.10#<br>(1.69-5.20)       | 10                    | 3.13#<br>(1.50-5.75)       | 1                     | 0.57<br>(0.01-3.15)        | 27                    | 2.38#<br>(1.57-3.46)       |
| Tuberculosis                                 | 0                     | 0.00<br>(0.00-47.65)       | 0                     | 0.00<br>(0.00-23.01)       | 1                     | 10.49<br>(0.27-58.46)      | 0                     | 0.00<br>(0.00-81.22)       | 1                     | 2.64<br>(0.07-14.72)       |
| Syphilis                                     | 0                     | 0.00<br>(0.00-843.68)      | 0                     | 0.00<br>(0.00-373.22)      | 0                     | 0.00<br>(0.00-582.68)      | 0                     | 0.00<br>(0.00-1,125.2)     | 0                     | 0.00<br>(0.00-154.57)      |

|                                    |     |                        |     |                      |     |                      |    |                      |     |                      |
|------------------------------------|-----|------------------------|-----|----------------------|-----|----------------------|----|----------------------|-----|----------------------|
|                                    |     |                        |     |                      |     |                      |    | 2)                   |     | )                    |
| Septicemia                         | 45  | 10.88#<br>(7.94-14.56) | 38  | 3.93#<br>(2.78-5.39) | 17  | 2.59#<br>(1.51-4.15) | 4  | 1.11<br>(0.30-2.83)  | 104 | 4.34#<br>(3.54-5.25) |
| Other Infectious Diseases          | 9   | 3.07#<br>(1.40-5.83)   | 10  | 1.57<br>(0.75-2.89)  | 4   | 1.06<br>(0.29-2.71)  | 1  | 0.56<br>(0.01-3.09)  | 24  | 1.61#<br>(1.03-2.40) |
| Diabetes Mellitus                  | 5   | 0.51<br>(0.17-1.19)    | 14  | 0.64<br>(0.35-1.07)  | 7   | 0.50<br>(0.20-1.03)  | 4  | 0.55<br>(0.15-1.42)  | 30  | 0.57#<br>(0.38-0.81) |
| Alzheimer's                        | 0   | 0.00#<br>(0.00-0.63)   | 8   | 0.48#<br>(0.21-0.95) | 16  | 1.07<br>(0.61-1.74)  | 17 | 1.53<br>(0.89-2.45)  | 41  | 0.84<br>(0.61-1.15)  |
| Diseases of Heart                  | 159 | 2.04#<br>(1.73-2.38)   | 251 | 1.42#<br>(1.25-1.60) | 165 | 1.39#<br>(1.19-1.62) | 94 | 1.42#<br>(1.15-1.74) | 669 | 1.52#<br>(1.41-1.64) |
| Hypertension without Heart Disease | 5   | 1.96<br>(0.64-4.58)    | 7   | 1.10<br>(0.44-2.27)  | 7   | 1.47<br>(0.59-3.02)  | 5  | 1.68<br>(0.54-3.91)  | 24  | 1.44<br>(0.92-2.14)  |
| Cerebrovascular Diseases           | 29  | 2.01#<br>(1.35-2.89)   | 31  | 0.93<br>(0.63-1.32)  | 30  | 1.30<br>(0.87-1.85)  | 13 | 0.96<br>(0.51-1.63)  | 103 | 1.22<br>(0.99-1.48)  |
| Atherosclerosis                    | 1   | 1.19<br>(0.03-6.60)    | 1   | 0.55<br>(0.01-3.04)  | 1   | 0.84<br>(0.02-4.67)  | 1  | 1.57<br>(0.04-8.75)  | 4   | 0.89<br>(0.24-2.27)  |
| Aortic Aneurysm and Dissection     | 3   | 1.65<br>(0.34-4.82)    | 5   | 1.31<br>(0.43-3.06)  | 0   | 0.00<br>(0.00-1.67)  | 2  | 1.93<br>(0.23-6.97)  | 10  | 1.13<br>(0.54-2.07)  |

|                                                     |    |                         |    |                         |    |                         |    |                          |     |                       |
|-----------------------------------------------------|----|-------------------------|----|-------------------------|----|-------------------------|----|--------------------------|-----|-----------------------|
| Other Diseases of Arteries, Arterioles, Capillaries | 1  | 0.91<br>(0.02-5.09)     | 5  | 1.98<br>(0.64-4.63)     | 3  | 1.77<br>(0.36-5.16)     | 2  | 2.12<br>(0.26-7.67)      | 11  | 1.76<br>(0.88-3.15)   |
| Pneumonia and Influenza                             | 34 | 5.74#<br>(3.98-8.02)    | 30 | 2.14#<br>(1.44-3.05)    | 20 | 1.98#<br>(1.21-3.06)    | 10 | 1.72<br>(0.82-3.16)      | 94  | 2.62#<br>(2.12-3.21)  |
| Chronic Obstructive Pulmonary Disease               | 47 | 2.47#<br>(1.82-3.29)    | 89 | 1.98#<br>(1.59-2.44)    | 47 | 1.53#<br>(1.13-2.04)    | 29 | 1.77#<br>(1.19-2.54)     | 212 | 1.91#<br>(1.66-2.19)  |
| Stomach and Duodenal Ulcers                         | 0  | 0.00<br>(0.00-8.91)     | 1  | 1.11<br>(0.03-6.19)     | 2  | 3.54<br>(0.43-12.79)    | 0  | 0.00<br>(0.00-12.40)     | 3   | 1.38<br>(0.28-4.03)   |
| Chronic Liver Disease and Cirrhosis                 | 16 | 3.45#<br>(1.97-5.60)    | 10 | 1.03<br>(0.49-1.90)     | 6  | 1.15<br>(0.42-2.50)     | 3  | 1.31<br>(0.27-3.83)      | 35  | 1.60#<br>(1.11-2.23)  |
| Nephritis, Nephrotic Syndrome and Nephrosis         | 13 | 2.44#<br>(1.30-4.17)    | 18 | 1.40<br>(0.83-2.21)     | 9  | 0.98<br>(0.45-1.87)     | 7  | 1.36<br>(0.55-2.80)      | 47  | 1.45#<br>(1.06-1.92)  |
| Complications of Pregnancy, Childbirth, Puerperium  | 0  | 0.00<br>(0.00-2,016.67) | 0  | 0.00<br>(0.00-1,205.13) | 0  | 0.00<br>(0.00-3,612.04) | 0  | 0.00<br>(0.00-12,797.70) | 0   | 0.00<br>(0.00-595.01) |
| Congenital                                          | 0  | 0.00                    | 0  | 0.00                    | 1  | 2.65                    | 0  | 0.00                     | 1   | 0.64                  |

| Anomalies                                          |     | (0.00-11.11)            |     | (0.00-5.36)             |     | (0.07-14.79)            |    | (0.00-21.16)            |     | (0.02-3.55)           |
|----------------------------------------------------|-----|-------------------------|-----|-------------------------|-----|-------------------------|----|-------------------------|-----|-----------------------|
| Certain Conditions Originating in Perinatal Period | 0   | 0.00<br>(0.00-2,352.01) | 0   | 0.00<br>(0.00-1,140.92) | 0   | 0.00<br>(0.00-2,139.73) | 0  | 0.00<br>(0.00-4,903.11) | 0   | 0.00<br>(0.00-506.85) |
| Symptoms, Signs and Ill-Defined Conditions         | 18  | 7.00#<br>(4.15-11.06)   | 14  | 2.23#<br>(1.22-3.74)    | 2   | 0.43<br>(0.05-1.56)     | 6  | 2.29<br>(0.84-4.98)     | 40  | 2.48#<br>(1.77-3.38)  |
| Accidents and Adverse Effects                      | 9   | 0.95<br>(0.43-1.80)     | 36  | 1.69#<br>(1.18-2.34)    | 24  | 1.76#<br>(1.13-2.62)    | 8  | 1.08<br>(0.47-2.13)     | 77  | 1.48#<br>(1.17-1.86)  |
| Suicide and Self-Inflicted Injury                  | 11  | 3.24#<br>(1.62-5.80)    | 12  | 1.69<br>(0.88-2.96)     | 6   | 1.55<br>(0.57-3.37)     | 1  | 0.59<br>(0.01-3.28)     | 30  | 1.87#<br>(1.26-2.67)  |
| Homicide and Legal Intervention                    | 0   | 0.00<br>(0.00-7.35)     | 1   | 1.07<br>(0.03-5.96)     | 0   | 0.00<br>(0.00-8.63)     | 0  | 0.00<br>(0.00-22.17)    | 1   | 0.49<br>(0.01-2.74)   |
| Other Cause of Death                               | 161 | 4.34#<br>(3.70-5.07)    | 175 | 1.88#<br>(1.61-2.18)    | 110 | 1.56#<br>(1.29-1.89)    | 52 | 1.21<br>(0.90-1.59)     | 498 | 2.05#<br>(1.87-2.24)  |

**1** number of cancer patients who died due to each cause of death.

**2** 95% Confidence interval.

# P value less than .05.

**Supplementary table 18: Standardized mortality ratio (SMR) for each cause of death following esophageal cancer diagnosis in patients whose surgery was not recommended.**

| Cause of Death                               | Less than a year      |                                  | 1-5 years             |                                  | 5-10 years            |                            | More than 10 years    |                            | Total                 |                                  |
|----------------------------------------------|-----------------------|----------------------------------|-----------------------|----------------------------------|-----------------------|----------------------------|-----------------------|----------------------------|-----------------------|----------------------------------|
|                                              | Observed <sup>1</sup> | SMR (95% CI <sup>2</sup> )       | Observed <sup>1</sup> | SMR (95% CI <sup>2</sup> )       | Observed <sup>1</sup> | SMR (95% CI <sup>2</sup> ) | Observed <sup>1</sup> | SMR (95% CI <sup>2</sup> ) | Observed <sup>1</sup> | SMR (95% CI <sup>2</sup> )       |
| All Causes of Death                          | 24,082                | 32.89#<br>(32.47-33.31)          | 9,018                 | 14.15#<br>(13.86-14.45)          | 727                   | 3.30#<br>(3.07-3.55)       | 196                   | 2.76#<br>(2.38-3.17)       | 34,023                | 20.49#<br>(20.27-20.71)          |
| All Malignant Cancer Causes of Death         | 22,023                | 128.97#<br>(127.27-130.68)       | 7,986                 | 54.95#<br>(53.75-56.17)          | 379                   | 8.00#<br>(7.22-8.85)       | 83                    | 5.86#<br>(4.67-7.27)       | 30,471                | 80.69#<br>(79.79-81.60)          |
| Esophageal Cancer Deaths                     | 19,894                | 3,924.46#<br>(3,870.11-3,979.38) | 7,126                 | 1,716.24#<br>(1,676.62-1,756.56) | 258                   | 199.13#<br>(175.57-224.97) | 43                    | 114.63#<br>(82.96-154.40)  | 27,321                | 2,508.33#<br>(2,478.67-2,538.25) |
| Non-cancer Causes of Death                   |                       |                                  |                       |                                  |                       |                            |                       |                            |                       |                                  |
| In situ, benign or unknown behavior neoplasm | 63                    | 13.22#<br>(10.16-16.91)          | 26                    | 6.14#<br>(4.01-9.00)             | 3                     | 2.02<br>(0.42-5.91)        | 0                     | 0.00<br>(0.00-7.56)        | 92                    | 8.39#<br>(6.76-10.29)            |
| Tuberculosis                                 | 1                     | 5.12<br>(0.13-28.55)             | 0                     | 0.00<br>(0.00-23.19)             | 0                     | 0.00<br>(0.00-69.94)       | 0                     | 0.00<br>(0.00-235.72)      | 1                     | 2.37<br>(0.06-13.18)             |

|                                    |     |                       |     |                       |     |                       |    |                         |       |                       |
|------------------------------------|-----|-----------------------|-----|-----------------------|-----|-----------------------|----|-------------------------|-------|-----------------------|
| Syphilis                           | 0   | 0.00<br>(0.00-301.24) | 0   | 0.00<br>(0.00-365.67) | 0   | 0.00<br>(0.00-995.95) | 0  | 0.00<br>(0.00-3,589.48) | 0     | 0.00<br>(0.00-136.30) |
| Septicemia                         | 65  | 6.15#<br>(4.74-7.83)  | 40  | 4.31#<br>(3.08-5.87)  | 9   | 2.77#<br>(1.27-5.26)  | 3  | 2.93<br>(0.60-8.55)     | 117   | 4.85#<br>(4.01-5.81)  |
| Other Infectious Diseases          | 58  | 9.72#<br>(7.38-12.56) | 21  | 4.23#<br>(2.62-6.47)  | 6   | 3.61#<br>(1.33-7.87)  | 0  | 0.00<br>(0.00-7.48)     | 85    | 6.49#<br>(5.19-8.03)  |
| Diabetes Mellitus                  | 51  | 2.30#<br>(1.71-3.02)  | 29  | 1.52#<br>(1.02-2.19)  | 6   | 0.93<br>(0.34-2.03)   | 3  | 1.52<br>(0.31-4.45)     | 89    | 1.79#<br>(1.44-2.21)  |
| Alzheimer's                        | 17  | 0.69<br>(0.40-1.10)   | 15  | 0.63<br>(0.35-1.04)   | 11  | 1.13<br>(0.56-2.02)   | 2  | 0.55<br>(0.07-1.98)     | 45    | 0.73#<br>(0.53-0.97)  |
| Diseases of Heart                  | 720 | 3.51#<br>(3.26-3.78)  | 366 | 2.08#<br>(1.87-2.31)  | 132 | 2.23#<br>(1.87-2.64)  | 38 | 1.99#<br>(1.41-2.73)    | 1,256 | 2.74#<br>(2.59-2.89)  |
| Hypertension without Heart Disease | 30  | 3.78#<br>(2.55-5.40)  | 14  | 1.94#<br>(1.06-3.26)  | 5   | 1.80<br>(0.58-4.19)   | 1  | 1.06<br>(0.03-5.88)     | 50    | 2.65#<br>(1.97-3.49)  |
| Cerebrovascular Diseases           | 115 | 2.67#<br>(2.20-3.20)  | 59  | 1.58#<br>(1.20-2.04)  | 18  | 1.40<br>(0.83-2.21)   | 7  | 1.67<br>(0.67-3.45)     | 199   | 2.04#<br>(1.77-2.35)  |
| Atherosclerosis                    | 13  | 4.63#<br>(2.47-7.92)  | 7   | 3.03#<br>(1.22-6.24)  | 1   | 1.45<br>(0.04-8.05)   | 0  | 0.00<br>(0.00-18.12)    | 21    | 3.49#<br>(2.16-5.34)  |

|                                                     |     |                             |     |                         |    |                       |    |                       |     |                         |
|-----------------------------------------------------|-----|-----------------------------|-----|-------------------------|----|-----------------------|----|-----------------------|-----|-------------------------|
| Aortic Aneurysm and Dissection                      | 13  | 3.24#<br>(1.72-5.53)        | 5   | 1.52<br>(0.50-3.56)     | 2  | 2.06<br>(0.25-7.45)   | 0  | 0.00<br>(0.00-13.33)  | 20  | 2.34#<br>(1.43-3.62)    |
| Other Diseases of Arteries, Arterioles, Capillaries | 9   | 3.06#<br>(1.40-5.81)        | 5   | 1.97<br>(0.64-4.59)     | 1  | 1.15<br>(0.03-6.41)   | 1  | 3.66<br>(0.09-20.37)  | 16  | 2.42#<br>(1.38-3.92)    |
| Pneumonia and Influenza                             | 71  | 3.80#<br>(2.97-4.80)        | 36  | 2.21#<br>(1.55-3.06)    | 9  | 1.62<br>(0.74-3.08)   | 6  | 3.32#<br>(1.22-7.23)  | 122 | 2.89#<br>(2.40-3.44)    |
| Chronic Obstructive Pulmonary Disease               | 180 | 4.01#<br>(3.45-4.64)        | 115 | 2.89#<br>(2.39-3.47)    | 46 | 3.36#<br>(2.46-4.48)  | 18 | 4.13#<br>(2.45-6.52)  | 359 | 3.50#<br>(3.14-3.88)    |
| Stomach and Duodenal Ulcers                         | 5   | 4.88#<br>(1.58-11.38)       | 4   | 4.68#<br>(1.28-11.99)   | 0  | 0.00<br>(0.00-13.57)  | 1  | 11.90<br>(0.30-66.29) | 10  | 4.47#<br>(2.14-8.23)    |
| Chronic Liver Disease and Cirrhosis                 | 55  | 7.89#<br>(5.94-10.27)       | 17  | 3.09#<br>(1.80-4.94)    | 7  | 4.15#<br>(1.67-8.56)  | 3  | 6.16#<br>(1.27-17.99) | 82  | 5.60#<br>(4.45-6.95)    |
| Nephritis, Nephrotic Syndrome and Nephrosis         | 42  | 2.78#<br>(2.00-3.75)        | 17  | 1.26<br>(0.73-2.02)     | 7  | 1.46<br>(0.59-3.01)   | 3  | 1.95<br>(0.40-5.70)   | 69  | 1.97#<br>(1.54-2.50)    |
| Complications of Pregnancy,                         | 2   | 617.61#<br>(74.80-2,231.02) | 0   | 0.00<br>(0.00-1,301.48) | 0  | 0.00<br>(0.00-4,215.1 | 0  | 0.00<br>(0.00-17,064. | 2   | 279.17#<br>(33.81-1,008 |



|                                                    |     |                         |     |                             |    |                         |    |                       |     |                            |
|----------------------------------------------------|-----|-------------------------|-----|-----------------------------|----|-------------------------|----|-----------------------|-----|----------------------------|
| Childbirth, Puerperium                             |     |                         |     |                             |    | 2)                      |    | 40)                   |     | .47)                       |
| Congenital Anomalies                               | 3   | 5.20#<br>(1.07-15.19)   | 1   | 2.16<br>(0.05-12.01)        | 0  | 0.00<br>(0.00-25.58)    | 0  | 0.00<br>(0.00-85.11)  | 4   | 3.26<br>(0.89-8.33)        |
| Certain Conditions Originating in Perinatal Period | 0   | 0.00<br>(0.00-1,489.62) | 1   | 511.88#<br>(12.96-2,852.01) | 0  | 0.00<br>(0.00-6,200.72) | 0  | 0.00(0.00-19,571.68)  | 1   | 191.81#<br>(4.86-1,068.72) |
| Symptoms, Signs and Ill-Defined Conditions         | 50  | 6.39#<br>(4.74-8.42)    | 28  | 4.00#<br>(2.66-5.77)        | 4  | 1.54<br>(0.42-3.94)     | 1  | 1.19<br>(0.03-6.65)   | 83  | 4.54#<br>(3.62-5.63)       |
| Accidents and Adverse Effects                      | 43  | 2.12#<br>(1.53-2.85)    | 24  | 1.39<br>(0.89-2.06)         | 10 | 1.67<br>(0.80-3.07)     | 3  | 1.49<br>(0.31-4.35)   | 80  | 1.75#<br>(1.39-2.18)       |
| Suicide and Self-Inflicted Injury                  | 62  | 12.32#<br>(9.45-15.80)  | 12  | 3.07#<br>(1.58-5.35)        | 2  | 1.69<br>(0.21-6.12)     | 3  | 8.60#<br>(1.77-25.13) | 79  | 7.54#<br>(5.97-9.40)       |
| Homicide and Legal Intervention                    | 0   | 0.00<br>(0.00-4.45)     | 5   | 8.55#<br>(2.78-19.95)       | 0  | 0.00<br>(0.00-23.06)    | 0  | 0.00<br>(0.00-85.89)  | 5   | 3.09#<br>(1.00-7.21)       |
| Other Cause of Death                               | 391 | 3.69#<br>(3.34-4.08)    | 185 | 1.91#<br>(1.65-2.21)        | 69 | 1.88#<br>(1.46-2.38)    | 20 | 1.57<br>(0.96-2.42)   | 665 | 2.64#<br>(2.44-2.85)       |

1 number of cancer patients who died due to each cause of death.

2 95% Confidence interval.

# P value less than .05.

**Supplementary table 19: Standardized mortality ratio (SMR) for each cause of death following esophageal cancer diagnosis in patients who received radiotherapy.**

| Cause of Death                               | Less than a year      |                                  | 1-5 years             |                                  | 5-10 years            |                            | More than 10 years    |                            | Total                 |                                  |
|----------------------------------------------|-----------------------|----------------------------------|-----------------------|----------------------------------|-----------------------|----------------------------|-----------------------|----------------------------|-----------------------|----------------------------------|
|                                              | Observed <sup>1</sup> | SMR (95% CI <sup>2</sup> )       | Observed <sup>1</sup> | SMR (95% CI <sup>2</sup> )       | Observed <sup>1</sup> | SMR (95% CI <sup>2</sup> ) | Observed <sup>1</sup> | SMR (95% CI <sup>2</sup> ) | Observed <sup>1</sup> | SMR (95% CI <sup>2</sup> )       |
| All Causes of Death                          | 14,168                | 19.94#<br>(19.61-20.27)          | 10,984                | 12.66#<br>(12.42-12.90)          | 1,252                 | 3.44#<br>(3.25-3.63)       | 387                   | 2.52#<br>(2.28-2.79)       | 26,791                | 12.78#<br>(12.63-12.94)          |
| All Malignant Cancer Causes of Death         | 12,829                | 72.31#<br>(71.07-73.58)          | 9,658                 | 44.71#<br>(43.82-45.61)          | 708                   | 8.12#<br>(7.53-8.74)       | 163                   | 4.69#<br>(4.00-5.47)       | 23,358                | 45.32#<br>(44.74-45.91)          |
| Esophageal Cancer Deaths                     | 11,843                | 2,126.00#<br>(2,087.88-2,164.64) | 8,759                 | 1,290.99#<br>(1,264.10-1,318.32) | 487                   | 180.83#<br>(165.12-197.63) | 85                    | 79.68#<br>(63.65-98.53)    | 21,174                | 1,313.92#<br>(1,296.28-1,331.74) |
| Non-cancer Causes of Death                   |                       |                                  |                       |                                  |                       |                            |                       |                            |                       |                                  |
| In situ, benign or unknown behavior neoplasm | 23                    | 5.02#<br>(3.18-7.54)             | 32                    | 5.65#<br>(3.86-7.97)             | 8                     | 3.27#<br>(1.41-6.45)       | 0                     | 0.00<br>(0.00-3.49)        | 63                    | 4.58#<br>(3.52-5.86)             |

|                                    |     |                       |     |                       |     |                       |    |                         |       |                       |
|------------------------------------|-----|-----------------------|-----|-----------------------|-----|-----------------------|----|-------------------------|-------|-----------------------|
| Tuberculosis                       | 0   | 0.00<br>(0.00-19.13)  | 0   | 0.00<br>(0.00-17.05)  | 1   | 12.22<br>(0.31-68.06) | 0  | 0.00<br>(0.00-119.23)   | 1     | 1.92<br>(0.05-10.67)  |
| Syphilis                           | 0   | 0.00<br>(0.00-303.43) | 0   | 0.00<br>(0.00-251.90) | 0   | 0.00<br>(0.00-569.66) | 0  | 0.00<br>(0.00-1,557.94) | 0     | 0.00<br>(0.00-103.49) |
| Septicemia                         | 67  | 6.52#<br>(5.05-8.27)  | 59  | 4.64#<br>(3.53-5.99)  | 19  | 3.51#<br>(2.12-5.49)  | 11 | 4.87#<br>(2.43-8.71)    | 156   | 5.09#<br>(4.32-5.95)  |
| Other Infectious Diseases          | 34  | 5.43#<br>(3.76-7.58)  | 21  | 2.80#<br>(1.73-4.27)  | 8   | 2.65#<br>(1.15-5.23)  | 0  | 0.00<br>(0.00-3.19)     | 63    | 3.51#<br>(2.70-4.49)  |
| Diabetes Mellitus                  | 28  | 1.25<br>(0.83-1.81)   | 26  | 0.95<br>(0.62-1.39)   | 10  | 0.89<br>(0.43-1.63)   | 3  | 0.65<br>(0.13-1.91)     | 67    | 1.02<br>(0.79-1.30)   |
| Alzheimer's                        | 3   | 0.15#<br>(0.03-0.43)  | 14  | 0.52#<br>(0.28-0.87)  | 17  | 1.29<br>(0.75-2.06)   | 5  | 0.77<br>(0.25-1.79)     | 39    | 0.58#<br>(0.41-0.79)  |
| Diseases of Heart                  | 472 | 2.42#<br>(2.20-2.64)  | 462 | 1.98#<br>(1.81-2.17)  | 190 | 1.99#<br>(1.72-2.29)  | 79 | 1.99#<br>(1.57-2.47)    | 1,203 | 2.13#<br>(2.02-2.26)  |
| Hypertension without Heart Disease | 12  | 1.66<br>(0.86-2.89)   | 15  | 1.63<br>(0.91-2.69)   | 7   | 1.65<br>(0.67-3.41)   | 4  | 2.13<br>(0.58-5.46)     | 38    | 1.68#<br>(1.19-2.31)  |
| Cerebrovascular Diseases           | 47  | 1.18<br>(0.87-1.57)   | 58  | 1.22<br>(0.93-1.58)   | 30  | 1.53#<br>(1.03-2.18)  | 10 | 1.20<br>(0.57-2.20)     | 145   | 1.26#<br>(1.06-1.48)  |
| Atherosclerosis                    | 7   | 2.81#                 | 5   | 1.80                  | 1   | 0.98                  | 0  | 0.00                    | 13    | 1.95#                 |

|                                                     |     |                      |     |                      |    |                      |    |                      |     |                      |
|-----------------------------------------------------|-----|----------------------|-----|----------------------|----|----------------------|----|----------------------|-----|----------------------|
|                                                     |     | (1.13-5.79)          |     | (0.59-4.21)          |    | (0.02-5.45)          |    | (0.00-9.64)          |     | (1.04-3.33)          |
| Aortic Aneurysm and Dissection                      | 10  | 2.48#<br>(1.19-4.56) | 11  | 2.40#<br>(1.20-4.29) | 2  | 1.19<br>(0.14-4.29)  | 0  | 0.00<br>(0.00-5.84)  | 23  | 2.10#<br>(1.33-3.15) |
| Other Diseases of Arteries, Arterioles, Capillaries | 6   | 2.15<br>(0.79-4.68)  | 5   | 1.48<br>(0.48-3.46)  | 3  | 2.13<br>(0.44-6.23)  | 1  | 1.72<br>(0.04-9.57)  | 15  | 1.84#<br>(1.03-3.03) |
| Pneumonia and Influenza                             | 64  | 3.80#<br>(2.93-4.85) | 59  | 2.94#<br>(2.24-3.79) | 17 | 2.03#<br>(1.19-3.26) | 9  | 2.57#<br>(1.17-4.87) | 149 | 3.05#<br>(2.58-3.59) |
| Chronic Obstructive Pulmonary Disease               | 103 | 2.34#<br>(1.91-2.83) | 147 | 2.68#<br>(2.27-3.15) | 75 | 3.22#<br>(2.53-4.04) | 35 | 3.54#<br>(2.46-4.92) | 360 | 2.73#<br>(2.45-3.02) |
| Stomach and Duodenal Ulcers                         | 2   | 2.01<br>(0.24-7.24)  | 4   | 3.45<br>(0.94-8.85)  | 1  | 2.23<br>(0.06-12.40) | 0  | 0.00<br>(0.00-20.17) | 7   | 2.51#<br>(1.01-5.17) |
| Chronic Liver Disease and Cirrhosis                 | 34  | 4.20#<br>(2.91-5.87) | 25  | 2.54#<br>(1.64-3.75) | 9  | 2.39#<br>(1.09-4.53) | 4  | 2.71<br>(0.74-6.95)  | 72  | 3.11#<br>(2.43-3.91) |
| Nephritis, Nephrotic Syndrome and Nephrosis         | 28  | 1.96#<br>(1.31-2.84) | 19  | 1.08<br>(0.65-1.68)  | 10 | 1.31<br>(0.63-2.41)  | 6  | 1.88<br>(0.69-4.09)  | 63  | 1.48#<br>(1.13-1.89) |
| Complications of Pregnancy,                         | 0   | 0.00                 | 0   | 0.00                 | 0  | 0.00                 | 0  | 0.00                 | 0   | 0.00                 |

|                                                          |     |                         |     |                                |     |                             |    |                             |     |                              |
|----------------------------------------------------------|-----|-------------------------|-----|--------------------------------|-----|-----------------------------|----|-----------------------------|-----|------------------------------|
| Childbirth,<br>Puerperium                                |     | (0.00-1,023.80)         |     | (0.00-875.86)                  |     | (0.00-2,887.8<br>2)         |    | (0.00-8,876.2<br>7)         |     | (0.00-387.98<br>)            |
| Congenital<br>Anomalies                                  | 0   | 0.00<br>(0.00-5.84)     | 1   | 1.32<br>(0.03-7.37)            | 1   | 3.48<br>(0.09-19.41)        | 0  | 0.00<br>(0.00-32.93)        | 2   | 1.12<br>(0.14-4.04)          |
| Certain Conditions<br>Originating in<br>Perinatal Period | 0   | 0.00<br>(0.00-1,302.42) | 1   | 291.56#<br>(7.38-1,624.45<br>) | 0   | 0.00<br>(0.00-2,862.3<br>4) | 0  | 0.00<br>(0.00-7,396.4<br>0) | 1   | 124.23#<br>(3.15-692.16<br>) |
| Symptoms, Signs<br>and Ill-Defined<br>Conditions         | 40  | 5.68#<br>(4.06-7.73)    | 29  | 3.29#<br>(2.21-4.73)           | 6   | 1.53<br>(0.56-3.32)         | 5  | 3.12#<br>(1.01-7.28)        | 80  | 3.74#<br>(2.97-4.66)         |
| Accidents and<br>Adverse Effects                         | 24  | 1.17<br>(0.75-1.74)     | 42  | 1.67#<br>(1.20-2.25)           | 19  | 1.82#<br>(1.09-2.84)        | 7  | 1.56<br>(0.63-3.21)         | 92  | 1.52#<br>(1.22-1.86)         |
| Suicide and<br>Self-Inflicted<br>Injury                  | 42  | 7.27#<br>(5.24-9.83)    | 20  | 2.87#<br>(1.75-4.43)           | 3   | 1.13<br>(0.23-3.29)         | 2  | 1.92<br>(0.23-6.93)         | 67  | 4.07#<br>(3.16-5.17)         |
| Homicide and<br>Legal Intervention                       | 0   | 0.00<br>(0.00-3.85)     | 5   | 4.81#<br>(1.56-11.24)          | 0   | 0.00<br>(0.00-10.59)        | 0  | 0.00<br>(0.00-31.27)        | 5   | 2.03<br>(0.66-4.74)          |
| Other Cause of<br>Death                                  | 293 | 2.99#<br>(2.66-3.35)    | 266 | 2.13#<br>(1.88-2.40)           | 107 | 1.87#<br>(1.54-2.27)        | 43 | 1.66#<br>(1.20-2.24)        | 709 | 2.32#<br>(2.15-2.50)         |

**1** number of cancer patients who died due to each cause of death.

**2** 95% Confidence interval.

# P value less than .05.

**Supplementary table 20: Standardized mortality ratio (SMR) for each cause of death following esophageal cancer diagnosis in patients who received chemotherapy.**

| Cause of Death                               | Less than a year      |                                  | 1-5 years             |                                  | 5-10 years            |                            | More than 10 years    |                            | Total                 |                                  |
|----------------------------------------------|-----------------------|----------------------------------|-----------------------|----------------------------------|-----------------------|----------------------------|-----------------------|----------------------------|-----------------------|----------------------------------|
|                                              | Observed <sup>1</sup> | SMR (95% CI <sup>2</sup> )       | Observed <sup>1</sup> | SMR (95% CI <sup>2</sup> )       | Observed <sup>1</sup> | SMR (95% CI <sup>2</sup> ) | Observed <sup>1</sup> | SMR (95% CI <sup>2</sup> ) | Observed <sup>1</sup> | SMR (95% CI <sup>2</sup> )       |
| All Causes of Death                          | 15,133                | 21.96#<br>(21.61-22.31)          | 12,636                | 14.30#<br>(14.06-14.56)          | 1,331                 | 3.44#<br>(3.26-3.63)       | 399                   | 2.45#<br>(2.21-2.70)       | 29,499                | 13.90#<br>(13.74-14.06)          |
| All Malignant Cancer Causes of Death         | 13,814                | 75.26#<br>(74.01-76.52)          | 11,299                | 49.65#<br>(48.73-50.57)          | 780                   | 8.30#<br>(7.72-8.90)       | 172                   | 4.64#<br>(3.97-5.38)       | 26,065                | 48.07#<br>(47.49-48.65)          |
| Esophageal Cancer Deaths                     | 12,667                | 2,087.68#<br>(2,051.48-2,124.35) | 10,136                | 1,379.48#<br>(1,352.75-1,406.60) | 537                   | 181.88#<br>(166.82-197.94) | 89                    | 78.14#<br>(62.76-96.16)    | 23,429                | 1,338.30#<br>(1,321.21-1,355.54) |
| Non-cancer Causes of Death                   |                       |                                  |                       |                                  |                       |                            |                       |                            |                       |                                  |
| In situ, benign or unknown behavior neoplasm | 24                    | 5.43#<br>(3.48-8.07)             | 33                    | 5.72#<br>(3.93-8.03)             | 7                     | 2.68#<br>(1.08-5.51)       | 0                     | 0.00<br>(0.00-3.27)        | 64                    | 4.59#<br>(3.54-5.86)             |

|                                    |     |                       |     |                       |     |                       |    |                         |       |                       |
|------------------------------------|-----|-----------------------|-----|-----------------------|-----|-----------------------|----|-------------------------|-------|-----------------------|
| Tuberculosis                       | 0   | 0.00<br>(0.00-19.37)  | 0   | 0.00<br>(0.00-16.61)  | 1   | 11.65<br>(0.30-64.93) | 0  | 0.00<br>(0.00-113.21)   | 1     | 1.88<br>(0.05-10.49)  |
| Syphilis                           | 0   | 0.00<br>(0.00-307.51) | 0   | 0.00<br>(0.00-245.80) | 0   | 0.00<br>(0.00-553.77) | 0  | 0.00<br>(0.00-1,470.95) | 0     | 0.00<br>(0.00-101.98) |
| Septicemia                         | 71  | 7.11#<br>(5.55-8.97)  | 64  | 4.94#<br>(3.81-6.31)  | 19  | 3.32#<br>(2.00-5.18)  | 10 | 4.16#<br>(2.00-7.65)    | 164   | 5.28#<br>(4.50-6.15)  |
| Other Infectious Diseases          | 42  | 6.40#<br>(4.61-8.66)  | 23  | 2.91#<br>(1.85-4.37)  | 9   | 2.80#<br>(1.28-5.31)  | 0  | 0.00<br>(0.00-3.01)     | 74    | 3.92#<br>(3.08-4.92)  |
| Diabetes Mellitus                  | 25  | 1.11<br>(0.72-1.63)   | 27  | 0.95<br>(0.63-1.39)   | 11  | 0.92<br>(0.46-1.64)   | 3  | 0.61<br>(0.13-1.79)     | 66    | 0.97<br>(0.75-1.24)   |
| Alzheimer's                        | 2   | 0.12#<br>(0.01-0.43)  | 13  | 0.52#<br>(0.27-0.88)  | 17  | 1.26<br>(0.73-2.01)   | 6  | 0.88<br>(0.32-1.91)     | 38    | 0.61#<br>(0.43-0.84)  |
| Diseases of Heart                  | 431 | 2.34#<br>(2.12-2.57)  | 455 | 1.94#<br>(1.77-2.13)  | 200 | 1.98#<br>(1.72-2.28)  | 81 | 1.92#<br>(1.52-2.38)    | 1,167 | 2.08#<br>(1.96-2.20)  |
| Hypertension without Heart Disease | 7   | 1.05<br>(0.42-2.17)   | 11  | 1.21<br>(0.60-2.17)   | 8   | 1.83<br>(0.79-3.60)   | 3  | 1.52<br>(0.31-4.44)     | 29    | 1.31<br>(0.88-1.88)   |
| Cerebrovascular Diseases           | 53  | 1.47#<br>(1.10-1.92)  | 59  | 1.26<br>(0.96-1.63)   | 26  | 1.27<br>(0.83-1.86)   | 10 | 1.13<br>(0.54-2.08)     | 148   | 1.32#<br>(1.12-1.55)  |
| Atherosclerosis                    | 7   | 3.34#                 | 4   | 1.52                  | 1   | 0.94                  | 0  | 0.00                    | 12    | 1.94                  |

|                                                     |    |                      |     |                      |    |                      |    |                      |     |                      |
|-----------------------------------------------------|----|----------------------|-----|----------------------|----|----------------------|----|----------------------|-----|----------------------|
|                                                     |    | (1.34-6.88)          |     | (0.41-3.88)          |    | (0.02-5.25)          |    | (0.00-9.11)          |     | (1.00-3.38)          |
| Aortic Aneurysm and Dissection                      | 9  | 2.26#<br>(1.03-4.28) | 11  | 2.33#<br>(1.16-4.16) | 2  | 1.11<br>(0.13-4.00)  | 0  | 0.00<br>(0.00-5.48)  | 22  | 1.96#<br>(1.23-2.97) |
| Other Diseases of Arteries, Arterioles, Capillaries | 4  | 1.52<br>(0.41-3.89)  | 6   | 1.77<br>(0.65-3.86)  | 2  | 1.35<br>(0.16-4.87)  | 1  | 1.62<br>(0.04-9.02)  | 13  | 1.60<br>(0.85-2.74)  |
| Pneumonia and Influenza                             | 63 | 4.22#<br>(3.25-5.40) | 54  | 2.76#<br>(2.07-3.60) | 19 | 2.17#<br>(1.31-3.39) | 9  | 2.42#<br>(1.11-4.60) | 145 | 3.09#<br>(2.61-3.63) |
| Chronic Obstructive Pulmonary Disease               | 97 | 2.23#<br>(1.81-2.72) | 146 | 2.58#<br>(2.18-3.04) | 72 | 2.88#<br>(2.25-3.62) | 36 | 3.41#<br>(2.39-4.72) | 351 | 2.59#<br>(2.32-2.87) |
| Stomach and Duodenal Ulcers                         | 1  | 1.05<br>(0.03-5.84)  | 4   | 3.41<br>(0.93-8.73)  | 1  | 2.10<br>(0.05-11.68) | 0  | 0.00<br>(0.00-19.02) | 6   | 2.14<br>(0.79-4.67)  |
| Chronic Liver Disease and Cirrhosis                 | 29 | 3.15#<br>(2.11-4.53) | 21  | 1.93#<br>(1.20-2.95) | 10 | 2.42#<br>(1.16-4.44) | 4  | 2.56<br>(0.70-6.54)  | 64  | 2.48#<br>(1.91-3.17) |
| Nephritis, Nephrotic Syndrome and Nephrosis         | 27 | 2.01#<br>(1.33-2.93) | 18  | 1.02<br>(0.6-1.61)   | 8  | 0.99<br>(0.43-1.96)  | 7  | 2.06<br>(0.83-4.24)  | 60  | 1.41#<br>(1.08-1.82) |
| Complications of Pregnancy,                         | 1  | 230.94#              | 0   | 0.00                 | 0  | 0.00                 | 0  | 0.00                 | 1   | 94.89#               |



|                                                          |     |                         |     |                                |     |                             |    |                             |     |                              |
|----------------------------------------------------------|-----|-------------------------|-----|--------------------------------|-----|-----------------------------|----|-----------------------------|-----|------------------------------|
| Childbirth,<br>Puerperium                                |     | (5.85-1,286.71)         |     | (0.00-816.17)                  |     | (0.00-2,833.6<br>2)         |    | (0.00-9,548.9<br>4)         |     | (2.40-528.72<br>)            |
| Congenital<br>Anomalies                                  | 0   | 0.00<br>(0.00-5.41)     | 1   | 1.23<br>(0.03-6.87)            | 1   | 3.22<br>(0.08-17.94)        | 0  | 0.00<br>(0.00-31.05)        | 2   | 1.04<br>(0.13-3.76)          |
| Certain Conditions<br>Originating in<br>Perinatal Period | 0   | 0.00<br>(0.00-1,154.17) | 1   | 267.52#<br>(6.77-1,490.53<br>) | 0   | 0.00<br>(0.00-2,627.6<br>5) | 0  | 0.00<br>(0.00-6,998.1<br>2) | 1   | 112.80#<br>(2.86-628.49<br>) |
| Symptoms, Signs<br>and Ill-Defined<br>Conditions         | 39  | 6.14#<br>(4.36-8.39)    | 27  | 3.14#<br>(2.07-4.57)           | 6   | 1.47<br>(0.54-3.20)         | 5  | 2.95<br>(0.96-6.89)         | 77  | 3.71#<br>(2.93-4.64)         |
| Accidents and<br>Adverse Effects                         | 31  | 1.47#<br>(1.00-2.09)    | 44  | 1.67#<br>(1.22-2.25)           | 20  | 1.78#<br>(1.09-2.76)        | 7  | 1.47<br>(0.59-3.03)         | 102 | 1.61#<br>(1.31-1.96)         |
| Suicide and<br>Self-Inflicted<br>Injury                  | 43  | 6.52#<br>(4.72-8.78)    | 24  | 3.11#<br>(1.99-4.63)           | 3   | 1.02<br>(0.21-2.98)         | 2  | 1.8<br>(0.22-6.50)          | 72  | 3.92#<br>(3.07-4.94)         |
| Homicide and<br>Legal Intervention                       | 0   | 0.00<br>(0.00-3.40)     | 5   | 4.39#<br>(1.43-10.25)          | 0   | 0.00<br>(0.00-9.84)         | 0  | 0.00<br>(0.00-29.76)        | 5   | 1.84<br>(0.60-4.28)          |
| Other Cause of<br>Death                                  | 313 | 3.42#<br>(3.05-3.82)    | 286 | 2.30#<br>(2.04-2.58)           | 108 | 1.80#<br>(1.48-2.17)        | 43 | 1.57#<br>(1.14-2.12)        | 750 | 2.47#<br>(2.30-2.65)         |

**1** number of cancer patients who died due to each cause of death.

**2** 95% Confidence interval.

# P value less than .05.
